# Supplementary material for: A rescued dataset of sub-daily meteorological observations for Europe and the southern Mediterranean region, 1877–2012
Source: Copernicus journal article supplement (doi:10.5194/essd-2018-39), 2018-05-03
Supplement: Supplementary file 1 [file Ashcroft_etal_UERRA_SupplementTable1.xlsx]

## Sheet: MARS-55N-45N.025E-015E
Supplementary Table 1. Summary of data available in Meteorological Archival and Retrieval System (MARS) in the Scandanavian (55-71N, 25-5E), Mediterranean (29-45N, 10W-40E) and eastern European (45-55N, 25-15E) sectors.The columns show for each station in MARS: the WMO station number; latitude (decimal degrees); longitude (decimal degrees); altitude (m); number of observations per day; and then t…
WMO Station No.	Latitude (N)	Longitude (E)	Altitude	Frequency of observations per day	%PP	%WD	%WS	%TT	%DP	%RR	%SD	%RH
2596	47.42	18.92	5	2	0	0	0	0	0	0	0	0
6199	55.00	15.08	6	8	30	30	30	30	30	0	0	30
6199	55.00	15.10	6	4	0	0	0	0	0	0	0	0
9499	51.17	15.00	237	4	0	0	0	0	0	0	0	0
11019	48.68	15.37	620	6	27	27	27	27	27	6	0	27
11020	48.62	15.20	511	2	8	8	8	8	8	8	0	8
11021	48.97	15.03	570	4	14	26	26	25	26	14	0	25
11021	48.95	15.03	555	4	15	14	14	15	15	12	0	15
11022	48.77	15.97	243	2	6	6	6	6	6	0	0	6
11022	48.77	15.95	262	4	39	39	39	39	39	19	0	39
11024	48.33	15.35	860	2	0	0	0	0	0	0	0	0
11024	48.35	15.37	860	2	0	3	3	3	3	2	0	3
11024	48.33	15.33	959	1	0	0	0	0	0	0	0	0
11026	48.45	15.63	312	2	0	0	0	0	0	0	0	0
11028	48.20	15.63	282	4	6	6	6	6	6	0	0	6
11028	48.20	15.70	277	2	0	0	0	0	0	0	0	0
11028	48.20	15.62	282	4	34	34	34	34	34	5	0	34
11028	48.18	15.62	284	12	11	11	11	11	11	10	0	11
11030	48.32	16.12	176	8	60	60	60	60	60	56	0	60
11032	48.67	16.62	210	4	0	4	4	4	4	0	0	4
11032	48.67	16.63	209	4	25	26	26	26	26	21	0	26
11033	48.15	16.13	440	2	0	0	0	0	0	0	0	0
11034	48.20	16.37	171	24	6	7	7	7	7	7	0	7
11035	48.25	16.37	203	8	54	54	54	54	54	54	0	54
11035	48.25	16.40	203	1	0	0	0	0	0	0	0	0
11035	48.23	16.35	209	18	3	3	3	3	3	3	0	3
11035	48.25	16.35	209	18	4	4	4	4	4	4	0	4
11036	48.12	16.57	193	8	87	87	87	87	87	61	0	87
11036	48.11	16.56	193	2	0	0	0	0	0	0	0	0
11037	48.20	16.57	153	1	0	0	0	0	0	0	0	0
11038	48.12	16.88	205	1	0	0	0	0	0	0	0	0
11039	48.10	16.93	183	2	0	0	0	0	0	0	0	0
11040	48.13	16.42	199	2	0	0	0	0	0	0	0	0
11070	48.42	15.62	204	2	0	0	0	0	0	0	0	0
11075	48.47	15.70	210	2	4	5	5	5	5	4	0	5
11078	48.03	15.58	681	4	27	27	27	27	27	19	0	27
11080	48.20	16.23	227	1	0	0	0	0	0	0	0	0
11081	48.02	16.23	249	2	0	0	0	0	0	0	0	0
11082	48.03	16.28	218	24	7	7	7	7	7	7	0	7
11083	48.57	16.37	451	2	0	0	0	0	0	0	0	0
11085	48.33	16.83	146	1	0	0	0	0	0	0	0	0
11169	47.82	15.25	1626	2	0	0	0	0	0	0	0	0
11170	47.85	15.07	615	4	23	23	23	23	23	18	0	23
11170	47.85	15.00	615	4	5	5	5	5	5	5	0	5
11171	47.80	15.30	872	2	0	0	0	0	0	0	0	0
11171	47.78	15.30	860	1	0	0	0	0	0	0	0	0
11172	47.77	15.32	865	8	0	50	50	50	50	29	0	50
11174	47.33	15.08	580	2	7	7	7	7	7	7	0	7
11174	47.33	15.00	572	2	0	0	0	0	0	0	0	0
11175	47.42	15.27	485	4	5	46	46	46	46	1	0	46
11176	47.47	15.33	527	2	0	0	0	0	0	0	0	0
11180	47.72	15.78	1546	2	0	7	7	7	7	6	0	7
11181	47.97	16.27	233	1	0	0	0	0	0	0	0	0
11182	47.83	16.22	285	4	51	52	47	51	52	6	0	51
11183	47.65	15.83	985	2	0	0	0	0	0	0	0	0
11183	47.63	15.85	860	1	0	0	0	0	0	0	0	0
11184	47.57	15.78	1782	1	0	0	0	0	0	0	0	0
11185	47.52	16.05	955	4	6	14	14	14	14	0	0	14
11185	47.50	16.05	980	2	0	0	0	0	0	0	0	0
11185	47.52	16.03	1000	8	0	11	11	11	11	10	0	11
11186	47.43	16.12	730	1	0	0	0	0	0	0	0	0
11189	47.33	16.23	360	2	0	0	0	0	0	0	0	0
11190	47.85	16.52	195	2	0	0	0	0	0	0	0	0
11190	47.85	16.55	165	8	19	19	19	19	19	17	0	19
11190	47.85	16.53	190	14	40	40	40	40	40	40	0	40
11191	47.80	16.57	164	2	0	0	0	0	0	0	0	0
11192	47.22	16.33	230	2	7	7	7	7	7	7	0	7
11192	47.20	16.33	267	2	0	0	0	0	0	0	0	0
11194	47.95	16.87	129	2	9	14	14	14	14	13	0	14
11194	47.95	16.85	132	2	0	0	0	0	0	0	0	0
11195	47.15	16.32	290	2	0	0	0	0	0	0	0	0
11196	47.12	16.27	235	1	0	0	0	0	0	0	0	0
11236	47.23	15.23	999	2	0	0	0	0	0	0	0	0
11237	46.95	15.15	1052	2	0	0	0	0	0	0	0	0
11240	47.00	15.45	342	8	37	36	36	37	37	0	0	37
11240	47.00	15.50	340	4	0	0	0	0	0	0	0	0
11240	47.00	15.43	347	8	61	61	55	61	61	42	0	61
11241	47.20	15.47	1444	2	0	0	0	0	0	0	0	0
11245	46.87	15.90	292	2	6	6	6	6	6	0	0	6
11248	46.70	15.98	208	4	3	3	3	3	3	2	0	3
11248	46.68	15.98	214	4	7	8	8	7	7	7	0	7
11285	46.82	15.23	355	1	0	0	0	0	0	0	0	0
11290	47.12	15.45	377	1	0	0	0	0	0	0	0	0
11290	47.08	15.45	378	1	0	0	0	0	0	0	0	0
11292	47.08	15.58	526	8	10	10	10	10	10	10	0	10
11292	47.07	15.58	533	1	0	0	0	0	0	0	0	0
11295	46.78	15.55	272	2	0	0	0	0	0	0	0	0
11298	46.93	15.87	283	1	0	0	0	0	0	0	0	0
11370	47.45	15.30	505	4	12	12	12	12	12	10	0	12
11375	47.55	15.23	774	1	0	0	0	0	0	0	0	0
11378	47.87	15.88	709	1	0	0	0	0	0	0	0	0
11380	47.70	15.85	485	2	4	4	4	4	4	4	0	4
11380	47.70	15.83	486	2	0	0	0	0	0	0	0	0
11382	47.78	15.92	586	2	6	6	6	6	6	6	0	6
11382	47.78	15.90	582	2	0	0	0	0	0	0	0	0
11383	47.63	15.83	993	2	0	1	1	1	1	1	0	1
11384	47.63	15.82	1323	24	0	2	2	2	2	2	0	2
11385	47.82	16.03	936	2	0	7	7	7	7	7	0	7
11387	47.98	16.50	186	1	0	0	0	0	0	0	0	0
11390	47.28	15.98	335	1	0	0	0	0	0	0	0	0
11393	47.47	16.67	199	1	0	0	0	0	0	0	0	0
11603	50.77	15.02	400	8	63	63	63	63	63	59	0	63
11603	50.77	15.10	400	4	0	0	0	0	0	0	0	0
11603	50.80	15.00	400	2	0	0	0	0	0	0	0	0
11624	49.60	15.20	0	2	0	0	0	0	0	0	0	0
11624	49.93	15.38	239	8	28	28	28	28	28	28	0	28
11628	49.58	15.08	534	8	39	42	42	42	42	28	0	42
11636	49.18	15.47	569	8	1	33	33	33	33	32	0	33
11643	50.66	15.75	816	8	0	1	1	1	1	1	0	1
11643	50.67	15.75	816	4	0	13	13	13	13	10	0	13
11648	50.25	15.85	245	8	55	55	55	55	55	26	0	55
11648	50.30	15.90	244	2	0	0	0	0	0	0	0	0
11649	50.18	15.83	285	1	0	0	0	0	0	0	0	0
11652	50.00	15.50	0	2	0	0	0	0	0	0	0	0
11652	50.02	15.73	230	8	28	28	28	28	28	28	0	28
11659	49.58	15.77	530	8	85	85	85	85	85	60	0	85
11659	49.58	15.80	530	4	0	0	0	0	0	0	0	0
11679	49.98	16.43	398	8	77	76	76	77	77	61	0	77
11683	49.73	16.03	737	8	0	31	31	31	31	28	0	31
11692	49.10	16.10	0	2	0	0	0	0	0	0	0	0
11692	49.20	16.10	478	2	0	0	0	0	0	0	0	0
11692	49.17	16.13	478	8	3	3	3	3	3	3	0	3
11692	49.17	16.12	479	8	25	25	25	25	25	25	0	25
11693	49.10	16.13	400	8	42	42	42	42	42	41	0	42
11698	48.88	16.08	339	8	59	59	59	59	59	58	0	59
11710	49.65	16.95	518	8	59	59	59	59	59	55	0	59
11722	49.12	16.75	300	1	0	0	0	0	0	0	0	0
11723	49.15	16.70	238	8	77	77	77	77	77	61	0	77
11723	49.17	16.70	241	8	0	0	0	0	0	0	0	0
11730	50.18	17.12	1327	4	0	2	2	2	2	1	0	2
11735	50.07	17.23	1492	8	16	17	17	17	17	0	0	17
11747	49.30	17.10	0	2	0	0	0	0	0	0	0	0
11748	49.30	17.20	0	2	0	0	0	0	0	0	0	0
11748	49.40	17.40	211	2	0	0	0	0	0	0	0	0
11748	49.42	17.40	209	8	25	25	25	25	25	25	0	25
11750	49.43	17.40	208	8	5	5	5	5	5	3	0	5
11766	49.77	17.55	750	8	0	14	14	14	14	13	0	14
11766	49.78	17.55	750	8	0	17	17	17	17	17	0	17
11774	49.32	17.57	231	8	79	79	79	79	79	60	0	79
11782	49.78	18.27	257	4	42	42	42	42	42	0	0	42
11782	49.78	18.30	257	4	0	0	0	0	0	0	0	0
11782	49.68	18.12	256	8	62	62	62	62	62	61	0	62
11783	49.40	18.10	0	2	0	0	0	0	0	0	0	0
11787	49.55	18.45	1324	8	6	14	14	14	14	7	0	14
11801	48.20	17.10	0	1	0	0	0	0	0	0	0	0
11801	48.40	17.15	207	2	0	0	0	0	0	0	0	0
11816	48.20	17.20	138	8	91	91	91	91	91	61	0	91
11819	48.48	17.67	185	2	0	0	0	0	0	0	0	0
11826	48.53	17.83	168	8	37	37	37	37	37	32	0	37
11826	48.62	17.83	165	4	29	29	29	29	29	10	0	29
11827	48.30	17.50	0	2	0	0	0	0	0	0	0	0
11841	49.23	18.62	311	8	56	56	56	56	56	42	0	56
11841	48.23	18.62	311	4	8	8	8	8	8	0	0	8
11842	48.50	18.00	0	2	0	0	0	0	0	0	0	0
11847	48.63	18.33	186	2	0	0	0	0	0	0	0	0
11855	48.28	18.13	135	4	50	50	50	50	50	21	0	50
11856	48.28	18.45	269	2	0	0	0	0	0	0	0	0
11858	47.87	18.20	119	8	82	82	82	82	82	39	0	82
11865	49.20	18.77	366	4	12	12	12	12	12	0	0	12
11867	48.77	18.60	260	4	59	59	59	59	59	3	0	59
11880	48.17	18.88	141	4	7	7	7	7	7	0	0	7
11880	48.17	18.87	141	4	52	52	52	52	52	4	0	52
11903	48.63	19.15	319	8	65	65	65	65	65	32	0	65
11903	48.63	19.20	316	4	0	0	0	0	0	0	0	0
11903	48.65	19.15	315	8	29	29	29	29	29	29	0	29
11913	48.40	19.10	0	2	0	0	0	0	0	0	0	0
11916	48.93	19.58	2008	2	6	11	11	11	11	0	0	11
11916	48.98	19.60	2007	4	0	7	7	7	7	0	0	7
11918	49.36	19.68	692	4	1	1	1	1	1	0	0	1
11918	49.37	19.68	692	4	3	29	29	29	29	1	0	29
11927	48.33	19.77	219	8	30	30	30	30	30	26	0	30
11927	48.30	19.80	219	2	0	0	0	0	0	0	0	0
11927	48.33	19.73	215	4	29	29	29	29	29	2	0	29
11930	49.20	20.22	2638	4	11	31	31	31	31	0	0	31
11933	49.12	20.07	1368	2	0	0	0	0	0	0	0	0
11933	49.12	20.08	1368	4	0	7	7	7	7	0	0	7
11934	49.07	20.25	707	8	1	57	57	57	57	49	0	57
11934	49.07	20.30	703	4	0	0	0	0	0	0	0	0
11934	49.06	20.25	707	2	0	0	0	0	0	0	0	0
11938	48.85	20.18	906	4	2	47	47	47	47	0	0	47
11952	49.03	20.32	706	4	0	0	0	0	0	0	0	0
11955	49.03	21.32	324	2	0	0	0	0	0	0	0	0
11958	48.78	20.98	1246	1	0	0	0	0	0	0	0	0
11967	48.40	21.20	0	4	0	0	0	0	0	0	0	0
11968	48.70	21.27	232	8	64	64	64	64	64	32	0	64
11968	48.70	21.30	230	4	0	0	0	0	0	0	0	0
11968	48.67	21.22	231	8	29	29	29	29	29	29	0	29
11976	49.22	21.65	220	4	59	59	59	59	59	4	0	59
11978	48.66	21.73	104	8	0	1	1	1	1	1	0	1
11978	48.67	21.73	104	4	31	41	41	41	41	8	0	41
11993	48.93	22.00	177	4	78	78	78	78	78	2	0	78
12100	54.18	15.58	5	8	56	56	56	56	56	28	0	56
12100	54.18	15.60	3	2	0	0	0	0	0	0	0	0
12105	54.20	16.18	34	8	28	28	28	28	28	0	0	28
12105	54.20	16.20	33	4	0	0	0	0	0	0	0	0
12105	54.20	16.15	34	8	61	61	61	61	61	60	0	61
12106	54.07	16.27	73	4	2	2	2	2	2	0	0	2
12106	54.03	16.30	73	2	0	0	0	0	0	0	0	0
12115	54.58	16.87	8	24	65	65	65	65	65	47	0	65
12115	54.58	16.90	6	2	0	0	0	0	0	0	0	0
12120	54.77	17.57	2	4	3	4	4	3	3	0	0	3
12120	54.75	17.60	2	4	0	0	0	0	0	0	0	0
12120	54.75	17.53	2	8	64	64	64	64	64	61	0	64
12120	54.80	17.50	2	2	0	0	0	0	0	0	0	0
12125	54.55	17.75	22	8	52	52	52	52	52	24	0	52
12135	54.60	18.82	3	8	63	63	63	63	63	60	0	63
12135	54.60	18.90	1	2	0	0	0	0	0	0	0	0
12140	54.40	18.70	74	24	23	23	23	23	23	23	0	23
12145	54.52	18.57	15	2	0	0	0	0	0	0	0	0
12150	54.38	18.60	12	8	29	29	29	29	29	0	0	29
12150	54.38	18.47	149	8	9	9	9	9	9	5	0	9
12155	54.33	18.93	9	8	18	18	18	18	18	18	0	18
12160	54.17	19.43	43	24	58	58	58	58	58	47	0	58
12185	54.02	21.37	110	8	19	19	19	19	19	0	0	19
12185	54.02	21.40	108	4	0	0	0	0	0	0	0	0
12185	54.07	21.37	110	8	61	61	61	61	61	29	0	61
12195	54.13	22.95	186	8	87	87	87	87	87	60	0	87
12195	54.13	23.00	183	4	0	0	0	0	0	0	0	0
12210	53.77	15.42	56	2	39	39	39	39	39	14	0	39
12210	53.77	15.45	56	4	0	0	0	0	0	0	0	0
12215	53.72	16.68	144	8	38	38	38	38	38	24	0	38
12225	53.28	16.47	118	8	8	8	8	8	8	0	0	8
12230	53.13	16.75	72	24	58	59	59	58	58	46	0	58
12235	53.70	17.55	177	8	66	66	66	66	66	37	0	66
12235	53.70	17.60	172	4	0	0	0	0	0	0	0	0
12235	53.72	17.55	172	24	23	23	23	23	23	23	0	23
12240	53.10	17.97	70	2	6	7	7	6	6	3	0	6
12240	53.10	18.00	70	2	0	0	0	0	0	0	0	0
12250	53.05	18.58	70	8	61	61	61	61	61	28	0	61
12250	53.05	18.60	69	4	0	0	0	0	0	0	0	0
12250	53.03	18.58	72	8	33	33	33	33	33	33	0	33
12270	53.10	20.35	146	8	90	90	90	90	90	60	0	90
12270	53.10	20.40	147	4	0	0	0	0	0	0	0	0
12272	53.77	20.42	135	24	70	70	70	70	70	58	0	70
12272	53.77	20.50	133	2	0	0	0	0	0	0	0	0
12280	53.78	21.58	131	8	66	66	66	66	66	54	0	66
12280	53.78	21.60	127	2	0	0	0	0	0	0	0	0
12285	53.08	21.57	95	8	47	47	47	47	47	25	0	47
12295	53.10	23.17	151	8	92	92	92	92	92	61	0	92
12295	53.10	23.20	148	4	0	0	0	0	0	0	0	0
12295	53.10	23.16	151	4	1	1	1	1	1	0	0	1
12300	52.73	15.25	56	8	11	11	11	11	11	0	0	11
12300	52.73	15.30	65	2	0	0	0	0	0	0	0	0
12300	52.75	15.28	73	8	61	61	61	61	61	60	0	61
12330	52.42	16.83	92	8	63	63	63	63	63	39	0	63
12330	52.43	16.90	92	4	0	0	0	0	0	0	0	0
12330	52.43	16.83	92	8	5	5	5	5	5	0	0	5
12330	52.41	16.83	92	4	1	1	1	1	1	0	0	1
12330	52.42	16.85	84	24	23	23	23	23	23	23	0	23
12345	52.20	18.67	117	24	58	58	58	58	58	52	0	58
12360	52.53	19.67	63	8	15	14	14	14	14	0	0	14
12360	52.53	19.70	63	4	0	0	0	0	0	0	0	0
12360	52.58	19.75	109	8	2	2	2	2	2	2	0	2
12360	52.58	19.73	109	24	59	59	59	59	59	59	0	59
12365	52.13	20.72	98	2	0	0	0	0	0	0	0	0
12374	52.40	20.97	96	2	0	0	0	0	0	0	0	0
12375	52.15	20.98	109	8	29	29	29	29	29	0	0	29
12375	52.15	21.00	106	4	0	0	0	0	0	0	0	0
12375	52.17	20.97	107	8	61	61	61	61	61	61	0	61
12385	52.18	22.27	146	8	63	63	63	63	63	38	0	63
12385	52.18	22.30	146	4	0	0	0	0	0	0	0	0
12385	52.25	22.25	155	24	23	23	23	23	23	23	0	23
12399	52.07	23.62	135	24	57	57	57	57	57	48	0	57
12399	52.07	23.70	135	2	0	0	0	0	0	0	0	0
12400	51.93	15.50	174	8	32	32	32	32	32	0	0	32
12400	51.93	15.53	192	8	61	61	61	61	61	59	0	61
12405	51.13	15.03	202	2	0	0	0	0	0	0	0	0
12405	51.13	15.10	202	1	0	0	0	0	0	0	0	0
12415	51.22	16.17	122	2	4	4	4	4	4	0	0	4
12415	51.20	16.20	124	24	58	59	59	58	58	58	0	58
12418	51.83	16.53	92	24	58	58	58	58	58	48	0	58
12424	51.10	16.88	124	8	88	88	88	88	88	61	0	88
12424	51.10	16.90	120	4	0	0	0	0	0	0	0	0
12425	51.13	16.98	119	8	6	6	6	6	6	0	0	6
12425	51.12	16.88	122	1	0	0	0	0	0	0	0	0
12435	51.73	18.08	144	8	71	71	71	71	71	34	0	71
12435	51.73	18.10	140	4	0	0	0	0	0	0	0	0
12435	51.78	18.08	140	24	23	23	23	23	23	23	0	23
12455	51.22	18.58	198	2	4	4	4	4	4	3	0	4
12455	51.22	18.57	201	24	55	55	55	55	55	54	0	55
12465	51.73	19.40	188	8	92	92	92	92	92	61	0	92
12469	51.35	19.87	189	24	57	57	57	57	56	47	0	56
12471	51.83	20.80	180	1	0	0	0	0	0	0	0	0
12485	51.42	21.12	185	2	7	9	9	9	9	0	0	9
12488	51.58	21.55	112	2	0	0	0	0	0	0	0	0
12488	51.67	21.47	112	4	3	3	3	3	3	2	0	3
12488	51.57	21.55	126	24	53	53	53	53	52	44	0	52
12490	51.55	21.85	124	2	5	6	6	6	5	0	0	5
12491	51.42	21.97	143	2	0	0	0	0	0	0	0	0
12495	51.23	22.57	177	8	21	21	21	21	21	0	0	21
12495	51.23	22.60	171	4	0	0	0	0	0	0	0	0
12495	51.22	22.40	240	8	61	61	61	61	61	61	0	61
12497	51.55	23.55	175	2	8	8	8	8	8	0	0	8
12497	51.55	23.53	179	24	58	59	59	59	58	58	0	58
12500	50.90	15.80	344	24	60	60	60	60	60	58	0	60
12510	50.73	15.73	1611	8	13	20	20	20	20	7	0	20
12510	50.73	15.80	1603	2	0	0	0	0	0	0	0	0
12520	50.43	16.65	320	8	26	26	26	26	26	0	0	26
12520	50.43	16.70	316	4	0	0	0	0	0	0	0	0
12520	50.43	16.62	357	8	61	61	61	61	61	60	0	61
12530	50.67	17.97	176	8	45	46	46	46	45	33	0	45
12530	50.80	17.97	163	24	23	23	23	23	23	23	0	23
12540	50.08	18.22	193	2	0	0	0	0	0	0	0	0
12540	50.05	18.20	206	24	55	55	55	55	55	46	0	55
12550	50.82	19.10	295	4	69	69	69	68	68	38	0	68
12555	50.48	19.08	301	2	0	0	0	0	0	0	0	0
12560	50.23	19.03	284	8	73	73	73	73	73	61	0	73
12560	50.23	19.10	284	2	0	0	0	0	0	0	0	0
12565	50.08	19.80	237	24	80	80	80	80	80	49	0	80
12570	50.85	20.62	270	8	32	32	32	32	32	0	0	32
12570	50.85	20.70	268	4	0	0	0	0	0	0	0	0
12570	50.82	20.70	261	8	61	61	61	61	61	60	0	61
12575	50.03	20.98	209	8	79	79	79	79	79	41	0	79
12575	50.03	21.00	209	4	0	0	0	0	0	0	0	0
12577	50.30	21.45	170	2	0	0	0	0	0	0	0	0
12580	50.10	22.05	202	24	58	58	58	58	58	58	0	58
12580	50.10	22.10	200	2	0	0	0	0	0	0	0	0
12585	50.68	21.75	200	8	16	16	16	16	16	0	0	16
12585	50.70	21.72	217	24	57	57	57	57	57	51	0	57
12595	50.72	23.25	213	8	14	14	14	14	14	0	0	14
12595	50.70	23.30	212	2	0	0	0	0	0	0	0	0
12595	50.70	23.25	212	8	42	42	42	42	42	40	0	42
12600	49.80	19.00	398	24	67	67	67	67	67	58	0	67
12625	49.30	19.95	860	8	0	34	34	34	34	25	0	34
12625	49.30	19.97	857	24	0	7	7	7	7	7	0	7
12650	49.23	19.98	1989	24	5	12	12	12	12	7	0	12
12660	49.62	20.70	292	8	67	67	67	67	67	52	0	67
12690	49.47	22.33	375	8	31	31	31	31	31	23	0	31
12690	49.47	22.35	422	24	25	25	25	25	25	24	0	25
12695	49.80	22.77	219	8	71	71	71	71	71	24	0	71
12695	49.80	22.80	279	4	0	0	0	0	0	0	0	0
12756	48.12	19.52	153	16	2	2	2	2	2	0	0	2
12766	48.48	20.53	305	16	2	2	2	2	2	0	0	2
12772	48.13	20.80	119	8	22	22	22	22	22	21	0	22
12772	48.10	20.78	233	8	12	12	12	12	12	12	0	12
12772	48.08	20.77	236	24	8	8	8	8	8	8	0	8
12772	48.10	20.77	236	24	20	20	20	20	20	20	0	20
12778	48.32	21.57	118	1	0	0	0	0	0	0	0	0
12786	48.40	22.17	104	16	2	2	2	2	2	0	0	2
12788	48.23	22.12	110	1	0	0	0	0	0	0	0	0
12805	47.68	16.58	232	2	0	0	0	0	0	0	0	0
12805	47.68	16.60	238	8	40	40	40	40	40	36	0	40
12812	47.27	16.63	225	8	78	78	78	78	78	31	0	78
12812	47.27	16.70	224	4	0	0	0	0	0	0	0	0
12815	47.88	17.28	122	12	26	26	26	26	26	0	0	26
12822	47.70	17.68	117	8	58	58	58	58	58	31	0	58
12822	47.70	17.70	117	4	0	0	0	0	0	0	0	0
12822	47.72	17.68	117	24	21	21	21	21	21	15	0	21
12825	47.38	17.38	131	2	7	7	7	7	7	0	0	7
12825	47.35	17.47	141	8	26	26	26	26	26	24	0	26
12825	47.35	17.48	145	8	7	7	7	7	7	7	0	7
12825	47.20	17.50	146	16	9	9	9	9	9	4	0	9
12830	47.08	17.92	303	8	9	9	9	9	9	9	0	9
12830	47.07	17.98	287	8	7	7	7	7	7	7	0	7
12830	47.07	17.83	281	24	16	16	16	16	16	6	0	16
12831	47.70	18.88	676	2	0	0	0	0	0	0	0	0
12833	47.57	18.37	153	1	0	0	0	0	0	0	0	0
12836	47.65	18.32	129	4	1	1	1	1	1	0	0	1
12838	47.45	18.97	132	8	24	24	24	24	24	22	0	24
12839	47.43	19.23	150	2	0	0	0	0	0	0	0	0
12839	47.43	19.27	185	1	0	0	0	0	0	0	0	0
12840	47.52	19.03	130	4	2	2	2	2	2	0	0	2
12843	47.43	19.18	140	8	78	78	78	78	78	61	0	78
12843	47.43	19.20	140	4	0	0	0	0	0	0	0	0
12843	47.40	19.20	139	2	0	0	0	0	0	0	0	0
12844	47.35	18.98	104	12	8	8	8	8	8	0	0	8
12846	47.18	18.62	106	16	2	2	2	2	2	0	0	2
12851	47.87	20.02	1015	24	4	12	12	12	12	4	0	12
12860	47.17	20.23	87	8	51	51	51	51	51	22	0	51
12860	47.17	20.30	86	4	0	0	0	0	0	0	0	0
12860	47.12	20.23	89	24	35	35	35	35	35	19	0	35
12866	47.65	20.63	92	16	2	2	2	2	2	0	0	2
12870	47.90	20.38	218	12	28	28	28	28	28	0	0	28
12882	47.48	21.63	114	8	51	51	51	51	51	33	0	51
12882	47.48	21.70	111	4	0	0	0	0	0	0	0	0
12882	47.50	21.60	112	2	0	0	0	0	0	0	0	0
12882	47.48	21.60	109	24	28	28	28	28	28	28	0	28
12892	47.98	21.68	106	4	8	8	8	8	8	0	0	8
12892	47.98	21.70	106	4	6	6	6	6	6	6	0	6
12892	48.02	21.73	106	8	20	20	20	20	20	18	0	20
12892	48.00	21.70	106	2	0	0	0	0	0	0	0	0
12892	47.97	21.98	142	24	3	3	3	3	3	3	0	3
12892	47.97	21.88	142	16	10	10	10	10	10	2	0	10
12910	46.95	16.30	227	4	6	6	6	6	6	6	0	6
12910	46.92	16.30	319	8	27	27	27	27	27	27	0	27
12910	46.92	16.32	313	8	27	27	27	27	27	7	0	27
12915	46.88	16.80	190	2	0	0	0	0	0	0	0	0
12915	46.87	16.80	179	8	31	31	31	31	31	24	0	31
12920	46.75	17.25	117	4	10	10	10	10	10	10	0	10
12920	46.75	17.23	116	8	24	24	24	24	24	21	0	24
12920	46.73	17.23	113	12	5	5	5	5	5	0	0	5
12922	46.68	17.17	125	16	9	9	9	9	9	0	0	9
12925	46.47	16.97	147	8	26	26	26	26	26	1	0	26
12925	46.47	17.00	147	4	0	0	0	0	0	0	0	0
12925	46.45	16.98	141	8	32	32	32	32	32	32	0	32
12925	46.45	16.97	141	24	20	20	20	20	20	20	0	20
12930	46.38	17.83	145	8	16	16	16	16	16	10	0	16
12932	46.40	17.92	156	24	18	18	18	18	18	8	0	18
12935	46.92	18.05	108	16	29	29	29	29	29	13	0	29
12935	46.92	18.10	108	2	0	0	0	0	0	0	0	0
12935	46.92	18.03	108	8	32	32	32	32	32	31	0	32
12941	46.13	18.25	440	1	0	0	0	0	0	0	0	0
12942	46.00	18.23	201	8	74	74	74	74	74	52	0	74
12942	46.00	18.30	201	4	0	0	0	0	0	0	0	0
12942	46.10	18.23	203	14	3	3	3	3	3	1	0	3
12950	46.62	18.87	98	8	8	8	8	8	8	8	0	8
12950	46.58	18.85	98	16	28	28	28	28	28	12	0	28
12960	46.17	18.97	113	4	19	19	19	19	19	11	0	19
12960	46.18	19.02	113	8	29	29	29	29	29	16	0	29
12970	46.90	19.75	116	8	33	33	33	33	33	33	0	33
12970	46.92	19.75	123	16	28	28	28	28	28	12	0	28
12982	46.25	20.10	83	8	88	88	88	88	88	61	0	88
12982	46.30	20.10	83	2	0	0	0	0	0	0	0	0
12990	46.67	21.17	88	8	21	21	21	21	21	12	0	21
12992	46.70	21.13	86	8	21	21	21	21	21	20	0	21
12992	46.70	21.10	86	2	0	0	0	0	0	0	0	0
12992	46.68	21.17	90	6	27	27	27	27	27	0	0	27
13020	46.45	15.33	1480	2	0	0	0	0	0	0	0	0
13021	46.48	15.12	452	2	0	14	14	14	14	0	0	14
13023	46.25	15.25	244	6	16	22	22	22	22	0	0	22
13023	46.25	15.23	244	2	0	0	0	0	0	0	0	0
13024	46.07	15.28	941	6	0	7	7	7	7	3	0	7
13024	46.10	15.30	941	2	0	0	0	0	0	0	0	0
13024	46.06	15.28	941	2	0	0	0	0	0	0	0	0
13026	46.48	15.68	265	8	58	58	58	58	58	50	0	58
13026	46.50	15.70	265	2	0	0	0	0	0	0	0	0
13027	46.53	15.65	277	2	0	0	0	0	0	0	0	0
13031	46.66	16.13	191	2	0	0	0	0	0	0	0	0
13031	46.65	16.18	188	6	33	33	33	33	33	3	0	33
13033	46.30	16.35	169	2	0	0	0	0	0	0	0	0
13033	46.30	16.38	167	2	23	23	23	23	23	0	0	23
13033	46.30	16.40	168	2	0	0	0	0	0	0	0	0
13067	46.10	19.77	102	8	82	82	82	83	82	54	0	82
13067	46.10	19.80	102	4	0	0	0	0	0	0	0	0
13120	45.57	15.15	157	2	0	0	0	0	0	0	0	0
13121	45.80	15.18	208	6	46	46	46	46	46	1	0	46
13122	45.27	15.23	325	2	23	23	23	23	23	0	0	23
13122	45.30	15.20	328	1	0	0	0	0	0	0	0	0
13125	45.50	15.55	117	12	2	2	2	2	2	0	0	2
13128	45.73	16.07	107	8	49	49	49	49	49	29	0	49
13128	45.92	15.97	988	20	0	10	10	12	12	11	0	12
13128	45.90	15.97	988	2	0	0	0	0	0	0	0	0
13129	45.82	16.00	156	2	0	0	0	0	0	0	0	0
13129	45.82	15.98	162	12	7	7	7	7	7	0	0	7
13130	45.82	16.03	128	8	28	28	28	28	28	27	0	28
13130	45.80	16.00	128	2	0	0	0	0	0	0	0	0
13131	45.75	16.07	106	4	7	7	7	7	7	0	0	7
13131	45.73	16.10	106	4	0	0	0	0	0	0	0	0
13131	45.73	16.06	107	4	1	1	1	1	1	0	0	1
13131	45.70	16.10	107	2	0	0	0	0	0	0	0	0
13133	45.50	16.36	106	2	0	0	0	0	0	0	0	0
13142	45.77	17.23	161	2	0	0	0	0	0	0	0	0
13142	45.60	17.23	161	4	27	27	27	27	27	19	0	27
13142	45.60	17.20	162	2	0	0	0	0	0	0	0	0
13150	45.15	18.02	96	2	0	0	0	0	0	0	0	0
13150	45.17	18.00	83	8	31	31	31	31	31	29	0	31
13150	45.20	18.00	89	2	0	0	0	0	0	0	0	0
13156	45.53	18.73	92	2	8	8	8	8	8	0	0	8
13157	45.47	18.82	89	8	21	21	21	21	21	18	0	21
13160	45.77	19.15	89	8	56	56	56	56	56	50	0	56
13160	45.78	19.08	88	2	0	0	0	0	0	0	0	0
13160	45.80	19.20	89	2	0	0	0	0	0	0	0	0
13165	45.15	21.31	87	2	0	0	0	0	0	0	0	0
13168	45.25	19.87	132	2	0	0	0	0	0	0	0	0
13168	45.33	19.85	87	8	47	47	47	47	47	43	0	47
13168	45.33	19.83	87	8	6	6	6	6	6	6	0	6
13170	45.63	20.03	78	2	0	0	0	0	0	0	0	0
13173	45.40	20.35	80	8	1	2	2	2	2	1	0	2
13173	45.37	20.42	81	8	42	42	42	42	42	40	0	42
13174	45.85	20.47	81	8	55	56	56	56	56	49	0	56
13180	45.05	21.03	91	8	34	34	34	34	34	34	0	34
13183	45.15	21.32	84	8	67	67	67	67	67	52	0	67
13266	45.10	19.55	83	8	42	42	42	42	42	42	0	42
14122	45.90	15.52	155	4	8	8	8	8	8	0	0	8
14232	45.50	15.57	111	12	5	5	5	5	5	0	0	5
14234	46.13	15.88	203	12	7	7	7	7	7	0	0	7
14244	45.50	16.37	106	12	7	7	7	7	7	0	0	7
14248	46.03	16.55	146	4	5	5	5	5	5	0	0	5
14253	45.73	16.85	142	12	7	7	7	7	7	0	0	7
14256	45.88	17.20	263	20	7	7	7	7	7	5	0	7
14279	45.53	18.63	92	4	1	1	1	1	1	0	0	1
14280	45.50	18.57	90	20	5	5	5	5	5	5	0	5
14382	45.15	18.70	98	20	7	7	7	7	7	5	0	7
15004	47.97	23.92	275	8	67	67	67	67	67	40	3	67
15004	47.93	23.92	276	8	10	10	10	10	10	10	0	10
15004	47.93	23.90	276	4	0	0	0	0	0	0	0	0
15010	47.80	22.88	122	8	41	41	41	41	41	15	1	41
15010	47.78	22.90	122	2	0	0	0	0	0	0	0	0
15010	47.78	22.88	122	8	24	24	24	24	24	23	0	24
15010	47.72	22.88	124	2	0	0	0	0	0	0	0	0
15014	47.67	23.58	193	2	0	0	0	0	0	0	0	0
15014	47.67	23.50	218	2	0	0	0	0	0	0	0	0
15014	47.65	23.48	217	4	0	0	0	0	0	0	0	0
15015	47.78	23.93	498	6	1	1	1	1	1	1	0	1
15015	47.73	23.95	503	8	0	0	0	0	0	0	0	0
15032	47.58	24.67	2303	2	0	0	0	0	0	0	0	0
15033	47.53	24.88	1785	2	0	0	0	0	0	0	0	0
15033	47.61	24.65	1785	2	0	0	0	0	0	0	0	0
15033	47.60	24.65	1786	2	0	0	0	0	0	0	0	0
15042	47.37	22.08	124	2	0	0	0	0	0	0	0	0
15042	47.37	22.10	113	2	0	0	0	0	0	0	0	0
15042	47.35	22.10	113	2	0	0	0	0	0	0	0	0
15042	47.33	22.08	113	2	0	0	0	0	0	0	0	0
15044	47.47	22.78	162	2	0	0	0	0	0	0	0	0
15044	47.47	22.80	162	2	0	0	0	0	0	0	0	0
15044	47.45	22.78	160	2	0	0	0	0	0	0	0	0
15047	47.43	23.87	365	2	0	0	0	0	0	0	0	0
15063	47.20	23.05	295	8	24	24	24	25	24	21	0	24
15063	47.18	23.08	294	8	15	15	15	15	15	15	0	15
15063	47.18	23.03	296	4	0	0	0	0	0	0	0	0
15063	47.18	23.05	294	1	0	0	0	0	0	0	0	0
15080	47.05	21.93	137	8	53	53	53	53	53	38	0	53
15080	47.05	22.00	136	4	0	0	0	0	0	0	0	0
15080	47.03	21.90	140	2	0	0	0	0	0	0	0	0
15080	47.03	21.88	137	4	0	0	0	0	0	0	0	0
15083	47.15	23.87	232	2	0	0	0	0	0	0	0	0
15083	47.13	23.90	236	2	0	0	0	0	0	0	0	0
15083	47.12	23.88	236	2	0	0	0	0	0	0	0	0
15085	47.15	24.52	366	8	32	33	33	33	33	23	1	33
15085	47.15	24.60	366	4	0	0	0	0	0	0	0	0
15085	47.13	24.50	367	8	15	15	15	15	15	15	1	15
15085	47.15	24.50	367	2	0	0	0	0	0	0	0	0
15095	46.98	22.58	295	2	0	0	0	0	0	0	0	0
15095	46.98	22.63	317	2	0	0	0	0	0	0	0	0
15095	46.98	22.60	317	2	0	0	0	0	0	0	0	0
15099	46.85	23.06	565	8	1	1	1	1	1	0	0	1
15099	46.87	23.05	561	2	0	0	0	0	0	0	0	0
15099	46.85	23.08	561	1	0	0	0	0	0	0	0	0
15117	46.77	22.12	170	2	0	0	0	0	0	0	0	0
15117	46.78	22.13	161	2	0	0	0	0	0	0	0	0
15117	46.78	22.12	164	2	0	0	0	0	0	0	0	0
15117	46.78	22.08	165	4	0	0	0	0	0	0	0	0
15118	46.68	22.62	1117	2	0	0	0	0	0	0	0	0
15119	46.77	22.78	1838	2	0	0	0	0	0	0	0	0
15119	46.76	22.78	1838	4	0	0	0	0	0	0	0	0
15119	46.75	22.80	1848	2	0	0	0	0	0	0	0	0
15119	46.77	22.80	1840	2	0	0	0	0	0	0	0	0
15120	46.78	23.57	415	8	85	85	85	85	85	59	2	85
15120	46.78	23.60	410	2	0	0	0	0	0	0	0	0
15120	46.78	23.56	415	2	0	0	0	0	0	0	0	0
15120	46.77	23.57	411	24	3	3	3	3	3	3	0	3
15123	46.75	24.17	334	2	0	0	0	0	0	0	0	0
15123	46.73	24.15	398	2	0	0	0	0	0	0	0	0
15124	46.88	24.65	448	1	0	0	0	0	0	0	0	0
15124	46.88	24.63	450	4	0	0	0	0	0	0	0	0
15136	46.53	21.50	96	1	0	0	0	0	0	0	0	0
15136	46.53	21.52	96	2	0	0	0	0	0	0	0	0
15136	46.53	21.53	97	2	0	0	0	0	0	0	0	0
15136	46.52	21.53	96	4	0	0	0	0	0	0	0	0
15138	46.62	21.52	589	2	0	0	0	0	0	0	0	0
15140	46.53	22.45	500	2	0	0	0	0	0	0	0	0
15143	46.58	23.67	408	2	0	0	0	0	0	0	0	0
15143	46.57	23.78	430	2	0	0	0	0	0	0	0	0
15143	46.58	23.78	428	1	0	0	0	0	0	0	0	0
15145	46.53	24.53	308	8	38	38	38	38	38	37	1	38
15158	46.40	21.65	112	2	0	0	0	0	0	0	0	0
15159	46.38	21.82	697	2	0	0	0	0	0	0	0	0
15160	46.53	22.47	272	2	0	0	0	0	0	0	0	0
15160	46.62	22.42	279	4	0	0	0	0	0	0	0	0
15160	46.52	22.45	279	4	0	0	0	0	0	0	0	0
15162	46.35	23.07	546	2	0	0	0	0	0	0	0	0
15162	46.35	23.06	575	8	1	1	1	1	1	0	0	1
15162	46.37	23.05	583	2	0	0	0	0	0	0	0	0
15163	46.57	23.37	1384	2	0	0	0	0	0	0	0	0
15163	46.56	23.36	1384	2	0	0	0	0	0	0	0	0
15163	46.58	23.47	1353	2	0	0	0	0	0	0	0	0
15163	46.53	23.32	1356	2	0	0	0	0	0	0	0	0
15179	46.27	21.67	473	2	0	0	0	0	0	0	0	0
15179	46.27	21.68	473	2	0	0	0	0	0	0	0	0
15182	46.27	22.38	163	2	0	0	0	0	0	0	0	0
15182	46.27	22.35	179	2	0	0	0	0	0	0	0	0
15182	46.28	22.33	179	1	0	0	0	0	0	0	0	0
15182	46.27	22.37	178	4	0	0	0	0	0	0	0	0
15184	46.17	24.35	1186	2	0	0	0	0	0	0	0	0
15184	46.32	23.13	1196	2	0	0	0	0	0	0	0	0
15189	46.23	24.60	318	2	3	3	3	3	3	3	0	3
15189	46.22	24.58	319	4	0	0	0	0	0	0	0	0
15199	46.07	20.62	84	2	0	0	0	0	0	0	0	0
15199	46.08	20.63	84	2	0	0	0	0	0	0	0	0
15200	46.17	21.32	109	8	31	31	31	31	31	0	0	31
15200	46.17	21.40	108	4	0	0	0	0	0	0	0	0
15200	46.13	21.35	118	8	35	35	35	35	35	34	0	35
15200	46.13	21.40	118	8	10	10	10	10	10	10	0	10
15200	46.20	21.40	118	8	17	17	17	17	17	17	0	17
15204	46.02	22.15	156	2	0	0	0	0	0	0	0	0
15206	46.13	22.78	265	2	0	0	0	0	0	0	0	0
15206	46.17	22.72	264	2	0	0	0	0	0	0	0	0
15206	46.17	22.67	264	2	0	0	0	0	0	0	0	0
15208	46.07	23.58	253	2	0	0	0	0	0	0	0	0
15208	46.07	23.57	247	2	0	0	0	0	0	0	0	0
15208	46.05	23.55	247	2	0	0	0	0	0	0	0	0
15209	46.18	23.92	334	8	37	38	38	38	37	34	0	37
15209	46.18	23.93	334	2	0	0	0	0	0	0	0	0
15209	46.17	23.93	334	2	0	0	0	0	0	0	0	0
15230	45.88	22.90	194	8	63	63	63	63	63	38	0	63
15230	45.87	22.90	231	8	11	11	11	11	11	11	0	11
15230	45.85	22.88	241	24	3	3	3	3	3	3	0	3
15231	45.95	23.57	253	2	0	0	0	0	0	0	0	0
15231	45.97	23.57	253	2	0	0	0	0	0	0	0	0
15231	45.97	23.55	254	2	0	0	0	0	0	0	0	0
15231	45.95	23.53	254	4	0	0	0	0	0	0	0	0
15235	45.85	24.98	428	8	40	40	40	41	40	37	1	40
15235	45.83	24.93	429	2	0	0	0	0	0	0	0	0
15245	45.78	20.70	80	2	0	0	0	0	0	0	0	0
15247	45.77	21.25	91	8	46	46	46	46	46	37	0	46
15247	45.77	21.30	89	2	0	0	0	0	0	0	0	0
15254	45.67	23.92	1478	1	0	0	0	0	0	0	0	0
15254	45.66	23.68	1478	4	0	0	0	0	0	0	0	0
15254	45.65	23.92	1454	2	0	0	0	0	0	0	0	0
15254	45.65	23.93	1454	2	0	0	0	0	0	0	0	0
15260	45.80	24.15	452	8	67	67	67	67	67	59	2	67
15260	45.80	24.20	445	2	0	0	0	0	0	0	0	0
15267	45.67	20.95	85	2	0	0	0	0	0	0	0	0
15267	45.67	20.93	61	2	0	0	0	0	0	0	0	0
15270	45.68	21.90	123	2	0	0	0	0	0	0	0	0
15270	45.68	21.92	125	2	0	0	0	0	0	0	0	0
15273	45.57	22.88	381	2	0	0	0	0	0	0	0	0
15277	45.63	24.27	517	2	0	0	0	0	0	0	0	0
15277	45.63	24.25	517	2	0	0	0	0	0	0	0	0
15277	45.65	24.27	519	2	0	0	0	0	0	0	0	0
15279	45.60	24.63	2040	2	0	0	0	0	0	0	0	0
15279	45.60	24.62	2037	2	0	0	0	0	0	0	0	0
15289	45.38	21.13	83	2	3	3	3	3	3	3	0	3
15292	45.42	22.25	242	8	89	89	89	89	89	61	1	89
15292	45.40	22.30	242	2	0	0	0	0	0	0	0	0
15296	45.42	23.38	583	8	19	25	25	25	25	21	0	25
15297	45.43	23.63	1404	2	0	0	0	0	0	0	0	0
15297	45.35	24.25	1346	2	0	0	0	0	0	0	0	0
15298	45.25	24.25	1640	2	0	0	0	0	0	0	0	0
15299	45.43	24.38	584	6	1	1	1	1	1	0	0	1
15314	45.30	21.92	281	2	0	0	0	0	0	0	0	0
15314	45.32	21.88	280	4	0	0	0	0	0	0	0	0
15315	45.12	21.97	1432	2	0	0	0	0	0	0	0	0
15315	45.11	21.96	1432	2	0	0	0	0	0	0	0	0
15315	45.08	22.08	1445	2	0	0	0	0	0	0	0	0
15315	45.18	22.05	1433	2	0	0	0	0	0	0	0	0
15316	45.30	22.52	1500	2	0	0	0	0	0	0	0	0
15316	45.30	22.51	1500	2	0	0	0	0	0	0	0	0
15317	45.25	22.52	2180	2	0	0	0	0	0	0	0	0
15317	45.25	22.51	2180	2	0	0	0	0	0	0	0	0
15317	45.28	22.53	2180	2	0	0	0	0	0	0	0	0
15319	45.42	23.97	587	2	0	0	0	0	0	0	0	0
15319	45.38	23.96	587	6	1	1	1	1	1	0	0	1
15319	45.42	23.95	587	2	0	0	0	0	0	0	0	0
15320	45.38	23.47	1585	2	0	0	0	0	0	0	0	0
15320	45.38	23.46	1585	2	0	0	0	0	0	0	0	0
15321	45.35	23.52	2075	2	0	0	0	0	0	0	0	0
15338	45.03	21.68	308	8	39	39	39	39	39	34	0	39
15338	45.03	21.70	310	4	0	0	0	0	0	0	0	0
15340	45.03	23.28	205	8	47	47	47	47	47	36	1	47
15340	45.03	23.27	206	2	0	0	0	0	0	0	0	0
15341	45.02	22.87	250	2	0	0	0	0	0	0	0	0
15341	45.02	22.85	262	2	0	0	0	0	0	0	0	0
15341	45.00	22.87	259	2	0	0	0	0	0	0	0	0
15341	45.00	22.85	251	2	0	0	0	0	0	0	0	0
15344	45.18	23.82	530	2	0	0	0	0	0	0	0	0
15344	45.18	23.80	530	2	0	0	0	0	0	0	0	0
15345	45.03	24.53	548	2	0	0	0	0	0	0	0	0
15345	45.00	24.53	550	2	0	0	0	0	0	0	0	0
15346	45.10	24.37	243	8	87	87	87	87	87	58	1	87
15346	45.08	24.37	238	24	3	3	3	3	3	3	0	3
15347	45.13	24.68	448	2	0	0	0	0	0	0	0	0
15347	45.17	24.67	449	2	0	0	0	0	0	0	0	0
21073	54.67	21.07	43	1	0	0	0	0	0	0	0	0
26607	54.95	20.47	37	2	0	0	0	0	0	0	0	0
26607	54.95	20.18	37	2	0	0	0	0	0	0	0	0
26607	54.95	20.17	37	2	0	0	0	0	0	0	0	0
26629	54.88	23.88	75	8	65	65	65	65	65	12	0	65
26629	54.53	23.53	75	1	0	0	0	0	0	0	0	0
26629	54.87	23.90	75	4	0	0	0	0	0	0	0	0
26629	54.87	23.88	75	2	6	6	6	6	6	0	0	6
26629	54.88	23.83	77	8	29	29	29	29	29	19	0	29
26701	54.73	20.48	2	2	0	0	0	0	0	0	0	0
26701	54.32	19.92	4	2	0	0	0	0	0	0	0	0
26702	54.70	20.62	27	8	71	71	71	71	71	8	0	71
26702	54.42	20.37	27	1	0	0	0	0	0	0	0	0
26702	54.70	20.70	20	4	0	0	0	0	0	0	0	0
26702	54.72	20.55	21	8	29	29	29	29	29	0	0	29
26704	54.48	20.00	23	2	6	6	6	6	6	0	0	6
26704	54.47	19.95	23	2	3	3	3	3	3	0	0	3
26705	54.40	20.63	67	2	0	0	0	0	0	0	0	0
26706	54.37	21.30	49	4	14	14	14	14	14	0	0	14
26711	54.63	21.82	32	2	0	0	0	0	0	0	0	0
26711	54.62	21.82	32	2	0	0	0	0	0	0	0	0
26713	54.63	22.57	57	2	0	0	0	0	0	0	0	0
26713	54.65	22.75	57	2	5	5	5	5	5	0	0	5
26713	54.65	22.77	57	2	0	0	0	0	0	0	0	0
26713	54.63	22.78	59	8	17	17	17	17	17	14	0	17
26728	54.22	23.82	91	2	0	0	0	0	0	0	0	0
26728	54.02	23.98	91	2	0	0	0	0	0	0	0	0
26728	54.23	23.52	133	8	11	11	11	11	11	5	0	11
26737	54.22	24.58	109	2	0	0	0	0	0	0	0	0
26737	54.22	24.55	109	2	0	0	0	0	0	0	0	0
26737	54.25	24.55	111	8	16	16	16	16	16	12	0	16
26825	53.68	23.83	152	8	65	65	65	65	65	18	0	65
26825	53.41	23.50	152	1	0	0	0	0	0	0	0	0
26825	53.68	23.90	152	4	0	0	0	0	0	0	0	0
26825	53.60	24.05	134	8	29	29	29	29	29	16	0	29
26834	53.62	24.77	178	2	6	6	6	6	6	0	0	6
26923	53.17	24.45	152	2	0	0	0	0	0	0	0	0
26923	53.10	24.27	152	1	0	0	0	0	0	0	0	0
26923	53.17	24.50	152	2	0	0	0	0	0	0	0	0
26929	52.55	24.47	167	2	0	0	0	0	0	0	0	0
26929	52.57	24.47	167	2	4	4	4	3	4	0	0	3
26929	52.57	24.50	167	2	0	0	0	0	0	0	0	0
33001	52.35	23.40	163	2	0	0	0	0	0	0	0	0
33001	52.37	23.38	163	2	0	0	0	0	0	0	0	0
33008	52.12	23.68	144	8	93	93	93	93	93	27	0	93
33008	52.07	23.41	144	1	0	0	0	0	0	0	0	0
33008	52.12	23.70	143	4	0	0	0	0	0	0	0	0
33008	52.12	23.67	143	8	13	13	13	13	13	0	0	13
33067	51.37	23.98	171	2	0	0	0	0	0	0	0	0
33067	51.43	24.43	171	2	0	0	0	0	0	0	0	0
33173	51.22	24.68	176	2	0	0	0	0	0	0	0	0
33173	51.13	24.41	176	1	0	0	0	0	0	0	0	0
33173	51.22	24.70	176	2	0	0	0	0	0	0	0	0
33177	50.83	24.32	193	8	87	86	86	87	87	25	0	87
33177	50.50	24.19	193	1	0	0	0	0	0	0	0	0
33177	50.83	24.40	193	4	0	0	0	0	0	0	0	0
33287	50.25	23.63	249	2	0	0	0	0	0	0	0	0
33287	50.15	23.38	249	1	0	0	0	0	0	0	0	0
33287	50.25	23.70	249	2	0	0	0	0	0	0	0	0
33288	50.12	24.35	228	2	0	0	0	0	0	0	0	0
33288	50.10	24.35	228	2	0	0	0	0	0	0	0	0
33391	49.80	23.15	216	2	0	0	0	0	0	0	0	0
33393	49.82	23.95	325	8	99	99	99	99	99	17	0	99
33393	49.49	23.57	325	1	0	0	0	0	0	0	0	0
33393	49.82	24.00	334	4	0	0	0	0	0	0	0	0
33398	49.35	23.55	276	2	4	4	4	4	4	0	0	4
33398	49.21	23.33	276	1	0	0	0	0	0	0	0	0
33398	49.35	23.40	276	4	0	0	0	0	0	0	0	0
33398	49.35	23.38	276	2	2	2	2	2	2	0	0	2
33398	49.35	23.52	276	2	0	0	0	0	0	0	0	0
33409	49.43	24.95	301	2	0	0	0	0	0	0	0	0
33409	49.26	24.57	301	1	0	0	0	0	0	0	0	0
33409	49.43	25.00	301	2	0	0	0	0	0	0	0	0
33511	49.15	23.03	588	2	5	5	5	5	5	0	0	5
33514	49.00	22.90	195	2	0	0	0	0	0	0	0	0
33514	48.90	22.47	195	2	0	0	0	0	0	0	0	0
33515	49.03	23.52	549	2	0	0	0	0	0	0	0	0
33516	48.97	24.00	341	2	0	0	0	0	0	0	0	0
33516	49.07	23.87	341	4	17	17	17	17	16	0	0	16
33517	48.63	22.80	198	2	0	0	0	0	0	0	0	0
33517	48.73	22.47	198	2	0	0	0	0	0	0	0	0
33526	48.90	24.70	276	8	64	65	65	65	65	7	0	65
33526	48.54	24.42	276	1	0	0	0	0	0	0	0	0
33526	48.97	24.40	280	8	29	29	29	29	29	10	0	29
33631	48.63	22.27	118	8	97	97	97	97	97	20	0	97
33631	48.38	22.16	118	1	0	0	0	0	0	0	0	0
33631	48.63	22.30	118	4	0	0	0	0	0	0	0	0
33634	48.22	22.67	119	2	0	0	0	0	0	0	0	0
33634	48.40	22.70	119	2	2	2	2	2	2	0	0	2
33638	48.18	23.30	182	2	0	0	0	0	0	0	0	0
33638	48.18	23.32	182	2	5	5	5	5	5	0	0	5
33645	48.40	24.60	731	2	0	0	0	0	0	0	0	0
33645	48.27	24.37	731	2	0	0	0	0	0	0	0	0
33646	48.42	24.95	400	2	0	0	0	0	0	0	0	0
33647	48.07	24.18	576	2	0	0	0	0	0	0	0	0
33647	48.05	24.20	576	4	17	17	17	17	17	0	0	17
1415	38.88	5.63	14	8	1	1	1	1	1	1	0	1
7500	44.63	-1.25	9	4	35	35	35	35	35	15	0	35
7500	44.63	-1.92	10	2	0	0	0	0	0	0	0	0
7502	44.53	-1.13	25	8	49	48	48	49	49	45	7	49
7502	44.53	-1.10	25	2	0	0	0	0	0	0	0	0
7503	44.37	-1.13	31	2	0	0	0	0	0	0	0	0
7503	44.43	-1.25	3	4	32	31	31	32	32	21	0	32
7510	44.83	-0.70	49	8	68	68	68	68	68	46	4	68
7510	44.83	-0.68	61	24	15	15	15	15	15	15	0	15
7517	44.18	-0.28	133	4	6	6	6	6	6	0	0	6
7517	44.18	-0.27	132	2	0	0	0	0	0	0	0	0
7524	44.17	0.60	61	2	4	4	4	4	4	2	0	4
7524	44.18	0.60	60	4	58	58	58	58	58	55	0	58
7528	44.87	0.52	33	2	0	0	0	0	0	0	0	0
7528	44.83	0.52	33	8	0	6	6	6	5	6	0	5
7529	44.82	0.52	51	16	43	43	43	43	43	42	5	43
7535	44.75	1.40	259	8	86	86	86	86	85	57	1	85
7540	44.03	1.38	108	12	25	25	25	25	25	25	0	25
7549	44.88	2.42	639	4	37	37	37	37	36	25	0	36
7549	44.90	2.42	639	14	31	31	31	31	31	29	2	31
7552	44.40	2.48	580	2	2	2	2	2	2	2	0	2
7552	44.42	2.48	579	2	0	0	0	0	0	0	0	0
7554	44.53	3.45	934	2	0	0	0	0	0	0	0	0
7555	44.18	2.52	1020	2	0	0	0	0	0	0	0	0
7558	44.12	3.02	715	4	84	84	84	84	84	52	0	84
7558	44.12	3.10	715	2	0	0	0	0	0	0	0	0
7560	44.12	3.58	1567	6	1	8	8	8	8	7	0	8
7570	44.53	4.37	280	1	0	0	0	0	0	0	0	0
7577	44.58	4.73	73	4	72	72	72	72	72	56	0	72
7577	44.58	4.80	73	4	0	0	0	0	0	0	0	0
7579	44.13	4.87	60	8	13	13	13	13	13	0	0	13
7579	44.13	4.83	60	4	55	55	55	55	55	48	0	55
7579	44.13	4.85	55	12	6	6	6	6	6	6	0	6
7585	44.17	5.27	1903	4	1	1	1	1	1	0	0	1
7586	44.08	5.05	99	4	28	28	28	28	28	22	0	28
7586	44.08	5.07	105	4	8	8	8	8	8	8	0	8
7587	44.68	5.70	1037	4	8	11	11	11	11	0	0	11
7587	44.68	5.72	1061	4	0	1	1	1	0	1	0	0
7588	44.07	6.00	460	4	66	66	66	66	66	45	0	66
7588	44.07	5.98	461	12	8	8	8	8	8	8	0	8
7591	44.57	6.50	871	4	12	35	35	35	35	0	0	35
7593	44.90	6.65	1328	2	0	0	0	0	0	0	0	0
7593	44.92	6.65	1336	2	0	0	0	0	0	0	0	0
7598	44.00	7.13	331	2	0	0	0	0	0	0	0	0
7600	43.40	-1.68	25	4	18	20	20	18	18	16	0	18
7600	43.40	1.68	47	6	12	12	12	12	12	1	0	12
7602	43.47	-1.52	75	4	21	21	21	21	21	0	0	21
7602	43.47	-1.50	75	2	0	0	0	0	0	0	0	0
7602	43.47	-1.53	71	8	61	61	61	61	61	61	0	61
7603	43.68	-1.07	32	4	42	42	42	42	42	19	0	42
7603	43.68	-1.00	32	2	0	0	0	0	0	0	0	0
7603	43.70	-1.07	33	12	5	4	4	5	5	5	0	5
7607	43.92	-0.52	62	8	15	15	15	15	15	0	0	15
7607	43.92	-0.50	62	8	58	58	58	58	58	57	0	58
7610	43.38	-0.42	188	8	82	82	82	82	82	61	3	82
7610	43.38	-0.40	188	4	0	0	0	0	0	0	0	0
7621	43.18	0.00	379	6	68	68	68	68	68	58	1	68
7622	43.68	0.60	128	14	50	50	50	50	50	40	8	50
7623	43.62	0.57	173	2	0	0	0	0	0	0	0	0
7623	43.63	0.60	137	4	6	6	6	6	6	0	0	6
7624	43.92	0.85	253	1	0	0	0	0	0	0	0	0
7627	43.02	1.10	417	4	5	5	5	5	5	0	0	5
7627	43.00	1.10	417	4	61	61	61	61	61	47	5	61
7630	43.63	1.37	152	8	73	73	73	73	73	53	1	73
7630	43.63	1.40	152	4	0	0	0	0	0	0	0	0
7630	43.63	1.36	153	4	1	1	1	1	1	0	0	1
7630	43.62	1.38	158	20	8	8	8	8	8	8	0	8
7631	43.53	1.37	166	10	20	20	20	20	20	20	0	20
7632	43.91	2.11	178	4	1	1	1	1	1	1	0	1
7635	43.22	2.32	130	4	72	72	72	72	72	56	4	72
7635	43.22	2.40	130	2	0	0	0	0	0	0	0	0
7637	43.98	2.60	667	1	0	0	0	0	0	0	0	0
7639	43.21	3.15	7	1	0	0	0	0	0	0	0	0
7640	43.92	2.10	167	2	0	0	0	0	0	0	0	0
7640	43.92	2.12	178	14	41	41	41	41	41	41	0	41
7641	43.40	3.68	94	8	29	28	28	29	29	25	0	29
7641	43.40	3.70	81	4	6	6	6	6	6	6	0	6
7643	43.58	3.97	5	8	70	70	70	70	70	61	0	70
7643	43.58	4.00	5	4	0	0	0	0	0	0	0	0
7645	43.87	4.40	60	8	56	56	56	56	56	53	3	56
7645	43.85	4.40	62	8	3	3	3	3	3	3	0	3
7646	43.77	4.42	94	2	6	6	6	6	6	5	0	6
7646	43.75	4.42	94	4	36	36	36	36	36	16	0	36
7647	43.52	4.92	23	4	22	22	22	22	22	14	0	22
7647	43.52	4.93	23	8	39	39	39	39	39	25	0	39
7648	43.60	5.12	59	2	6	6	6	6	6	6	0	6
7648	43.60	5.10	60	4	30	30	30	30	30	20	0	29
7649	43.50	5.37	111	4	22	21	21	21	22	13	0	21
7650	43.45	5.22	1	8	16	16	16	16	16	16	0	16
7650	43.45	5.21	8	4	1	1	1	1	1	0	0	1
7650	43.45	5.23	36	24	45	45	45	45	45	45	27	45
7652	43.27	5.30	70	6	19	20	20	19	19	0	0	19
7653	43.33	5.05	27	8	22	22	22	22	22	19	0	22
7656	43.18	5.58	327	4	12	12	12	12	12	0	0	12
7657	44.05	5.48	837	2	0	0	0	0	0	0	0	0
7660	43.10	5.93	28	8	60	60	60	60	60	35	0	60
7660	43.10	6.00	28	4	0	0	0	0	0	0	0	0
7661	43.08	5.93	0	8	43	44	44	44	44	43	0	44
7661	43.08	5.10	9999	2	0	0	0	0	0	0	0	0
7661	43.08	6.10	-9999	2	3	3	3	3	3	0	0	3
7661	43.08	5.95	136	8	5	5	5	5	5	5	0	5
7666	42.93	3.05	45	2	0	0	0	0	0	0	0	0
7666	42.92	3.07	50	4	12	12	12	12	12	12	0	12
7667	43.10	6.15	3	4	61	61	61	61	61	39	0	61
7668	43.10	6.36	175	2	0	2	2	0	0	0	0	0
7670	43.00	6.23	145	2	29	26	26	32	32	11	0	32
7672	43.61	6.21	500	2	0	0	0	0	0	0	0	0
7675	43.38	6.38	80	4	46	46	46	46	46	29	0	46
7677	43.20	6.68	106	4	11	11	11	11	11	0	0	11
7678	43.03	6.47	131	4	20	20	20	20	20	5	0	20
7680	43.42	6.75	2	4	25	25	25	25	25	9	0	25
7681	43.41	6.85	126	1	0	2	2	0	0	0	0	0
7682	43.75	6.92	1269	2	0	0	0	0	0	0	0	0
7684	43.55	6.95	3	4	28	28	28	28	28	15	0	28
7684	43.53	6.95	8	8	0	0	0	0	0	0	0	0
7686	43.72	7.12	299	2	0	0	0	0	0	0	0	0
7688	43.57	7.13	74	4	19	19	19	19	19	0	0	19
7690	43.67	7.22	4	6	15	15	15	15	15	0	0	15
7690	43.65	7.20	4	8	67	67	67	67	67	61	0	67
7695	43.68	7.33	138	2	24	25	25	26	26	6	0	26
7720	42.93	0.15	2883	2	0	0	0	0	0	0	0	0
7738	42.50	1.98	1430	2	0	0	0	0	0	0	0	0
7738	42.48	1.98	1432	2	0	0	0	0	0	0	0	0
7740	42.45	2.00	1328	2	0	0	0	0	0	0	0	0
7742	42.60	2.41	450	2	0	0	0	0	0	0	0	0
7747	42.73	2.87	44	8	76	76	76	76	76	53	0	76
7747	42.73	2.90	44	4	0	0	0	0	0	0	0	0
7747	42.73	2.86	48	4	1	1	1	1	1	0	0	1
7747	42.73	2.88	47	14	8	8	8	8	8	8	0	8
7749	42.52	3.13	100	4	58	58	58	58	58	41	0	58
7752	41.92	8.62	40	2	0	0	0	0	0	0	0	0
7752	41.91	8.61	152	4	0	2	2	2	2	0	0	2
7753	42.63	8.91	129	6	0	0	0	0	0	0	0	0
7753	42.63	8.92	129	6	17	17	17	17	17	12	0	17
7754	42.53	8.80	64	4	48	48	48	48	48	39	0	48
7754	42.52	8.80	58	12	5	5	5	5	5	5	0	5
7754	42.52	8.78	58	14	3	3	3	3	3	3	0	3
7756	42.52	8.68	295	6	15	15	15	15	15	0	0	15
7761	41.92	8.80	5	8	61	61	61	61	61	60	0	61
7761	41.91	8.80	9	4	1	1	1	1	1	0	0	1
7765	41.92	9.40	8	4	44	43	43	44	44	36	0	44
7765	41.92	9.42	22	14	2	2	2	2	2	2	0	2
7768	41.60	9.37	62	2	12	12	12	12	12	0	0	12
7770	41.37	9.18	105	2	40	39	39	40	38	36	0	38
7770	41.37	9.17	110	8	17	17	17	17	17	17	0	17
7770	41.38	9.18	116	8	3	3	3	3	3	3	0	3
7775	42.27	9.53	77	8	4	4	4	4	4	4	0	4
7775	42.27	9.55	74	8	8	8	8	8	8	8	0	8
7780	41.50	9.10	86	4	39	40	40	40	40	26	0	40
7780	41.52	9.10	23	10	8	8	8	8	8	8	0	8
7785	43.00	9.37	108	6	52	52	52	52	52	4	0	52
7785	42.10	9.35	113	6	5	5	5	5	5	5	0	5
7785	43.00	9.35	113	6	3	3	3	3	3	3	0	3
7790	42.55	9.48	8	8	83	83	83	83	83	61	0	83
7790	42.55	9.50	8	4	0	0	0	0	0	0	0	0
7791	42.80	9.48	120	2	12	12	12	12	12	0	0	12
7795	42.23	9.18	570	2	0	0	0	0	0	0	0	0
7796	42.08	9.08	610	2	0	0	0	0	0	0	0	0
8001	43.38	-8.37	57	2	11	10	10	11	11	0	0	11
8001	43.37	-8.40	58	2	0	0	0	0	0	0	0	0
8001	43.37	-8.42	58	8	62	62	62	62	62	60	0	62
8001	43.36	-8.41	67	4	1	1	1	1	1	0	0	1
8002	43.30	-8.38	97	2	0	0	0	0	0	0	0	0
8003	43.47	-8.32	241	2	0	0	0	0	0	0	0	0
8003	43.48	-8.32	241	2	0	0	0	0	0	0	0	0
8003	43.45	-8.28	244	2	0	0	0	0	0	0	0	0
8004	43.78	-7.67	220	2	0	0	0	0	0	0	0	0
8005	43.47	-8.23	6	2	0	0	0	0	0	0	0	0
8005	43.48	-8.23	9	2	0	0	0	0	0	0	0	0
8007	43.17	-8.52	608	1	0	0	0	0	0	0	0	0
8008	43.25	-7.48	443	8	24	24	24	24	24	12	0	24
8008	43.12	-7.45	446	4	38	38	38	38	38	0	0	38
8011	43.57	-6.03	126	4	8	8	8	8	8	8	0	8
8011	43.55	-6.03	126	4	46	46	46	46	46	1	0	46
8014	43.55	-5.67	29	2	12	12	12	12	12	0	0	12
8014	43.55	-5.60	29	2	0	0	0	0	0	0	0	0
8014	43.53	-5.63	10	4	32	32	32	32	32	0	0	32
8014	43.57	-5.70	6	4	14	13	13	14	14	0	0	14
8015	43.35	-5.87	335	8	74	74	74	74	74	59	0	74
8021	43.43	-3.83	5	2	0	0	0	0	0	0	0	0
8021	43.43	-3.82	1	4	33	33	33	33	33	9	0	33
8023	43.47	-3.78	66	4	17	17	17	17	17	0	0	17
8023	43.47	-3.80	66	4	0	0	0	0	0	0	0	0
8023	43.47	-3.82	66	8	45	45	45	45	45	38	0	45
8023	43.48	-3.80	59	8	22	22	22	22	22	22	0	22
8024	43.38	-3.12	86	2	0	0	0	0	0	0	0	0
8025	43.30	-2.92	40	2	6	6	6	6	6	0	0	6
8025	43.30	-2.93	40	4	42	42	42	42	41	0	0	41
8025	43.30	-2.90	39	4	15	15	15	15	15	14	0	15
8027	43.32	-2.05	259	6	32	32	32	32	32	9	0	32
8027	43.32	-2.00	259	2	0	0	0	0	0	0	0	0
8027	43.31	-2.05	259	4	1	1	1	1	1	0	0	1
8027	43.30	-2.05	259	8	34	34	34	34	34	28	0	34
8027	43.30	-2.03	259	8	15	15	15	15	15	15	0	15
8029	43.35	-1.78	5	4	10	10	10	10	10	0	0	10
8029	43.35	-1.80	5	4	49	49	49	49	48	0	0	48
8029	43.37	-1.78	24	2	1	1	1	1	1	0	0	1
8040	42.88	-9.27	146	2	0	0	0	0	0	0	0	0
8042	42.90	-8.42	370	4	16	16	16	16	16	0	0	16
8042	42.90	-8.40	370	2	0	0	0	0	0	0	0	0
8042	42.90	-8.43	367	4	51	52	52	52	51	10	0	51
8043	42.40	-8.70	3	2	1	1	1	1	1	0	0	1
8044	42.43	-8.60	45	2	0	0	0	0	0	0	0	0
8044	42.43	-8.65	18	2	14	14	14	14	14	0	0	14
8044	42.43	-8.62	108	4	35	34	34	35	35	0	0	35
8045	42.23	-8.65	248	6	16	16	16	16	16	0	0	16
8045	42.23	-8.60	248	2	0	0	0	0	0	0	0	0
8045	42.23	-8.63	248	8	30	30	30	30	30	24	0	30
8045	42.22	-8.63	256	8	34	34	34	34	34	28	0	34
8046	42.23	-8.72	48	2	0	0	0	0	0	0	0	0
8046	42.23	-8.70	48	2	0	0	0	0	0	0	0	0
8046	42.23	-8.73	85	2	0	0	0	0	0	0	0	0
8046	42.23	-8.75	85	2	0	0	0	0	0	0	0	0
8048	42.33	-7.87	147	4	43	39	39	43	43	0	0	43
8053	42.53	-6.58	544	4	34	33	33	34	34	0	0	34
8053	42.57	-6.60	550	4	14	12	12	14	14	0	0	14
8055	42.58	-5.65	926	4	11	31	31	32	31	0	0	31
8055	42.58	-5.60	926	2	0	0	0	0	0	0	0	0
8071	42.00	-4.53	758	2	0	0	0	0	0	0	0	0
8071	42.02	-4.53	758	2	0	0	0	0	0	0	0	0
8075	42.37	-3.65	890	4	10	15	15	15	15	0	0	15
8075	42.37	-3.60	890	4	0	0	0	0	0	0	0	0
8075	42.37	-3.63	890	4	0	11	11	12	12	0	0	12
8075	42.35	-3.63	890	4	0	3	3	3	3	0	0	3
8076	42.33	-3.70	854	2	2	2	2	2	2	0	0	2
8080	42.85	-2.65	516	2	0	0	0	0	0	0	0	0
8080	42.88	-2.73	510	4	18	18	18	18	18	0	0	18
8080	42.88	-2.72	510	4	36	36	36	36	36	8	0	36
8080	42.88	-2.65	510	2	0	0	0	0	0	0	0	0
8083	42.47	-2.43	379	2	0	0	0	0	0	0	0	0
8083	42.48	-2.45	379	2	0	0	0	0	0	0	0	0
8083	42.47	-2.38	369	2	0	0	0	0	0	0	0	0
8084	42.45	-2.32	353	8	22	22	22	22	22	0	0	22
8084	42.45	-2.30	353	4	0	0	0	0	0	0	0	0
8084	42.45	-2.33	363	8	61	61	61	61	61	53	0	61
8085	42.77	-1.63	454	4	63	63	63	63	63	8	0	63
8086	42.82	-1.65	466	2	2	2	2	2	2	0	0	2
8086	42.82	-1.50	461	1	0	0	0	0	0	0	0	0
8087	42.20	-1.45	295	1	0	0	0	0	0	0	0	0
8091	42.57	-3.13	800	2	0	0	0	0	0	0	0	0
8094	42.08	-0.32	540	2	0	0	0	0	0	0	0	0
8094	42.08	-0.33	541	4	32	32	32	32	32	0	0	32
8094	42.08	-0.30	541	2	0	0	0	0	0	0	0	0
8096	42.78	-0.53	1605	2	0	0	0	0	0	0	0	0
8112	42.20	0.87	800	2	0	0	0	0	0	0	0	0
8117	42.35	1.82	1711	2	0	0	0	0	0	0	0	0
8117	42.35	1.97	1714	2	0	1	1	1	1	0	0	1
8117	42.33	1.93	1711	2	0	0	0	0	0	0	0	0
8130	41.50	-5.75	669	4	23	22	22	23	23	0	0	23
8130	41.50	-5.70	670	2	0	0	0	0	0	0	0	0
8130	41.50	-5.73	670	4	18	18	18	18	18	0	0	18
8130	41.52	-5.73	667	4	13	13	13	13	13	0	0	13
8140	41.70	-4.85	845	4	2	2	2	2	2	0	0	2
8140	41.72	-4.85	845	4	0	8	8	9	9	0	0	9
8140	41.72	-4.80	845	1	0	0	0	0	0	0	0	0
8141	41.63	-4.73	715	8	21	21	21	21	21	0	0	21
8141	41.70	-4.72	692	4	27	27	27	27	27	0	0	27
8141	41.50	-4.75	696	8	6	6	6	6	6	4	0	6
8141	41.65	-4.75	696	8	8	8	8	8	8	6	0	8
8141	41.65	-4.77	735	8	49	48	48	49	49	44	0	49
8148	41.77	-2.47	1079	4	1	23	23	24	23	0	0	23
8148	41.77	-2.40	1079	2	0	0	0	0	0	0	0	0
8157	41.12	-1.42	788	2	0	0	0	0	0	0	0	0
8157	41.12	-1.40	788	2	0	0	0	0	0	0	0	0
8159	41.67	-1.02	257	8	50	50	50	50	50	41	0	50
8160	41.73	-0.87	247	6	18	18	18	18	18	0	0	18
8160	41.65	-1.00	257	2	3	3	3	3	3	0	0	3
8160	41.66	-1.01	258	4	1	1	1	1	1	0	0	1
8160	41.67	-1.00	258	8	15	15	15	15	15	15	0	15
8161	41.65	-0.88	237	2	0	0	0	0	0	0	0	0
8161	41.65	-0.80	237	2	0	0	0	0	0	0	0	0
8161	41.63	-0.90	222	1	0	0	0	0	0	0	0	0
8171	41.62	0.63	203	4	35	34	34	35	35	0	0	34
8171	41.63	0.60	199	4	14	14	14	14	14	0	0	14
8175	41.15	1.17	76	4	51	52	52	51	52	11	0	51
8175	41.15	1.20	76	2	0	0	0	0	0	0	0	0
8175	41.15	1.12	117	2	0	0	0	0	0	0	0	0
8176	41.12	1.25	20	2	0	0	0	0	0	0	0	0
8180	41.42	2.15	95	2	2	2	2	2	2	0	0	2
8180	41.40	2.20	93	2	0	0	0	0	0	0	0	0
8180	41.40	2.15	93	2	0	0	0	0	0	0	0	0
8180	41.40	2.18	12	2	0	0	0	0	0	0	0	0
8180	41.42	2.13	176	2	0	0	0	0	0	0	0	0
8181	41.30	2.10	4	8	16	16	16	16	16	0	0	16
8181	41.28	2.10	4	2	0	0	0	0	0	0	0	0
8181	41.28	2.07	4	8	66	66	66	66	66	61	0	66
8181	41.28	2.06	6	4	1	1	1	1	1	0	0	1
8182	41.78	2.43	1707	2	0	0	0	0	0	0	0	0
8183	41.92	2.77	143	2	0	0	0	0	0	0	0	0
8183	41.98	2.83	98	2	0	0	0	0	0	0	0	0
8184	41.90	2.77	143	8	57	57	57	57	57	40	0	57
8186	41.63	2.02	1092	2	0	0	0	0	0	0	0	0
8201	40.95	-5.65	787	2	0	0	0	0	0	0	0	0
8202	40.93	-5.45	791	8	11	16	16	15	15	0	0	15
8202	40.95	-5.50	793	8	0	15	15	15	15	7	0	15
8210	40.65	-4.70	1148	4	3	20	20	20	20	0	0	20
8210	40.67	-4.52	1131	2	0	0	0	0	0	0	0	0
8213	40.88	-4.13	1001	2	3	3	3	3	3	0	0	3
8213	40.95	-4.10	1005	1	0	0	0	0	0	0	0	0
8213	40.95	-4.13	1005	2	0	0	0	0	0	0	0	0
8213	40.95	-4.12	1015	4	0	7	7	7	7	0	0	7
8215	40.78	-4.00	1894	2	0	1	1	1	1	0	0	1
8215	40.78	-4.02	1888	4	0	7	7	7	7	0	0	7
8220	40.67	-3.77	823	2	0	0	0	0	0	0	0	0
8220	40.45	-3.71	669	2	0	0	0	0	0	0	0	0
8220	40.45	-3.72	669	2	0	0	0	0	0	0	0	0
8221	40.47	-3.57	601	8	21	21	21	21	21	0	0	21
8221	40.47	-3.50	609	4	0	0	0	0	0	0	0	0
8221	40.45	-3.58	582	8	14	14	14	14	14	12	0	14
8221	40.45	-3.55	582	8	49	49	49	49	49	49	0	49
8221	40.50	-3.58	633	8	0	0	0	0	0	0	0	0
8222	40.50	-3.45	610	6	5	5	5	5	5	0	0	5
8222	40.42	-3.68	667	1	0	0	0	0	0	0	0	0
8223	40.35	-3.75	690	2	0	0	0	0	0	0	0	0
8223	40.38	-3.78	690	2	0	0	0	0	0	0	0	0
8224	40.30	-3.72	620	4	52	53	53	51	53	0	0	51
8226	40.63	-3.22	699	2	0	0	0	0	0	0	0	0
8226	40.63	-3.17	730	4	3	4	4	4	4	0	0	4
8226	40.67	-3.17	640	4	14	12	12	14	14	0	0	14
8227	40.48	-3.45	607	2	0	0	0	0	0	0	0	0
8231	40.07	-2.13	957	4	1	13	13	12	12	0	0	12
8231	40.07	-2.12	975	2	0	6	6	6	6	0	0	6
8232	40.85	-1.88	1056	2	0	0	0	0	0	0	0	0
8232	40.85	-1.80	1056	2	0	0	0	0	0	0	0	0
8233	40.90	-1.28	904	8	12	21	21	21	21	0	0	21
8233	40.87	-1.30	932	2	0	2	2	2	2	0	0	2
8233	40.86	-1.30	933	2	0	0	0	0	0	0	0	0
8233	40.93	-1.30	889	2	0	0	0	0	0	0	0	0
8235	40.35	-1.10	915	2	0	0	0	0	0	0	0	0
8235	40.33	-1.10	915	2	0	4	4	4	4	0	0	4
8235	40.35	-1.12	902	4	0	27	27	27	27	0	0	27
8238	40.82	0.50	44	4	68	69	68	69	69	0	0	69
8261	39.48	-6.37	460	4	35	35	35	35	35	1	0	35
8261	39.48	-6.30	460	4	0	0	0	0	0	0	0	0
8261	39.47	-6.33	405	8	49	49	49	49	49	40	0	49
8261	39.47	-6.37	405	2	0	0	0	0	0	0	0	0
8272	39.87	-4.03	553	4	5	5	5	5	5	0	0	5
8272	39.85	-4.03	553	4	11	11	11	12	11	0	0	11
8272	39.88	-4.05	516	4	45	45	45	45	45	0	0	45
8280	39.00	-1.85	680	8	20	20	20	20	20	0	0	20
8280	38.95	-1.87	702	4	3	3	3	3	3	0	0	3
8280	38.95	-1.85	704	8	61	61	61	61	61	58	0	61
8282	39.43	-1.75	762	2	0	0	0	0	0	0	0	0
8284	39.48	-0.48	65	8	16	16	16	16	16	0	0	16
8284	39.50	-0.40	65	2	0	0	0	0	0	0	0	0
8284	39.50	-0.47	65	8	66	66	66	66	66	61	0	66
8284	39.50	-0.46	62	4	1	1	1	1	1	0	0	1
8285	39.47	-0.38	18	2	0	0	0	0	0	0	0	0
8285	39.48	-0.30	13	2	0	0	0	0	0	0	0	0
8285	39.48	-0.38	13	2	0	0	0	0	0	0	0	0
8286	39.98	-0.03	51	2	1	1	1	1	1	0	0	1
8286	39.95	-0.07	49	4	34	34	34	34	34	0	0	34
8290	39.15	-0.43	20	2	0	0	0	0	0	0	0	0
8303	39.73	2.72	1015	2	0	0	0	0	0	0	0	0
8306	39.55	2.73	4	8	83	83	83	83	83	61	0	83
8306	39.55	2.80	4	4	0	0	0	0	0	0	0	0
8307	39.90	3.10	3	2	0	0	0	0	0	0	0	0
8314	39.88	4.27	43	8	21	21	21	21	21	0	0	21
8314	39.87	4.22	91	4	4	4	4	4	4	0	0	4
8314	39.86	4.23	82	4	1	1	1	1	1	0	0	1
8314	39.87	4.23	82	8	61	61	61	61	61	58	0	61
8314	39.88	4.25	55	2	0	0	0	0	0	0	0	0
8329	38.88	-6.97	198	2	0	0	0	0	0	0	0	0
8330	38.90	-6.97	195	2	5	5	5	5	5	0	0	5
8330	38.88	-6.82	185	4	42	42	42	42	42	0	0	42
8330	38.88	-6.83	192	8	15	15	15	15	15	12	0	15
8335	38.52	-5.12	550	4	24	24	24	24	24	0	0	24
8348	38.98	-3.93	628	8	24	24	24	24	24	0	0	24
8348	38.98	-3.90	628	4	0	0	0	0	0	0	0	0
8348	38.98	-3.92	628	8	60	60	60	60	60	41	0	60
8358	38.38	-0.52	91	2	0	0	0	0	0	0	0	0
8359	38.37	-0.50	81	2	0	0	0	0	0	0	0	0
8360	38.28	-0.50	43	4	0	0	0	0	0	0	0	0
8360	38.28	-0.55	43	8	80	80	80	80	80	61	0	80
8360	38.38	-0.57	60	2	0	0	0	0	0	0	0	0
8361	38.65	-0.27	1498	2	0	0	0	0	0	0	0	0
8362	38.52	-0.15	10	2	0	0	0	0	0	0	0	0
8365	38.83	0.10	15	2	0	0	0	0	0	0	0	0
8373	38.87	1.37	8	8	23	23	23	23	23	0	0	23
8373	38.87	1.40	8	4	0	0	0	0	0	0	0	0
8373	38.87	1.38	12	8	46	46	46	46	46	45	0	46
8373	38.88	1.38	17	8	7	7	7	7	7	7	0	7
8373	38.88	1.37	17	8	8	8	8	8	8	8	0	8
8383	37.27	-6.95	18	2	1	1	1	1	1	0	0	1
8383	37.27	-6.90	18	1	0	0	0	0	0	0	0	0
8383	37.25	-6.95	18	2	2	3	3	3	2	0	0	2
8383	37.28	-6.92	20	4	38	37	37	38	38	0	0	38
8384	37.10	-6.73	41	2	0	0	0	0	0	0	0	0
8390	37.37	-6.00	13	2	1	1	1	1	1	0	0	1
8391	37.42	-5.90	27	8	83	83	83	83	83	34	0	83
8391	37.41	-5.90	31	4	1	1	1	1	1	0	0	1
8391	37.42	-5.88	20	2	0	0	0	0	0	0	0	0
8397	37.17	-5.57	104	2	5	5	5	5	5	0	0	5
8397	37.15	-5.60	86	4	4	4	4	4	4	0	0	4
8397	37.15	-5.62	88	4	28	28	28	28	28	0	0	28
8397	37.17	-5.62	88	4	8	8	8	8	8	0	0	8
8410	37.85	-4.85	91	4	55	55	55	55	55	8	0	55
8410	37.85	-4.83	90	8	28	28	28	28	28	15	0	28
8417	37.80	-3.80	582	2	0	0	0	0	0	0	0	0
8417	37.78	-3.80	580	4	18	18	18	19	19	0	0	19
8419	37.18	-3.70	567	4	0	0	0	0	0	0	0	0
8419	37.18	-3.78	567	8	74	74	74	74	74	59	0	74
8420	37.15	-3.58	689	2	11	11	11	11	11	0	0	11
8429	37.95	-1.23	75	4	53	53	53	53	53	0	0	53
8430	37.98	-1.13	63	2	0	0	0	0	0	0	0	0
8430	37.98	-1.10	63	1	0	0	0	0	0	0	0	0
8430	37.98	-1.12	57	2	0	0	0	0	0	0	0	0
8430	38.00	-1.17	62	8	37	37	37	37	37	37	0	37
8431	37.58	-0.98	204	2	0	0	0	0	0	0	0	0
8431	37.58	-1.00	219	2	0	0	0	0	0	0	0	0
8433	37.78	-0.80	16	4	80	80	80	79	79	21	0	79
8449	36.65	-6.30	26	2	0	0	0	0	0	0	0	0
8450	36.65	-6.35	27	2	5	5	5	5	5	0	4	5
8451	36.75	-6.05	26	2	1	1	1	1	1	0	0	1
8451	36.75	-6.00	26	2	0	0	0	0	0	0	0	0
8451	36.75	-6.07	26	4	60	60	60	60	60	21	0	60
8451	36.75	-6.13	56	2	0	0	0	0	0	0	0	0
8452	36.53	-6.30	14	2	0	0	0	0	0	0	0	0
8452	36.53	-6.28	32	2	1	3	3	2	1	0	0	1
8453	36.47	-6.20	29	2	0	0	0	0	0	0	0	0
8458	36.00	-5.60	46	4	24	24	24	24	24	0	0	24
8458	36.02	-5.60	20	2	0	0	0	0	0	0	0	0
8482	36.67	-4.50	16	8	15	15	15	15	15	0	0	15
8482	36.67	-4.40	11	4	0	0	0	0	0	0	0	0
8482	36.67	-4.48	11	8	67	67	67	67	67	61	0	67
8482	36.66	-4.48	8	2	0	0	0	0	0	0	0	0
8487	36.85	-2.30	15	4	0	0	0	0	0	0	0	0
8487	36.85	-2.37	15	8	18	18	18	18	18	0	0	18
8487	36.85	-2.38	21	8	61	61	61	61	61	53	0	61
8488	36.83	-2.47	6	4	2	2	2	2	2	0	0	2
8489	36.83	-2.08	485	1	0	0	0	0	0	0	0	0
8490	35.95	-3.02	5	2	0	0	0	0	0	0	0	0
8490	35.93	-3.03	19	2	0	0	0	0	0	0	0	0
8495	36.15	-5.35	2	24	77	77	77	77	77	55	0	77
8495	36.15	-5.30	5	4	0	0	0	0	0	0	0	0
8495	36.15	-5.33	4	4	1	1	1	1	1	0	0	1
8530	39.35	-9.40	34	4	46	31	32	51	51	25	0	51
8532	38.83	-9.33	130	4	25	25	25	25	25	6	0	25
8534	38.70	-9.05	11	2	0	0	0	0	0	0	0	0
8534	38.70	-9.03	11	4	26	26	26	26	26	12	0	26
8535	38.72	-9.15	95	24	22	23	23	23	23	23	0	23
8536	38.77	-9.13	106	8	70	70	70	70	70	54	0	70
8536	38.78	-9.10	114	4	0	0	0	0	0	0	0	0
8536	38.78	-9.13	114	8	14	14	14	14	14	7	0	14
8536	38.76	-9.13	110	4	1	1	1	1	1	0	0	1
8537	38.88	-9.03	3	2	0	0	0	0	0	0	0	0
8538	36.98	-8.95	48	8	34	33	33	34	34	11	1	34
8538	36.98	-8.90	40	4	0	0	0	0	0	0	0	0
8538	37.00	-8.95	25	6	48	47	47	48	48	48	0	48
8539	39.12	-8.98	49	2	0	0	0	0	0	0	0	0
8540	39.83	-8.88	54	4	26	26	26	26	26	11	0	26
8541	37.95	-8.86	103	2	0	0	0	0	0	0	0	0
8541	37.95	-8.87	103	24	27	27	27	27	27	26	0	27
8542	37.95	-8.88	16	2	1	1	1	1	1	0	0	1
8543	41.68	-8.83	10	2	0	0	0	0	0	0	0	0
8543	41.70	-8.80	16	8	50	50	50	50	50	46	0	50
8544	40.92	-8.63	22	4	19	19	19	19	19	5	0	19
8545	41.23	-8.68	79	8	77	77	77	77	77	60	0	77
8545	41.23	-8.60	76	2	0	0	0	0	0	0	0	0
8545	41.23	-8.67	76	4	5	5	5	5	5	0	0	5
8546	41.13	-8.60	100	2	0	0	0	0	0	0	0	0
8547	40.65	-8.73	19	2	0	0	0	0	0	0	0	0
8548	40.15	-8.47	179	24	28	28	28	28	28	28	0	28
8549	40.20	-8.42	140	8	57	57	57	57	57	32	0	57
8549	40.20	-8.40	141	4	0	0	0	0	0	0	0	0
8550	39.07	-8.40	167	2	0	0	0	0	0	0	0	0
8551	41.63	-8.80	48	8	7	8	8	8	8	8	0	8
8553	39.48	-8.43	80	2	0	0	0	0	0	0	0	0
8554	37.02	-7.92	37	2	23	23	23	21	21	4	1	21
8554	37.02	-7.97	8	8	65	65	65	65	65	61	0	65
8557	38.57	-7.90	321	8	31	31	31	31	31	25	0	31
8558	38.53	-7.90	246	8	28	28	28	28	28	28	0	28
8560	40.72	-7.88	644	24	26	26	26	26	26	26	0	26
8561	38.07	-7.92	203	4	23	24	24	24	24	10	0	24
8562	38.02	-7.87	247	8	82	82	82	82	83	59	2	82
8562	38.02	-7.80	246	4	0	0	0	0	0	0	0	0
8566	41.32	-7.73	479	4	42	41	41	42	42	23	0	42
8566	41.32	-7.70	481	4	0	0	0	0	0	0	0	0
8567	41.27	-7.72	562	24	27	27	27	27	27	27	0	27
8568	40.42	-7.55	1386	2	12	21	21	21	21	7	0	21
8568	40.42	-7.50	1380	2	0	0	0	0	0	0	0	0
8570	39.83	-7.48	384	24	29	29	29	29	29	28	0	29
8571	39.28	-7.42	542	8	84	84	84	84	84	59	2	84
8571	39.28	-7.40	541	4	0	0	0	0	0	0	0	0
8575	41.82	-6.67	718	8	21	21	21	21	21	0	0	21
8575	41.82	-6.77	691	8	5	5	5	5	5	2	0	5
8575	41.81	-6.76	692	4	1	1	1	1	1	0	0	1
8575	41.80	-6.73	692	8	59	59	59	59	59	59	0	59
8616	41.72	7.47	360	24	0	0	0	0	0	0	0	0
8912	42.95	-0.83	1434	8	10	13	13	13	13	12	0	13
8920	42.82	-0.28	2180	1	0	0	0	0	0	0	0	0
8922	42.77	-0.23	1660	8	10	12	12	12	12	11	0	12
8926	42.67	0.02	2215	1	0	0	0	0	0	0	0	0
8928	42.68	0.48	1890	2	0	0	0	0	0	0	0	0
8930	42.58	0.53	1540	1	0	0	0	0	0	0	0	0
11509	40.47	14.17	159	8	0	0	0	0	0	0	0	0
13208	44.87	13.85	32	8	25	25	25	25	25	0	0	25
13209	44.90	13.92	67	8	33	33	33	33	33	27	0	33
13214	44.53	14.47	52	2	18	18	18	18	18	0	0	18
13214	44.50	14.50	53	2	0	0	0	0	0	0	0	0
13216	44.75	14.76	19	2	0	0	0	0	0	0	0	0
13216	44.75	14.77	20	12	7	7	7	7	7	0	0	7
13218	44.98	14.90	30	18	4	4	4	4	4	0	0	4
13218	45.00	14.90	28	6	12	12	12	12	12	0	0	12
13219	44.82	14.98	1597	18	0	7	7	7	7	0	0	7
13219	44.80	15.00	1597	2	0	0	0	0	0	0	0	0
13222	44.12	15.23	4	8	10	10	10	10	10	0	0	10
13222	44.13	15.22	7	18	7	7	7	7	7	0	0	7
13222	44.13	15.21	7	2	0	0	0	0	0	0	0	0
13223	44.55	15.37	565	8	25	25	25	25	25	23	0	25
13223	44.60	15.40	565	2	0	0	0	0	0	0	0	0
13224	44.08	15.35	82	4	11	11	11	11	11	0	0	11
13224	44.08	15.40	82	2	0	0	0	0	0	0	0	0
13224	44.10	15.37	84	8	23	23	23	23	23	22	0	23
13228	44.82	15.88	250	8	66	69	69	69	69	22	0	69
13228	44.82	15.90	246	4	0	0	0	0	0	0	0	0
13228	44.80	15.90	250	2	0	0	0	0	0	0	0	0
13232	44.03	16.20	243	12	5	5	5	5	5	0	0	5
13232	44.05	16.23	255	2	0	0	0	0	0	0	0	0
13234	44.38	16.40	485	2	0	0	0	0	0	0	0	0
13237	44.76	16.70	158	2	0	0	0	0	0	0	0	0
13242	44.78	17.22	156	8	79	79	79	79	79	39	0	79
13242	44.78	17.30	153	4	0	0	0	0	0	0	0	0
13242	44.80	17.20	156	2	0	0	0	0	0	0	0	0
13244	44.07	17.47	562	4	38	38	38	38	38	0	0	38
13249	44.22	17.90	348	4	23	24	24	24	24	0	0	24
13257	44.55	18.70	305	4	32	32	32	32	32	1	0	32
13261	44.55	19.23	122	8	87	87	87	87	87	56	0	86
13262	44.55	19.30	121	4	0	0	0	0	0	0	0	0
13266	44.97	19.63	81	8	6	13	13	13	13	8	0	13
13269	44.28	19.92	174	2	11	11	11	11	11	6	0	11
13269	44.38	19.92	388	8	4	4	4	4	4	4	0	4
13269	44.32	19.92	177	8	39	39	39	39	39	39	0	39
13272	44.82	20.32	101	8	7	7	7	7	7	0	0	7
13272	44.82	20.28	96	8	66	66	66	66	66	61	0	66
13272	44.81	20.28	99	4	1	1	1	1	1	0	0	1
13272	44.80	20.30	99	2	0	0	0	0	0	0	0	0
13274	44.82	20.30	101	8	15	15	15	15	15	0	0	15
13274	44.80	20.47	132	8	55	55	55	55	55	52	0	55
13275	44.78	20.53	243	2	0	0	0	0	0	0	0	0
13275	44.77	20.42	204	2	0	0	0	0	0	0	0	0
13276	44.30	20.53	696	2	0	0	0	0	0	0	0	0
13278	44.03	20.93	190	8	6	6	6	6	6	6	0	6
13279	44.37	20.97	104	2	2	2	2	2	2	0	0	2
13279	44.37	20.95	121	8	55	55	55	55	55	49	0	55
13279	44.40	21.00	122	1	0	0	0	0	0	0	0	0
13285	44.75	21.52	84	8	55	55	55	55	55	52	0	55
13285	44.77	21.52	79	2	0	0	0	0	0	0	0	0
13286	44.22	22.53	40	2	0	0	0	0	0	0	0	0
13289	44.17	21.97	820	2	0	0	0	0	0	0	0	0
13289	44.12	21.95	1039	8	0	6	6	7	7	7	0	7
13294	44.66	22.75	44	2	0	0	0	0	0	0	0	0
13295	44.23	22.55	42	8	66	66	66	66	66	56	0	66
13295	44.20	22.60	44	2	0	0	0	0	0	0	0	0
13322	43.85	15.20	35	6	7	7	7	7	7	0	0	7
13322	43.85	15.91	35	2	0	0	0	0	0	0	0	0
13329	43.73	15.90	77	2	1	1	1	1	1	0	0	1
13329	43.73	15.92	75	6	21	21	21	21	21	0	0	21
13329	43.70	15.90	75	2	0	0	0	0	0	0	0	0
13330	43.05	16.10	20	12	5	5	5	5	5	0	0	5
13332	43.53	16.30	24	8	44	44	44	44	44	29	0	44
13333	43.52	16.43	129	8	19	19	19	19	19	7	0	19
13333	43.50	16.30	21	2	0	0	0	0	0	0	0	0
13334	43.50	16.45	49	8	2	2	2	2	2	0	0	2
13334	43.50	16.40	128	2	0	0	0	0	0	0	0	0
13335	43.17	16.45	25	18	9	9	9	9	9	0	0	9
13335	43.20	16.50	25	2	0	0	0	0	0	0	0	0
13340	43.83	17.02	728	4	2	7	7	7	7	0	0	7
13340	43.80	17.00	728	2	0	0	0	0	0	0	0	0
13344	43.03	17.41	4	2	0	0	0	0	0	0	0	0
13348	43.35	17.80	99	8	47	47	47	47	47	39	0	47
13348	43.40	17.80	108	2	0	0	0	0	0	0	0	0
13349	43.33	17.82	108	2	0	0	0	0	0	0	0	0
13351	43.72	18.27	2070	8	0	7	7	7	7	7	0	7
13353	43.83	18.35	523	8	20	25	25	25	25	0	0	25
13353	43.83	18.33	503	4	3	3	3	3	3	0	0	3
13353	43.82	18.33	511	8	24	24	24	24	24	20	0	24
13354	43.87	18.43	637	8	41	41	41	41	41	36	0	41
13354	43.90	18.40	638	2	0	0	0	0	0	0	0	0
13356	43.23	18.60	1306	2	0	0	0	0	0	0	0	0
13361	43.15	19.13	1450	6	0	7	7	7	7	1	0	7
13363	43.35	19.35	784	8	17	29	29	29	29	19	0	29
13367	43.73	19.72	1029	2	0	8	8	8	8	7	0	8
13367	43.70	19.70	1029	1	0	0	0	0	0	0	0	0
13369	43.27	20.00	1039	2	0	0	0	0	0	0	0	0
13369	43.27	20.02	1015	2	0	0	0	0	0	0	0	0
13369	43.25	19.97	1244	2	0	0	0	0	0	0	0	0
13369	43.28	20.00	1039	8	0	7	7	7	7	7	0	7
13370	43.85	20.03	312	2	0	0	0	0	0	0	0	0
13370	43.83	20.03	312	4	42	42	42	42	42	41	0	42
13376	43.73	20.70	219	2	0	0	0	0	0	0	0	0
13376	43.55	20.70	217	8	2	2	2	2	2	2	0	2
13376	43.70	20.70	217	8	39	39	39	39	39	39	0	39
13377	43.73	20.68	221	8	45	45	45	45	45	15	0	45
13378	43.28	20.80	1713	8	0	7	7	7	7	7	0	7
13382	43.13	21.27	380	2	10	10	10	10	9	5	0	9
13383	43.57	21.35	166	8	44	44	44	44	44	42	0	44
13384	43.93	21.38	123	8	54	54	54	54	54	49	0	54
13388	43.33	21.90	202	8	84	84	84	84	84	56	0	84
13388	43.30	21.90	202	1	0	0	0	0	0	0	0	0
13389	43.02	21.95	220	2	0	0	0	0	0	0	0	0
13389	43.02	21.93	224	2	0	0	0	0	0	0	0	0
13389	42.98	21.95	232	8	46	46	46	46	46	42	0	46
13392	43.88	22.30	137	2	0	0	0	0	0	0	0	0
13397	43.02	22.75	446	8	49	49	49	49	49	44	0	49
13397	43.35	22.75	450	8	5	5	5	5	5	5	0	5
13432	42.40	16.26	82	2	0	0	0	0	0	0	0	0
13432	42.40	16.30	97	2	0	0	0	0	0	0	0	0
13438	42.40	16.27	82	6	7	6	6	7	5	0	0	5
13439	42.77	16.90	187	4	10	10	10	10	10	0	0	10
13451	42.57	18.27	165	8	35	35	35	35	35	28	0	35
13451	42.65	18.08	53	18	7	7	7	7	7	0	0	7
13452	42.57	18.30	161	2	0	0	0	0	0	0	0	0
13453	42.88	18.45	491	1	0	0	0	0	0	0	0	0
13455	42.47	18.52	30	2	0	0	0	0	0	0	0	0
13455	42.40	18.73	5	8	56	55	55	56	56	55	0	56
13455	42.47	18.50	42	2	4	4	4	4	4	0	0	4
13455	42.45	18.55	10	6	25	24	24	25	25	2	0	25
13457	42.73	18.73	5	2	0	0	0	0	0	0	0	0
13457	42.40	18.70	5	1	0	0	0	0	0	0	0	0
13459	42.77	18.95	649	8	50	50	50	50	50	29	0	50
13461	42.10	19.10	2	6	29	29	29	29	29	5	0	29
13462	42.37	19.25	31	8	80	80	80	80	80	52	0	80
13462	42.37	19.30	37	2	0	0	0	0	0	0	0	0
13462	42.36	19.25	33	4	0	0	0	0	0	0	0	0
13462	42.40	19.30	33	2	0	0	0	0	0	0	0	0
13463	42.43	19.28	50	8	19	19	19	19	19	12	0	19
13465	42.83	19.53	950	6	0	7	7	7	7	0	0	7
13468	42.83	19.86	670	2	0	0	0	0	0	0	0	0
13472	42.67	20.30	501	8	61	61	61	61	61	33	0	61
13473	42.70	20.30	499	1	0	0	0	0	0	0	0	0
13477	42.22	20.73	402	8	36	36	36	36	36	29	0	36
13478	42.01	20.88	1750	2	0	0	0	0	0	0	0	0
13481	42.65	21.15	573	8	34	33	33	34	34	26	0	34
13482	42.38	21.16	580	1	0	0	0	0	0	0	0	0
13483	41.98	21.47	241	8	6	6	6	6	6	0	0	6
13483	41.97	21.63	238	6	10	10	10	10	10	0	0	10
13489	42.55	21.92	434	8	57	56	56	57	57	52	0	57
13489	42.60	21.90	434	2	0	0	0	0	0	0	0	0
13492	42.20	22.33	693	8	62	62	62	62	62	4	0	62
13492	41.02	20.88	1750	4	0	3	3	3	3	0	0	3
13493	42.20	22.30	696	1	0	0	0	0	0	0	0	0
13516	43.51	18.45	1073	1	0	0	0	0	0	0	0	0
13562	41.92	19.22	100	8	71	71	71	71	71	29	0	71
13562	41.92	19.30	97	4	0	0	0	0	0	0	0	0
13562	41.90	19.20	29	2	0	0	0	0	0	0	0	0
13575	41.85	20.87	885	4	0	0	0	1	1	0	0	1
13576	41.70	20.75	1240	1	0	0	0	0	0	0	0	0
13577	41.53	20.70	1332	2	0	5	5	5	5	0	0	5
13578	41.12	20.80	760	2	0	7	7	7	7	0	0	7
13579	41.11	20.80	760	2	0	0	0	0	0	0	0	0
13579	41.10	28.82	700	8	4	4	4	4	4	4	0	4
13579	41.10	20.82	700	8	24	24	24	24	24	24	0	24
13580	40.85	21.07	910	4	0	1	1	1	1	0	0	1
13581	41.22	21.47	-9999	4	0	0	0	1	1	0	0	1
13582	41.05	21.37	588	8	56	55	55	56	56	4	0	56
13584	41.70	21.41	2540	2	0	0	0	0	0	0	0	0
13584	41.73	21.52	2540	4	0	7	7	7	7	0	0	7
13585	41.33	21.57	673	6	29	30	30	30	30	0	0	30
13586	41.95	21.70	232	4	0	0	0	0	0	0	0	0
13586	41.95	21.63	232	2	4	4	4	4	4	0	0	4
13586	41.96	21.65	239	2	0	0	0	0	0	0	0	0
13586	41.97	21.65	239	8	60	60	60	60	60	60	0	60
13586	42.00	21.70	239	2	0	0	0	0	0	0	0	0
13588	42.02	21.40	301	4	1	1	1	1	1	0	0	1
13590	41.90	21.85	856	4	0	1	1	1	1	0	0	1
13591	41.75	22.18	296	6	48	48	48	48	48	0	0	48
13591	41.80	22.20	327	1	0	0	0	0	0	0	0	0
13592	41.42	22.25	125	6	64	65	65	65	65	0	0	65
13592	41.45	22.30	125	2	0	0	0	0	0	0	0	0
13592	41.45	22.25	125	2	5	5	5	5	5	0	0	5
13592	41.40	22.30	126	2	0	0	0	0	0	0	0	0
13593	41.30	22.42	1030	4	0	0	0	1	1	0	0	1
13594	41.88	22.50	513	4	1	1	1	1	1	0	0	1
13595	41.43	22.65	-9999	4	0	1	1	1	1	0	0	1
13597	41.15	22.50	59	4	21	19	19	21	21	0	0	21
13598	41.72	22.85	828	6	0	7	7	7	7	0	0	7
13598	41.70	22.90	836	1	0	0	0	0	0	0	0	0
13600	42.10	19.53	43	2	20	21	21	21	21	15	0	21
13601	41.33	19.80	97	1	0	0	0	0	0	0	0	0
13610	42.03	20.42	354	2	5	6	6	5	5	1	0	5
13610	42.03	20.41	358	2	0	0	0	0	0	0	0	0
13611	41.30	19.45	15	4	14	15	15	14	14	8	0	14
13612	41.30	19.47	8	2	0	0	0	0	0	0	0	0
13615	41.33	19.78	89	2	22	22	22	22	22	14	0	22
13619	41.68	20.43	657	2	9	10	10	10	9	4	0	9
13622	40.47	19.48	3	2	18	22	22	22	22	16	0	22
13622	41.46	19.48	5	2	0	0	0	0	0	0	0	0
13624	40.80	19.90	32	4	20	20	20	20	20	15	0	20
13625	40.08	20.15	193	2	7	7	7	7	7	2	0	7
13629	40.60	20.77	900	4	22	22	22	22	22	16	0	22
13629	40.60	20.76	900	4	0	0	0	0	0	0	0	0
14314	44.53	14.48	53	18	5	5	5	5	5	0	0	5
14431	44.10	15.35	82	8	7	7	7	7	7	6	0	7
14441	43.05	16.03	20	12	2	2	2	2	2	0	0	2
14452	42.43	16.90	187	10	2	2	2	2	2	0	0	2
14454	43.28	17.02	49	12	7	7	7	7	7	0	0	7
14457	43.45	17.22	435	2	0	0	0	0	0	0	0	0
14462	43.03	17.42	5	12	2	2	2	2	2	0	0	2
14462	43.03	17.43	5	12	5	5	5	5	5	0	0	5
14537	44.77	16.70	158	4	4	19	19	19	19	0	0	19
14543	44.35	17.27	431	4	13	13	13	13	13	0	0	13
14554	44.88	18.43	140	4	4	20	20	20	20	0	0	20
14640	43.08	17.02	728	4	0	2	2	2	2	0	0	2
14650	43.77	18.03	972	4	0	7	7	7	7	0	0	7
15341	45.00	22.87	259	2	0	0	0	0	0	0	0	0
15341	45.00	22.85	251	2	0	0	0	0	0	0	0	0
15345	45.00	24.53	550	2	0	0	0	0	0	0	0	0
15356	45.00	27.72	20	2	0	0	0	0	0	0	0	0
15363	44.83	21.75	90	2	0	0	0	0	0	0	0	0
15364	44.93	22.00	240	2	0	0	0	0	0	0	0	0
15364	44.92	22.00	257	4	0	0	0	0	0	0	0	0
15366	44.95	23.52	177	2	0	0	0	0	0	0	0	0
15366	44.88	22.42	177	2	0	0	0	0	0	0	0	0
15369	44.92	23.73	262	2	0	0	0	0	0	0	0	0
15369	44.87	23.72	262	2	0	0	0	0	0	0	0	0
15369	44.87	23.70	265	2	0	0	0	0	0	0	0	0
15369	44.88	23.70	265	1	0	0	0	0	0	0	0	0
15373	44.87	24.87	307	2	11	11	11	11	11	3	0	11
15373	44.88	24.83	295	2	0	0	0	0	0	0	0	0
15373	44.85	24.82	315	2	0	0	0	0	0	0	0	0
15373	44.83	24.85	317	4	0	0	0	0	0	0	0	0
15375	44.93	25.43	282	8	37	37	37	37	37	34	1	37
15375	44.92	25.42	297	4	0	0	0	0	0	0	0	0
15377	44.95	26.00	178	8	47	47	47	47	47	35	1	47
15377	44.57	26.00	177	1	0	0	0	0	0	0	0	0
15377	44.95	25.98	178	4	0	0	0	0	0	0	0	0
15387	44.90	29.60	2	2	3	3	3	3	3	3	0	3
15387	44.90	29.69	1	2	0	0	0	0	0	0	0	0
15387	44.88	29.58	2	2	0	0	0	0	0	0	0	0
15388	44.73	21.62	82	2	0	0	0	0	0	0	0	0
15388	44.72	21.62	82	2	0	0	0	0	0	0	0	0
15388	44.72	21.63	84	2	0	0	0	0	0	0	0	0
15389	44.65	21.95	68	2	0	0	0	0	0	0	0	0
15395	44.67	24.27	280	2	0	0	0	0	0	0	0	0
15395	44.65	24.27	280	2	0	0	0	0	0	0	0	0
15395	44.67	24.28	282	2	0	0	0	0	0	0	0	0
15395	44.67	24.23	281	4	0	0	0	0	0	0	0	0
15402	44.72	26.65	55	2	0	0	0	0	0	0	0	0
15402	44.72	26.63	62	2	0	0	0	0	0	0	0	0
15405	44.75	27.30	51	8	42	42	42	42	42	35	1	42
15405	44.73	27.28	51	4	0	0	0	0	0	0	0	0
15406	44.68	27.93	38	2	0	0	0	0	0	0	0	0
15406	44.68	27.95	38	2	0	0	0	0	0	0	0	0
15408	44.73	28.33	212	2	0	0	0	0	0	0	0	0
15408	44.73	28.35	220	2	0	0	0	0	0	0	0	0
15409	44.77	28.88	27	6	37	37	37	37	37	35	0	37
15409	44.76	28.88	37	4	0	0	0	0	0	0	0	0
15409	44.75	28.87	38	2	0	0	0	0	0	0	0	0
15410	44.63	22.63	78	8	59	59	59	59	59	58	1	59
15410	44.63	22.70	77	2	0	0	0	0	0	0	0	0
15410	44.62	22.62	78	24	3	3	3	3	3	3	0	3
15412	44.47	23.12	309	2	0	0	0	0	0	0	0	0
15412	44.45	23.13	314	2	0	0	0	0	0	0	0	0
15412	44.47	23.10	313	2	0	0	0	0	0	0	0	0
15412	44.48	23.12	313	2	0	0	0	0	0	0	0	0
15416	44.60	24.78	209	2	0	0	0	0	0	0	0	0
15416	44.57	24.78	209	2	0	0	0	0	0	0	0	0
15416	44.55	24.78	210	4	0	0	0	0	0	0	0	0
15416	44.57	24.80	210	1	0	0	0	0	0	0	0	0
15419	44.65	25.57	159	2	0	0	0	0	0	0	0	0
15419	44.65	25.53	159	2	0	0	0	0	0	0	0	0
15419	44.65	25.58	160	2	0	0	0	0	0	0	0	0
15420	44.48	26.13	92	2	6	6	6	6	6	0	0	6
15420	44.50	26.20	94	4	0	0	0	0	0	0	0	0
15420	44.50	26.13	94	8	51	51	51	51	51	44	1	51
15420	44.30	26.08	94	2	0	0	0	0	0	0	0	0
15420	44.83	26.37	91	8	9	9	9	9	9	9	1	9
15420	44.48	26.18	91	8	7	7	7	7	7	7	0	7
15421	44.57	26.10	95	2	0	0	0	0	0	0	0	0
15421	44.55	26.10	95	2	0	0	0	0	0	0	0	0
15422	44.42	26.08	82	2	0	0	0	0	0	0	0	0
15422	44.42	26.10	83	2	0	0	0	0	0	0	0	0
15423	44.42	27.03	51	2	0	0	0	0	0	0	0	0
15423	44.45	26.97	51	2	0	0	0	0	0	0	0	0
15424	44.47	26.52	67	2	0	0	0	0	0	0	0	0
15425	44.38	26.57	52	2	0	0	0	0	0	0	0	0
15425	44.55	27.38	52	2	0	0	0	0	0	0	0	0
15425	44.55	27.40	52	1	0	0	0	0	0	0	0	0
15428	44.68	29.00	6	2	0	0	0	0	0	0	0	0
15428	44.68	28.98	3	4	0	0	0	0	0	0	0	0
15429	44.42	26.65	88	2	0	0	0	0	0	0	0	0
15434	44.38	26.70	177	2	0	0	0	0	0	0	0	0
15434	44.43	24.35	171	2	0	0	0	0	0	0	0	0
15443	44.45	26.92	40	2	0	0	0	0	0	0	0	0
15444	44.37	27.85	58	8	37	37	37	37	37	34	0	37
15444	44.36	27.85	58	2	0	0	0	0	0	0	0	0
15445	44.35	28.05	87	2	0	0	0	0	0	0	0	0
15445	44.33	28.03	88	2	0	0	0	0	0	0	0	0
15450	44.23	23.87	190	8	57	57	57	57	57	39	1	57
15450	44.23	23.90	190	4	0	0	0	0	0	0	0	0
15450	44.20	23.90	195	2	0	0	0	0	0	0	0	0
15450	44.32	23.87	195	8	19	19	19	19	19	19	0	19
15450	44.30	23.87	193	24	3	3	3	3	3	3	0	3
15455	44.28	25.50	108	2	0	0	0	0	0	0	0	0
15455	44.28	25.52	108	2	0	0	0	0	0	0	0	0
15455	44.28	25.53	109	2	0	0	0	0	0	0	0	0
15455	44.27	25.53	107	2	0	0	0	0	0	0	0	0
15460	44.20	27.35	20	8	72	72	72	72	72	48	1	72
15460	44.11	27.21	19	2	0	0	0	0	0	0	0	0
15460	44.20	27.33	20	8	13	13	13	13	13	13	0	13
15462	44.25	28.27	120	2	0	0	0	0	0	0	0	0
15462	44.25	28.28	67	2	0	0	0	0	0	0	0	0
15462	44.23	28.25	71	4	0	0	0	0	0	0	0	0
15465	44.02	23.35	58	2	0	0	0	0	0	0	0	0
15465	44.02	23.33	59	2	0	0	0	0	0	0	0	0
15465	44.02	23.32	58	4	0	0	0	0	0	0	0	0
15469	44.10	24.35	112	2	0	0	0	0	0	0	0	0
15469	44.12	24.35	107	2	0	0	0	0	0	0	0	0
15469	44.10	24.37	107	2	0	0	0	0	0	0	0	0
15470	44.12	25.00	102	8	39	39	39	39	39	37	1	39
15470	44.07	25.00	102	1	0	0	0	0	0	0	0	0
15470	44.10	24.98	103	8	19	19	19	19	19	19	1	19
15470	44.10	24.97	103	24	3	3	3	3	3	3	0	3
15475	44.05	25.77	16	2	0	0	0	0	0	0	0	0
15475	44.07	26.63	16	2	0	0	0	0	0	0	0	0
15476	44.12	26.33	4	2	0	0	0	0	0	0	0	0
15477	44.08	26.63	32	2	0	0	0	0	0	0	0	0
15477	44.52	29.57	14	2	0	0	0	0	0	0	0	0
15479	44.08	27.95	158	2	0	0	0	0	0	0	0	0
15479	44.08	27.97	159	2	0	0	0	0	0	0	0	0
15480	44.22	28.63	32	8	47	47	47	47	47	37	0	47
15480	44.22	28.70	31	4	0	0	0	0	0	0	0	0
15480	44.21	28.63	32	2	0	0	0	0	0	0	0	0
15480	44.13	28.38	17	2	0	0	0	0	0	0	0	0
15480	44.22	28.67	32	8	2	2	2	2	2	2	0	2
15480	44.22	28.65	14	8	19	19	19	19	19	19	0	19
15480	44.20	28.63	14	24	3	3	3	3	3	3	0	3
15481	44.33	28.43	97	2	0	0	0	0	0	0	0	0
15482	43.98	22.95	68	8	37	37	37	37	37	34	1	37
15489	43.98	25.35	75	2	0	0	0	0	0	0	0	0
15489	43.98	25.33	76	2	0	0	0	0	0	0	0	0
15489	43.97	25.35	76	4	0	0	0	0	0	0	0	0
15490	43.75	24.87	31	2	0	0	0	0	0	0	0	0
15490	43.77	24.87	31	8	11	11	11	11	11	8	0	11
15490	43.75	24.88	31	8	29	29	29	29	29	28	1	29
15491	43.88	25.97	17	2	0	0	0	0	0	0	0	0
15491	43.88	25.95	24	2	0	0	0	0	0	0	0	0
15494	43.77	23.95	31	2	0	0	0	0	0	0	0	0
15494	43.78	23.95	40	2	0	0	0	0	0	0	0	0
15494	43.78	23.93	37	4	0	0	0	0	0	0	0	0
15498	43.67	25.35	34	2	0	0	0	0	0	0	0	0
15498	43.65	25.35	35	4	0	0	0	0	0	0	0	0
15499	43.82	28.58	4	8	67	67	67	67	67	38	0	67
15499	43.81	28.58	6	2	0	0	0	0	0	0	0	0
15499	43.49	28.35	6	2	0	0	0	0	0	0	0	0
15499	43.80	28.58	7	4	0	0	0	0	0	0	0	0
15501	44.15	22.78	38	2	2	2	2	2	2	0	0	2
15501	44.17	22.80	38	8	21	21	21	21	21	13	1	21
15502	43.82	22.88	33	8	22	22	22	22	22	12	1	22
15502	43.98	22.85	595	8	11	11	11	11	11	11	0	11
15503	43.83	22.67	253	2	2	2	2	2	2	1	0	2
15505	43.20	23.53	348	8	35	35	35	35	35	20	2	35
15507	43.42	23.22	204	2	0	0	0	0	0	0	0	0
15511	43.82	23.23	33	8	47	47	47	47	47	7	0	47
15511	43.82	23.30	35	4	0	0	0	0	0	0	0	0
15511	43.82	23.25	33	8	51	51	51	51	51	46	2	51
15514	43.73	23.97	31	2	6	6	6	6	6	0	0	6
15514	43.68	23.97	31	8	25	25	25	25	25	16	1	25
15525	43.13	24.72	219	4	24	24	24	24	24	13	1	24
15525	43.15	24.70	221	8	11	11	11	11	11	11	0	11
15526	43.42	24.60	123	8	68	68	68	68	68	37	0	68
15526	43.40	24.60	71	8	20	20	20	20	20	20	1	20
15530	42.75	24.98	197	2	0	0	0	0	0	0	0	0
15530	43.08	25.65	217	8	35	35	35	35	35	20	1	35
15533	43.62	25.35	26	8	34	37	37	37	37	19	1	37
15533	43.61	25.35	25	4	0	0	0	0	0	0	0	0
15533	43.36	25.21	25	2	0	0	0	0	0	0	0	0
15535	43.87	25.97	46	8	38	38	38	38	38	6	0	38
15535	43.87	26.00	48	4	0	0	0	0	0	0	0	0
15535	43.87	25.95	48	8	42	42	42	42	42	32	1	42
15535	43.86	25.95	48	4	0	0	0	0	0	0	0	0
15535	43.87	25.45	46	8	3	3	3	3	3	3	0	3
15535	43.52	25.57	48	4	0	0	0	0	0	0	0	0
15535	43.85	25.95	45	8	52	52	52	52	52	46	2	52
15544	43.27	26.93	219	8	21	21	21	21	21	21	0	21
15544	43.27	27.00	220	2	0	0	0	0	0	0	0	0
15544	43.26	26.93	220	2	0	0	0	0	0	0	0	0
15544	43.16	26.55	220	4	0	0	0	0	0	0	0	0
15546	43.52	26.75	475	2	0	0	0	0	0	0	0	0
15546	43.30	26.44	475	1	0	0	0	0	0	0	0	0
15546	43.51	26.75	475	2	0	0	0	0	0	0	0	0
15549	43.52	26.53	347	4	24	24	24	24	24	13	1	24
15549	43.57	26.50	347	8	11	11	11	11	11	11	1	11
15550	44.12	27.27	16	8	26	26	26	26	26	18	1	26
15550	44.11	27.26	16	2	0	0	0	0	0	0	0	0
15550	44.07	27.16	16	2	0	0	0	0	0	0	0	0
15550	44.12	27.85	16	4	12	12	12	12	12	1	0	12
15552	43.20	27.92	41	8	85	85	85	85	85	50	0	85
15552	43.20	28.00	41	4	0	0	0	0	0	0	0	0
15552	43.20	27.91	41	2	0	0	0	0	0	0	0	0
15552	43.11	27.55	41	2	0	0	0	0	0	0	0	0
15552	43.20	27.95	43	8	11	11	11	11	11	11	0	11
15561	43.53	28.53	27	8	35	35	35	35	35	20	0	35
15561	43.32	28.32	27	2	0	0	0	0	0	0	0	0
15562	43.37	28.47	63	4	37	37	37	37	37	20	0	37
15562	43.36	28.46	63	4	0	0	0	0	0	0	0	0
15562	43.22	28.27	63	2	0	0	0	0	0	0	0	0
15600	42.83	23.67	1687	8	0	7	7	7	7	7	2	7
15601	42.27	22.77	521	4	37	37	37	37	37	19	0	37
15605	42.93	22.93	714	8	33	34	34	33	33	19	2	33
15613	42.57	23.28	2295	2	1	1	1	1	1	0	0	1
15613	42.58	23.27	2292	8	0	7	7	7	7	7	3	7
15614	42.82	23.38	588	8	45	45	45	45	45	9	0	45
15614	42.82	23.40	595	4	0	0	0	0	0	0	0	0
15614	42.81	23.38	588	4	1	1	1	1	1	0	0	1
15614	42.65	23.38	595	8	52	52	52	52	52	52	3	52
15615	42.17	23.58	2925	2	12	12	12	12	12	0	0	12
15615	42.17	23.60	2927	2	0	0	0	0	0	0	0	0
15615	42.18	23.58	2927	8	0	7	7	7	7	7	0	7
15622	42.43	23.82	637	2	0	0	0	0	0	0	0	0
15625	42.13	24.80	160	2	0	0	0	0	0	0	0	0
15625	42.13	24.75	162	8	41	41	41	41	41	38	0	41
15625	42.10	24.80	185	2	0	0	0	0	0	0	0	0
15626	42.07	24.85	156	8	11	11	11	11	11	11	0	11
15627	42.72	24.92	2382	8	12	13	13	13	13	0	0	13
15627	42.72	25.00	2378	2	0	0	0	0	0	0	0	0
15627	42.67	24.83	2389	8	0	7	7	7	7	7	3	7
15628	42.20	24.63	215	2	2	2	2	2	2	1	0	2
15628	42.22	24.33	214	8	33	33	33	33	33	19	0	33
15635	42.20	25.33	179	4	30	30	30	30	30	15	0	30
15635	42.11	25.19	179	4	0	0	0	0	0	0	0	0
15640	42.68	26.27	226	8	47	47	47	47	47	9	0	47
15640	42.68	26.30	222	4	0	0	0	0	0	0	0	0
15640	42.68	26.26	222	4	0	0	0	0	0	0	0	0
15640	42.41	26.16	222	4	0	0	0	0	0	0	0	0
15640	42.67	26.32	226	8	43	43	43	43	43	42	0	43
15640	42.67	26.33	257	8	8	8	8	8	8	8	0	8
15642	42.18	26.57	114	8	27	27	27	27	27	19	0	27
15642	42.18	26.56	114	2	0	0	0	0	0	0	0	0
15642	42.11	26.33	114	2	0	0	0	0	0	0	0	0
15642	42.57	26.57	114	2	2	2	2	2	2	0	0	2
15642	42.85	26.57	139	4	8	8	8	8	8	0	0	8
15646	42.65	26.98	195	2	0	0	0	0	0	0	0	0
15655	42.48	27.48	28	8	77	77	77	77	77	50	0	77
15655	42.48	27.50	24	4	0	0	0	0	0	0	0	0
15655	42.28	27.28	24	4	0	0	0	0	0	0	0	0
15655	42.50	27.48	28	8	11	11	11	11	11	11	0	11
15661	42.10	27.93	18	2	1	1	1	1	1	0	0	1
15661	42.05	27.55	18	2	0	0	0	0	0	0	0	0
15661	42.10	27.85	18	8	28	28	28	28	28	19	0	28
15662	42.28	27.75	10	2	0	0	0	0	0	0	0	0
15712	41.57	23.28	191	8	48	48	48	48	48	8	0	48
15712	41.57	23.30	191	4	0	0	0	0	0	0	0	0
15712	41.52	23.27	207	8	40	40	40	40	40	38	0	40
15712	41.55	23.27	207	8	11	11	11	11	11	11	0	11
15725	41.62	24.68	1180	8	0	6	6	6	6	0	0	6
15725	41.67	24.68	1930	2	0	0	0	0	0	0	0	0
15726	41.88	24.73	1750	8	0	7	7	7	7	7	2	7
15730	41.63	25.40	241	8	40	40	40	40	40	9	0	40
15730	41.38	25.24	243	4	0	0	0	0	0	0	0	0
15730	41.65	25.37	331	8	41	41	41	41	41	39	1	41
15730	41.65	25.38	331	8	11	11	11	11	11	11	0	11
15741	41.77	26.20	42	4	37	37	37	37	36	5	0	36
15741	41.76	26.20	43	2	0	0	0	0	0	0	0	0
15741	41.46	26.11	43	4	0	0	0	0	0	0	0	0
16084	44.92	9.73	140	8	61	61	61	61	61	33	0	61
16112	44.98	6.85	2680	2	0	0	0	0	0	0	0	0
16114	44.38	7.82	560	6	0	25	25	25	25	7	0	25
16115	44.27	7.78	1742	2	0	0	0	0	0	0	0	0
16115	44.25	7.80	1742	2	0	0	0	0	0	0	0	0
16116	44.80	8.10	300	4	12	12	12	12	12	0	0	12
16117	44.55	7.62	384	4	6	6	6	6	6	0	0	6
16117	44.53	7.62	386	1	0	0	0	0	0	0	0	0
16118	44.28	8.78	187	4	0	0	0	0	0	0	0	0
16118	44.78	8.78	188	2	0	0	0	0	0	0	0	0
16118	44.77	8.78	189	24	18	19	19	19	0	19	0	0
16119	44.63	8.93	468	4	14	14	14	14	14	0	0	14
16120	44.42	8.85	3	8	75	75	75	75	75	52	0	75
16120	44.42	8.90	2	4	0	0	0	0	0	0	0	0
16121	44.42	8.83	4	1	0	0	0	0	0	0	0	0
16121	44.40	8.90	45	2	0	0	0	0	0	0	0	0
16122	44.05	8.13	45	2	0	0	0	0	0	0	0	0
16122	44.05	8.12	45	4	20	20	20	20	20	0	0	20
16123	44.30	9.33	30	2	0	0	0	0	0	0	0	0
16124	44.47	9.93	1039	4	0	8	8	8	8	0	0	8
16124	44.43	9.93	1040	4	0	7	7	7	7	0	0	7
16125	44.08	9.98	10	2	8	8	8	8	8	0	0	8
16126	44.55	8.93	488	1	0	0	0	0	0	0	0	0
16129	44.03	9.83	190	8	9	7	7	9	0	9	0	0
16130	44.82	10.28	55	8	21	21	21	21	21	0	0	21
16130	44.82	10.30	50	4	0	0	0	0	0	0	0	0
16132	44.53	11.28	52	2	0	0	0	0	0	0	0	0
16134	44.20	10.70	2173	2	3	20	20	20	20	5	2	20
16134	44.18	10.70	2173	8	0	0	0	0	0	0	0	0
16136	44.03	11.00	1313	2	0	0	0	0	0	0	0	0
16136	44.02	11.00	1314	1	0	0	0	0	0	0	0	0
16138	44.83	11.62	10	4	29	31	31	29	14	18	0	14
16138	44.82	11.62	8	6	3	3	3	3	3	0	0	3
16138	44.82	11.30	8	2	0	0	0	0	0	0	0	0
16140	44.53	11.30	43	6	59	59	59	59	59	0	0	59
16142	44.05	11.38	882	2	0	0	0	0	0	0	0	0
16144	44.31	11.61	10	1	0	0	0	0	0	0	0	0
16144	44.65	11.62	38	2	0	0	0	0	0	0	0	0
16146	44.47	12.28	18	4	38	38	38	38	38	0	0	38
16146	44.47	12.30	2	4	0	0	0	0	0	0	0	0
16146	44.45	12.30	6	6	38	38	38	38	38	0	0	38
16147	44.20	12.07	29	2	0	0	0	0	0	0	0	0
16148	44.23	12.32	5	2	0	0	0	0	0	0	0	0
16148	44.22	12.30	10	8	21	21	21	21	21	20	0	21
16149	44.02	12.63	12	2	2	3	3	3	3	0	0	3
16149	44.03	12.62	13	8	61	61	61	61	61	61	0	61
16150	43.87	8.03	60	1	0	0	0	0	0	0	0	0
16153	43.95	8.17	221	8	73	73	73	73	73	46	0	73
16153	43.95	8.20	220	4	0	0	0	0	0	0	0	0
16153	43.95	8.16	221	4	1	1	1	1	1	0	0	1
16153	43.95	8.18	221	24	11	11	11	11	11	11	0	11
16154	43.43	9.90	255	2	0	0	0	0	0	0	0	0
16154	43.88	8.03	54	1	0	0	0	0	0	0	0	0
16158	43.67	10.38	1	2	6	6	6	6	6	1	0	6
16158	43.68	10.40	2	2	0	0	0	0	0	0	0	0
16158	43.68	10.38	2	8	60	60	60	60	60	59	0	60
16158	43.66	10.38	1	4	1	1	1	1	1	0	0	1
16164	43.40	10.87	555	2	0	0	0	0	0	0	0	0
16168	42.38	11.17	631	4	0	9	9	9	9	9	0	9
16170	43.80	11.20	48	8	88	88	88	88	88	29	0	88
16171	43.78	11.22	18	2	0	0	0	0	0	0	0	0
16172	43.47	11.85	248	8	21	21	21	21	21	18	0	21
16174	43.32	11.32	349	2	0	0	0	0	0	0	0	0
16176	43.88	12.52	461	2	0	0	0	0	0	0	0	0
16179	43.52	12.73	570	4	0	7	7	7	7	2	0	7
16180	43.12	12.38	511	6	0	3	3	3	3	0	0	3
16181	43.08	12.50	213	8	59	59	59	59	59	30	0	59
16190	43.62	13.52	105	8	26	26	26	26	26	0	0	26
16190	43.62	13.60	103	4	0	0	0	0	0	0	0	0
16191	43.62	13.37	12	4	60	60	60	60	59	29	0	59
16191	43.61	13.36	10	4	1	1	1	1	1	0	0	1
16192	43.43	13.58	197	1	0	0	0	0	0	0	0	0
16194	43.30	13.45	320	2	0	0	0	0	0	0	0	0
16197	42.73	10.40	396	4	12	12	12	12	12	0	0	12
16200	42.58	10.10	27	4	3	3	3	3	3	0	0	3
16204	42.90	11.77	896	2	0	1	1	1	1	0	0	1
16206	42.75	11.07	7	8	77	77	77	77	77	46	0	77
16206	42.75	11.10	5	4	0	0	0	0	0	0	0	0
16206	42.73	11.05	7	24	11	11	11	11	11	11	0	11
16210	42.00	12.02	13	1	0	0	0	0	0	0	0	0
16214	42.03	11.83	3	2	1	1	1	1	1	0	0	1
16214	42.02	11.82	4	4	9	9	9	9	9	0	0	9
16216	42.43	12.07	303	2	0	0	0	0	0	0	0	0
16216	42.43	12.08	300	2	0	0	0	0	0	0	0	0
16216	42.43	12.05	308	4	12	12	12	12	12	0	0	12
16219	42.47	12.98	1875	8	9	17	17	17	17	5	2	17
16219	42.47	13.00	1874	2	0	0	0	0	0	0	0	0
16221	42.42	12.85	389	2	0	0	0	0	0	0	0	0
16224	42.08	12.22	262	24	16	16	16	16	16	14	0	16
16225	42.98	13.87	1	2	0	0	0	0	0	0	0	0
16227	41.88	13.58	690	24	24	24	24	24	0	24	0	0
16228	42.45	13.55	2126	2	0	0	0	0	0	0	0	0
16228	42.37	13.30	671	2	0	0	0	0	0	0	0	0
16230	42.43	14.20	16	8	85	84	84	84	84	46	0	84
16231	42.42	14.20	180	1	0	0	0	0	0	0	0	0
16232	42.00	15.00	16	8	19	19	19	19	19	18	0	19
16234	42.00	12.73	89	4	10	10	10	10	10	0	0	10
16235	41.95	12.50	18	2	6	6	6	6	6	0	0	6
16238	41.87	12.57	53	1	0	0	0	0	0	0	0	0
16239	41.80	12.58	129	8	13	13	13	13	13	8	0	13
16239	41.80	12.55	101	2	0	0	0	0	0	0	0	0
16239	41.78	12.58	105	4	10	10	10	10	10	10	0	10
16240	41.82	12.47	45	4	7	7	7	7	7	0	0	7
16242	41.80	12.23	3	8	64	60	60	64	64	53	0	64
16242	41.80	12.30	2	2	0	0	0	0	0	0	0	0
16243	41.55	12.90	26	4	19	19	19	19	19	4	0	19
16244	41.65	13.30	179	2	0	0	0	0	0	0	0	0
16244	41.63	13.30	181	4	12	12	12	12	12	0	0	12
16245	41.65	12.43	6	2	0	0	0	0	0	0	0	0
16245	41.63	12.43	35	2	0	0	0	0	0	0	0	0
16245	41.65	12.45	21	8	21	21	21	21	21	20	0	21
16247	41.90	12.47	1	1	0	0	0	0	0	0	0	0
16249	41.25	13.12	3	2	0	0	0	0	0	0	0	0
16252	41.57	14.65	807	8	4	14	14	14	14	5	0	14
16253	41.07	14.08	8	2	0	0	0	0	0	0	0	0
16253	41.05	14.07	10	8	21	21	21	21	21	20	0	21
16258	41.70	15.95	838	2	0	6	6	6	6	6	0	6
16261	41.53	15.72	54	8	86	86	86	86	86	53	0	86
16261	41.53	15.80	55	4	0	0	0	0	0	0	0	0
16261	41.53	15.71	60	4	1	1	1	1	1	0	0	1
16263	41.05	15.23	1089	8	0	4	4	4	4	3	0	4
16264	41.13	15.52	514	2	0	0	0	0	0	0	0	0
16266	41.88	16.18	50	2	0	0	0	0	0	0	0	0
16270	41.13	16.78	49	8	84	84	84	84	84	60	0	84
16271	41.12	16.88	11	1	0	0	0	0	0	0	0	0
16280	40.92	12.95	185	8	87	87	87	87	87	51	0	87
16280	40.92	13.00	184	4	0	0	0	0	0	0	0	0
16289	40.85	14.30	72	8	82	82	82	82	81	53	0	81
16289	40.88	14.30	72	2	0	0	0	0	0	0	0	0
16294	40.55	14.25	264	2	0	0	0	0	0	0	0	0
16294	40.55	14.20	161	8	17	17	17	17	17	15	0	17
16300	40.63	15.80	843	4	5	9	9	9	9	0	0	9
16300	40.67	15.97	845	4	0	0	0	0	0	0	0	0
16310	40.02	15.28	185	8	76	77	77	76	77	27	0	76
16310	40.02	15.30	184	2	0	0	0	0	0	0	0	0
16310	40.01	15.28	185	4	1	1	1	1	1	0	0	1
16310	40.02	15.27	185	24	11	11	11	11	11	11	0	11
16312	40.77	16.93	347	8	21	21	21	21	21	20	0	21
16316	40.08	16.02	896	2	0	1	1	1	1	0	0	1
16318	40.70	17.33	447	2	0	0	0	0	0	0	0	0
16320	40.65	17.95	10	8	75	75	75	75	75	55	0	75
16320	40.65	18.00	15	4	0	0	0	0	0	0	0	0
16324	40.52	17.40	64	2	0	0	0	0	0	0	0	0
16325	40.43	16.88	12	8	85	85	85	85	85	57	0	85
16332	40.23	18.15	61	2	1	1	1	1	1	0	0	1
16332	40.23	18.13	53	4	11	11	11	11	11	0	0	11
16334	40.12	18.50	89	2	0	0	0	0	0	0	0	0
16334	40.10	18.48	80	1	0	0	0	0	0	0	0	0
16337	39.58	15.88	485	8	32	32	32	32	32	0	0	32
16337	39.58	15.90	484	4	0	0	0	0	0	0	0	0
16338	39.57	16.80	179	2	0	0	0	0	0	0	0	0
16344	39.33	16.40	1710	8	0	4	4	4	4	3	1	4
16350	39.00	17.07	158	8	60	60	60	60	60	33	0	60
16350	39.00	17.06	161	2	0	0	0	0	0	0	0	0
16351	39.00	17.08	155	2	0	0	0	0	0	0	0	0
16360	39.82	18.35	105	8	84	84	84	84	84	58	0	84
16362	38.90	16.25	15	8	61	61	61	61	61	57	0	61
16364	38.88	16.48	362	2	0	0	0	0	0	0	0	0
16368	38.63	16.05	520	2	0	0	0	0	0	0	0	0
16400	38.70	13.18	251	8	86	84	84	85	85	29	0	85
16400	38.70	13.20	250	4	0	0	0	0	0	0	0	0
16405	38.18	13.10	21	8	65	65	65	65	65	56	0	65
16410	38.12	13.32	105	2	0	0	0	0	0	0	0	0
16410	38.10	13.30	117	4	32	33	33	32	33	6	0	32
16415	38.58	14.87	46	24	10	10	10	10	0	10	0	0
16415	38.57	14.85	46	1	0	0	0	0	0	0	0	0
16416	38.80	15.25	4	2	0	0	0	0	0	0	0	0
16416	38.80	15.23	5	1	0	0	0	0	0	0	0	0
16420	38.20	15.55	51	8	64	65	65	65	65	57	0	65
16420	38.20	15.60	59	2	0	0	0	0	0	0	0	0
16422	38.07	15.65	22	2	10	10	10	10	10	0	0	10
16429	37.92	12.50	14	8	84	84	84	84	84	58	0	84
16429	37.91	12.50	14	4	1	1	1	1	1	0	0	1
16434	37.72	13.43	1034	2	0	2	2	2	2	0	0	2
16434	37.22	13.43	1035	2	0	0	0	0	0	0	0	0
16436	37.52	13.08	113	2	0	0	0	0	0	0	0	0
16444	38.02	14.17	35	2	0	0	0	0	0	0	0	0
16450	37.57	14.28	940	4	0	10	10	10	10	9	0	10
16453	37.08	14.22	33	4	61	61	61	61	61	32	0	61
16459	37.40	14.92	22	8	27	36	36	36	36	20	0	36
16460	37.47	15.05	17	8	84	84	84	84	84	50	0	84
16460	37.47	15.10	11	4	0	0	0	0	0	0	0	0
16464	37.07	15.28	2	1	0	0	0	0	0	0	0	0
16469	37.92	16.07	119	2	0	0	0	0	0	0	0	0
16470	36.82	11.97	170	8	87	87	87	87	87	33	0	87
16470	36.81	11.96	170	4	1	1	1	1	1	0	0	1
16480	36.68	15.13	51	8	87	87	87	87	87	57	0	87
16490	35.50	12.60	23	8	48	48	48	48	48	18	0	48
16502	41.12	8.32	118	8	8	8	8	8	8	0	0	8
16506	41.22	9.40	159	6	47	46	46	47	47	2	0	47
16520	40.63	8.28	40	8	62	61	61	62	60	54	0	60
16522	40.57	8.17	10	8	37	36	36	37	37	35	0	37
16524	40.27	8.78	559	2	0	0	0	0	0	0	0	0
16530	40.93	9.50	2	8	7	7	7	7	7	0	0	7
16531	40.87	9.50	22	8	3	3	3	3	3	0	0	3
16531	40.90	9.52	13	8	19	19	19	19	19	18	0	19
16532	40.90	9.10	556	2	0	0	0	0	0	0	0	0
16538	40.12	9.25	1022	2	0	0	0	0	0	0	0	0
16539	39.75	8.47	92	4	78	78	78	78	78	23	0	78
16539	39.75	8.50	91	2	0	0	0	0	0	0	0	0
16541	39.67	9.43	640	2	0	0	0	0	0	0	0	0
16542	39.50	9.62	21	2	0	0	0	0	0	0	0	0
16542	39.50	9.63	5	2	0	0	0	0	0	0	0	0
16544	39.37	9.30	1067	2	0	0	0	0	0	0	0	0
16546	39.35	8.97	33	8	20	23	23	23	23	18	0	23
16548	39.13	8.32	15	24	22	22	22	22	0	22	0	0
16550	39.93	9.72	156	8	74	74	74	74	74	26	0	74
16550	39.92	9.70	150	24	11	11	11	11	11	8	0	11
16560	39.25	9.05	18	8	55	55	55	55	55	26	0	55
16560	39.25	9.07	3	8	25	25	25	25	25	24	0	25
16560	39.23	9.05	5	8	11	11	11	11	11	11	0	11
16564	39.10	9.52	116	4	33	33	33	33	33	10	0	33
16570	38.77	8.85	52	1	0	0	0	0	0	0	0	0
16597	35.85	14.48	80	8	100	100	100	100	100	61	0	100
16600	41.65	26.52	48	2	0	0	0	0	0	0	0	0
16600	41.82	26.52	48	2	0	0	0	0	0	0	0	0
16600	41.52	26.52	50	1	0	0	0	0	0	0	0	0
16606	41.07	23.52	35	2	0	0	0	0	0	0	0	0
16606	41.07	23.57	35	4	0	0	0	0	0	0	0	0
16610	41.12	25.40	31	2	2	2	2	2	2	0	0	2
16613	40.80	21.42	662	2	20	21	21	20	20	0	0	20
16613	40.80	21.45	650	8	3	3	3	3	3	0	0	3
16613	40.78	21.40	662	8	2	2	2	2	2	1	0	2
16614	40.45	21.28	604	8	59	59	59	59	59	21	0	59
16618	40.80	22.05	300	2	0	0	0	0	0	0	0	0
16620	40.55	23.02	61	2	0	0	0	0	0	0	0	0
16622	40.52	22.97	4	8	88	88	88	87	87	61	0	87
16622	40.52	23.00	8	4	0	0	0	0	0	0	0	0
16622	40.51	22.96	4	4	1	1	1	1	1	0	0	1
16624	40.92	24.62	-9999	2	0	0	0	0	0	0	0	0
16624	40.98	24.60	5	8	0	0	0	0	0	0	0	0
16625	40.93	24.42	62	2	0	0	0	0	0	0	0	0
16625	40.93	24.38	62	2	0	0	0	0	0	0	0	0
16625	40.93	24.45	60	2	0	0	0	0	0	0	0	0
16627	40.85	25.88	4	8	21	22	22	21	21	0	0	21
16627	40.85	26.00	3	4	0	0	0	0	0	0	0	0
16627	40.85	25.92	3	8	67	67	67	67	67	57	0	67
16627	40.85	25.91	3	2	0	0	0	0	0	0	0	0
16628	40.05	20.75	544	2	0	0	0	0	0	0	0	0
16632	40.33	21.80	673	2	1	1	1	1	1	0	0	1
16632	40.30	21.78	627	4	0	0	0	0	0	0	0	0
16641	39.62	19.92	2	8	78	78	78	77	77	60	3	77
16641	39.62	20.00	2	4	0	0	0	0	0	0	0	0
16641	39.61	19.91	2	2	0	0	0	0	0	0	0	0
16642	39.67	20.77	484	2	10	10	10	9	9	0	0	9
16642	39.67	20.85	483	2	0	0	0	0	0	0	0	0
16642	39.70	20.82	483	8	0	0	0	0	0	0	0	0
16643	38.95	20.77	4	8	13	13	13	13	13	0	0	13
16643	38.62	20.77	4	8	61	60	60	61	61	57	4	61
16645	39.55	21.77	154	2	0	0	0	0	0	0	0	0
16648	39.63	22.42	72	8	73	73	73	73	73	60	3	73
16648	39.63	22.50	73	2	0	0	0	0	0	0	0	0
16648	39.63	22.45	73	2	0	0	0	0	0	0	0	0
16650	39.93	25.25	9	2	0	0	0	0	0	0	0	0
16650	39.92	25.23	5	8	65	65	65	65	65	53	1	65
16650	39.91	25.23	5	4	0	0	0	0	0	0	0	0
16651	39.88	25.07	4	2	18	18	18	17	17	0	0	17
16651	39.92	25.30	12	4	0	0	0	0	0	0	0	0
16651	39.92	25.25	12	8	1	1	1	1	1	0	0	1
16654	39.17	21.00	11	2	0	0	0	0	0	0	0	0
16656	39.17	21.03	29	2	0	0	0	0	0	0	0	0
16661	39.37	22.95	7	2	0	0	0	0	0	0	0	0
16662	39.12	23.73	17	2	0	0	0	0	0	0	0	0
16664	39.38	23.08	1550	2	0	0	0	0	0	0	0	0
16665	39.22	22.80	15	8	9	9	9	9	9	0	0	9
16667	39.07	26.55	5	8	21	21	21	21	21	0	0	21
16667	39.07	26.60	3	8	61	61	61	61	61	48	0	61
16667	39.07	26.58	3	2	6	6	6	6	6	0	0	6
16667	39.06	26.58	5	2	0	0	0	0	0	0	0	0
16669	38.83	20.72	7	2	2	2	2	2	2	0	0	2
16672	38.62	21.42	47	2	0	0	0	0	0	0	0	0
16672	38.62	21.38	47	2	0	0	0	0	0	0	0	0
16672	38.62	21.45	47	1	0	0	0	0	0	0	0	0
16672	38.60	21.35	24	4	0	0	0	0	0	0	0	0
16674	38.38	23.13	110	2	0	0	0	0	0	0	0	0
16674	38.38	23.10	110	2	0	0	0	0	0	0	0	0
16675	38.90	22.43	105	8	12	12	12	12	12	0	0	12
16675	38.90	22.40	144	8	64	64	64	64	64	23	0	64
16682	37.92	21.45	12	6	14	15	15	14	14	0	0	14
16682	37.92	21.50	11	2	0	0	0	0	0	0	0	0
16682	37.92	21.28	12	8	63	63	63	63	63	60	3	63
16683	38.63	24.10	218	4	9	9	9	9	9	0	0	9
16684	38.90	24.55	5	8	47	47	47	47	47	24	0	47
[truncated: 2,313 more rows]

## Sheet: MARS-45N-29N.040E-010W
1415	38.88	5.63	14	8	1	1	1	1	1	1	0	1
7500	44.63	-1.25	9	4	35	35	35	35	35	15	0	35
7500	44.63	-1.92	10	2	0	0	0	0	0	0	0	0
7502	44.53	-1.13	25	8	49	48	48	49	49	45	7	49
7502	44.53	-1.10	25	2	0	0	0	0	0	0	0	0
7503	44.37	-1.13	31	2	0	0	0	0	0	0	0	0
7503	44.43	-1.25	3	4	32	31	31	32	32	21	0	32
7510	44.83	-0.70	49	8	68	68	68	68	68	46	4	68
7510	44.83	-0.68	61	24	15	15	15	15	15	15	0	15
7517	44.18	-0.28	133	4	6	6	6	6	6	0	0	6
7517	44.18	-0.27	132	2	0	0	0	0	0	0	0	0
7524	44.17	0.60	61	2	4	4	4	4	4	2	0	4
7524	44.18	0.60	60	4	58	58	58	58	58	55	0	58
7528	44.87	0.52	33	2	0	0	0	0	0	0	0	0
7528	44.83	0.52	33	8	0	6	6	6	5	6	0	5
7529	44.82	0.52	51	16	43	43	43	43	43	42	5	43
7535	44.75	1.40	259	8	86	86	86	86	85	57	1	85
7540	44.03	1.38	108	12	25	25	25	25	25	25	0	25
7549	44.88	2.42	639	4	37	37	37	37	36	25	0	36
7549	44.90	2.42	639	14	31	31	31	31	31	29	2	31
7552	44.40	2.48	580	2	2	2	2	2	2	2	0	2
7552	44.42	2.48	579	2	0	0	0	0	0	0	0	0
7554	44.53	3.45	934	2	0	0	0	0	0	0	0	0
7555	44.18	2.52	1020	2	0	0	0	0	0	0	0	0
7558	44.12	3.02	715	4	84	84	84	84	84	52	0	84
7558	44.12	3.10	715	2	0	0	0	0	0	0	0	0
7560	44.12	3.58	1567	6	1	8	8	8	8	7	0	8
7570	44.53	4.37	280	1	0	0	0	0	0	0	0	0
7577	44.58	4.73	73	4	72	72	72	72	72	56	0	72
7577	44.58	4.80	73	4	0	0	0	0	0	0	0	0
7579	44.13	4.87	60	8	13	13	13	13	13	0	0	13
7579	44.13	4.83	60	4	55	55	55	55	55	48	0	55
7579	44.13	4.85	55	12	6	6	6	6	6	6	0	6
7585	44.17	5.27	1903	4	1	1	1	1	1	0	0	1
7586	44.08	5.05	99	4	28	28	28	28	28	22	0	28
7586	44.08	5.07	105	4	8	8	8	8	8	8	0	8
7587	44.68	5.70	1037	4	8	11	11	11	11	0	0	11
7587	44.68	5.72	1061	4	0	1	1	1	0	1	0	0
7588	44.07	6.00	460	4	66	66	66	66	66	45	0	66
7588	44.07	5.98	461	12	8	8	8	8	8	8	0	8
7591	44.57	6.50	871	4	12	35	35	35	35	0	0	35
7593	44.90	6.65	1328	2	0	0	0	0	0	0	0	0
7593	44.92	6.65	1336	2	0	0	0	0	0	0	0	0
7598	44.00	7.13	331	2	0	0	0	0	0	0	0	0
7600	43.40	-1.68	25	4	18	20	20	18	18	16	0	18
7600	43.40	1.68	47	6	12	12	12	12	12	1	0	12
7602	43.47	-1.52	75	4	21	21	21	21	21	0	0	21
7602	43.47	-1.50	75	2	0	0	0	0	0	0	0	0
7602	43.47	-1.53	71	8	61	61	61	61	61	61	0	61
7603	43.68	-1.07	32	4	42	42	42	42	42	19	0	42
7603	43.68	-1.00	32	2	0	0	0	0	0	0	0	0
7603	43.70	-1.07	33	12	5	4	4	5	5	5	0	5
7607	43.92	-0.52	62	8	15	15	15	15	15	0	0	15
7607	43.92	-0.50	62	8	58	58	58	58	58	57	0	58
7610	43.38	-0.42	188	8	82	82	82	82	82	61	3	82
7610	43.38	-0.40	188	4	0	0	0	0	0	0	0	0
7621	43.18	0.00	379	6	68	68	68	68	68	58	1	68
7622	43.68	0.60	128	14	50	50	50	50	50	40	8	50
7623	43.62	0.57	173	2	0	0	0	0	0	0	0	0
7623	43.63	0.60	137	4	6	6	6	6	6	0	0	6
7624	43.92	0.85	253	1	0	0	0	0	0	0	0	0
7627	43.02	1.10	417	4	5	5	5	5	5	0	0	5
7627	43.00	1.10	417	4	61	61	61	61	61	47	5	61
7630	43.63	1.37	152	8	73	73	73	73	73	53	1	73
7630	43.63	1.40	152	4	0	0	0	0	0	0	0	0
7630	43.63	1.36	153	4	1	1	1	1	1	0	0	1
7630	43.62	1.38	158	20	8	8	8	8	8	8	0	8
7631	43.53	1.37	166	10	20	20	20	20	20	20	0	20
7632	43.91	2.11	178	4	1	1	1	1	1	1	0	1
7635	43.22	2.32	130	4	72	72	72	72	72	56	4	72
7635	43.22	2.40	130	2	0	0	0	0	0	0	0	0
7637	43.98	2.60	667	1	0	0	0	0	0	0	0	0
7639	43.21	3.15	7	1	0	0	0	0	0	0	0	0
7640	43.92	2.10	167	2	0	0	0	0	0	0	0	0
7640	43.92	2.12	178	14	41	41	41	41	41	41	0	41
7641	43.40	3.68	94	8	29	28	28	29	29	25	0	29
7641	43.40	3.70	81	4	6	6	6	6	6	6	0	6
7643	43.58	3.97	5	8	70	70	70	70	70	61	0	70
7643	43.58	4.00	5	4	0	0	0	0	0	0	0	0
7645	43.87	4.40	60	8	56	56	56	56	56	53	3	56
7645	43.85	4.40	62	8	3	3	3	3	3	3	0	3
7646	43.77	4.42	94	2	6	6	6	6	6	5	0	6
7646	43.75	4.42	94	4	36	36	36	36	36	16	0	36
7647	43.52	4.92	23	4	22	22	22	22	22	14	0	22
7647	43.52	4.93	23	8	39	39	39	39	39	25	0	39
7648	43.60	5.12	59	2	6	6	6	6	6	6	0	6
7648	43.60	5.10	60	4	30	30	30	30	30	20	0	29
7649	43.50	5.37	111	4	22	21	21	21	22	13	0	21
7650	43.45	5.22	1	8	16	16	16	16	16	16	0	16
7650	43.45	5.21	8	4	1	1	1	1	1	0	0	1
7650	43.45	5.23	36	24	45	45	45	45	45	45	27	45
7652	43.27	5.30	70	6	19	20	20	19	19	0	0	19
7653	43.33	5.05	27	8	22	22	22	22	22	19	0	22
7656	43.18	5.58	327	4	12	12	12	12	12	0	0	12
7657	44.05	5.48	837	2	0	0	0	0	0	0	0	0
7660	43.10	5.93	28	8	60	60	60	60	60	35	0	60
7660	43.10	6.00	28	4	0	0	0	0	0	0	0	0
7661	43.08	5.93	0	8	43	44	44	44	44	43	0	44
7661	43.08	5.10	9999	2	0	0	0	0	0	0	0	0
7661	43.08	6.10	-9999	2	3	3	3	3	3	0	0	3
7661	43.08	5.95	136	8	5	5	5	5	5	5	0	5
7666	42.93	3.05	45	2	0	0	0	0	0	0	0	0
7666	42.92	3.07	50	4	12	12	12	12	12	12	0	12
7667	43.10	6.15	3	4	61	61	61	61	61	39	0	61
7668	43.10	6.36	175	2	0	2	2	0	0	0	0	0
7670	43.00	6.23	145	2	29	26	26	32	32	11	0	32
7672	43.61	6.21	500	2	0	0	0	0	0	0	0	0
7675	43.38	6.38	80	4	46	46	46	46	46	29	0	46
7677	43.20	6.68	106	4	11	11	11	11	11	0	0	11
7678	43.03	6.47	131	4	20	20	20	20	20	5	0	20
7680	43.42	6.75	2	4	25	25	25	25	25	9	0	25
7681	43.41	6.85	126	1	0	2	2	0	0	0	0	0
7682	43.75	6.92	1269	2	0	0	0	0	0	0	0	0
7684	43.55	6.95	3	4	28	28	28	28	28	15	0	28
7684	43.53	6.95	8	8	0	0	0	0	0	0	0	0
7686	43.72	7.12	299	2	0	0	0	0	0	0	0	0
7688	43.57	7.13	74	4	19	19	19	19	19	0	0	19
7690	43.67	7.22	4	6	15	15	15	15	15	0	0	15
7690	43.65	7.20	4	8	67	67	67	67	67	61	0	67
7695	43.68	7.33	138	2	24	25	25	26	26	6	0	26
7720	42.93	0.15	2883	2	0	0	0	0	0	0	0	0
7738	42.50	1.98	1430	2	0	0	0	0	0	0	0	0
7738	42.48	1.98	1432	2	0	0	0	0	0	0	0	0
7740	42.45	2.00	1328	2	0	0	0	0	0	0	0	0
7742	42.60	2.41	450	2	0	0	0	0	0	0	0	0
7747	42.73	2.87	44	8	76	76	76	76	76	53	0	76
7747	42.73	2.90	44	4	0	0	0	0	0	0	0	0
7747	42.73	2.86	48	4	1	1	1	1	1	0	0	1
7747	42.73	2.88	47	14	8	8	8	8	8	8	0	8
7749	42.52	3.13	100	4	58	58	58	58	58	41	0	58
7752	41.92	8.62	40	2	0	0	0	0	0	0	0	0
7752	41.91	8.61	152	4	0	2	2	2	2	0	0	2
7753	42.63	8.91	129	6	0	0	0	0	0	0	0	0
7753	42.63	8.92	129	6	17	17	17	17	17	12	0	17
7754	42.53	8.80	64	4	48	48	48	48	48	39	0	48
7754	42.52	8.80	58	12	5	5	5	5	5	5	0	5
7754	42.52	8.78	58	14	3	3	3	3	3	3	0	3
7756	42.52	8.68	295	6	15	15	15	15	15	0	0	15
7761	41.92	8.80	5	8	61	61	61	61	61	60	0	61
7761	41.91	8.80	9	4	1	1	1	1	1	0	0	1
7765	41.92	9.40	8	4	44	43	43	44	44	36	0	44
7765	41.92	9.42	22	14	2	2	2	2	2	2	0	2
7768	41.60	9.37	62	2	12	12	12	12	12	0	0	12
7770	41.37	9.18	105	2	40	39	39	40	38	36	0	38
7770	41.37	9.17	110	8	17	17	17	17	17	17	0	17
7770	41.38	9.18	116	8	3	3	3	3	3	3	0	3
7775	42.27	9.53	77	8	4	4	4	4	4	4	0	4
7775	42.27	9.55	74	8	8	8	8	8	8	8	0	8
7780	41.50	9.10	86	4	39	40	40	40	40	26	0	40
7780	41.52	9.10	23	10	8	8	8	8	8	8	0	8
7785	43.00	9.37	108	6	52	52	52	52	52	4	0	52
7785	42.10	9.35	113	6	5	5	5	5	5	5	0	5
7785	43.00	9.35	113	6	3	3	3	3	3	3	0	3
7790	42.55	9.48	8	8	83	83	83	83	83	61	0	83
7790	42.55	9.50	8	4	0	0	0	0	0	0	0	0
7791	42.80	9.48	120	2	12	12	12	12	12	0	0	12
7795	42.23	9.18	570	2	0	0	0	0	0	0	0	0
7796	42.08	9.08	610	2	0	0	0	0	0	0	0	0
8001	43.38	-8.37	57	2	11	10	10	11	11	0	0	11
8001	43.37	-8.40	58	2	0	0	0	0	0	0	0	0
8001	43.37	-8.42	58	8	62	62	62	62	62	60	0	62
8001	43.36	-8.41	67	4	1	1	1	1	1	0	0	1
8002	43.30	-8.38	97	2	0	0	0	0	0	0	0	0
8003	43.47	-8.32	241	2	0	0	0	0	0	0	0	0
8003	43.48	-8.32	241	2	0	0	0	0	0	0	0	0
8003	43.45	-8.28	244	2	0	0	0	0	0	0	0	0
8004	43.78	-7.67	220	2	0	0	0	0	0	0	0	0
8005	43.47	-8.23	6	2	0	0	0	0	0	0	0	0
8005	43.48	-8.23	9	2	0	0	0	0	0	0	0	0
8007	43.17	-8.52	608	1	0	0	0	0	0	0	0	0
8008	43.25	-7.48	443	8	24	24	24	24	24	12	0	24
8008	43.12	-7.45	446	4	38	38	38	38	38	0	0	38
8011	43.57	-6.03	126	4	8	8	8	8	8	8	0	8
8011	43.55	-6.03	126	4	46	46	46	46	46	1	0	46
8014	43.55	-5.67	29	2	12	12	12	12	12	0	0	12
8014	43.55	-5.60	29	2	0	0	0	0	0	0	0	0
8014	43.53	-5.63	10	4	32	32	32	32	32	0	0	32
8014	43.57	-5.70	6	4	14	13	13	14	14	0	0	14
8015	43.35	-5.87	335	8	74	74	74	74	74	59	0	74
8021	43.43	-3.83	5	2	0	0	0	0	0	0	0	0
8021	43.43	-3.82	1	4	33	33	33	33	33	9	0	33
8023	43.47	-3.78	66	4	17	17	17	17	17	0	0	17
8023	43.47	-3.80	66	4	0	0	0	0	0	0	0	0
8023	43.47	-3.82	66	8	45	45	45	45	45	38	0	45
8023	43.48	-3.80	59	8	22	22	22	22	22	22	0	22
8024	43.38	-3.12	86	2	0	0	0	0	0	0	0	0
8025	43.30	-2.92	40	2	6	6	6	6	6	0	0	6
8025	43.30	-2.93	40	4	42	42	42	42	41	0	0	41
8025	43.30	-2.90	39	4	15	15	15	15	15	14	0	15
8027	43.32	-2.05	259	6	32	32	32	32	32	9	0	32
8027	43.32	-2.00	259	2	0	0	0	0	0	0	0	0
8027	43.31	-2.05	259	4	1	1	1	1	1	0	0	1
8027	43.30	-2.05	259	8	34	34	34	34	34	28	0	34
8027	43.30	-2.03	259	8	15	15	15	15	15	15	0	15
8029	43.35	-1.78	5	4	10	10	10	10	10	0	0	10
8029	43.35	-1.80	5	4	49	49	49	49	48	0	0	48
8029	43.37	-1.78	24	2	1	1	1	1	1	0	0	1
8040	42.88	-9.27	146	2	0	0	0	0	0	0	0	0
8042	42.90	-8.42	370	4	16	16	16	16	16	0	0	16
8042	42.90	-8.40	370	2	0	0	0	0	0	0	0	0
8042	42.90	-8.43	367	4	51	52	52	52	51	10	0	51
8043	42.40	-8.70	3	2	1	1	1	1	1	0	0	1
8044	42.43	-8.60	45	2	0	0	0	0	0	0	0	0
8044	42.43	-8.65	18	2	14	14	14	14	14	0	0	14
8044	42.43	-8.62	108	4	35	34	34	35	35	0	0	35
8045	42.23	-8.65	248	6	16	16	16	16	16	0	0	16
8045	42.23	-8.60	248	2	0	0	0	0	0	0	0	0
8045	42.23	-8.63	248	8	30	30	30	30	30	24	0	30
8045	42.22	-8.63	256	8	34	34	34	34	34	28	0	34
8046	42.23	-8.72	48	2	0	0	0	0	0	0	0	0
8046	42.23	-8.70	48	2	0	0	0	0	0	0	0	0
8046	42.23	-8.73	85	2	0	0	0	0	0	0	0	0
8046	42.23	-8.75	85	2	0	0	0	0	0	0	0	0
8048	42.33	-7.87	147	4	43	39	39	43	43	0	0	43
8053	42.53	-6.58	544	4	34	33	33	34	34	0	0	34
8053	42.57	-6.60	550	4	14	12	12	14	14	0	0	14
8055	42.58	-5.65	926	4	11	31	31	32	31	0	0	31
8055	42.58	-5.60	926	2	0	0	0	0	0	0	0	0
8071	42.00	-4.53	758	2	0	0	0	0	0	0	0	0
8071	42.02	-4.53	758	2	0	0	0	0	0	0	0	0
8075	42.37	-3.65	890	4	10	15	15	15	15	0	0	15
8075	42.37	-3.60	890	4	0	0	0	0	0	0	0	0
8075	42.37	-3.63	890	4	0	11	11	12	12	0	0	12
8075	42.35	-3.63	890	4	0	3	3	3	3	0	0	3
8076	42.33	-3.70	854	2	2	2	2	2	2	0	0	2
8080	42.85	-2.65	516	2	0	0	0	0	0	0	0	0
8080	42.88	-2.73	510	4	18	18	18	18	18	0	0	18
8080	42.88	-2.72	510	4	36	36	36	36	36	8	0	36
8080	42.88	-2.65	510	2	0	0	0	0	0	0	0	0
8083	42.47	-2.43	379	2	0	0	0	0	0	0	0	0
8083	42.48	-2.45	379	2	0	0	0	0	0	0	0	0
8083	42.47	-2.38	369	2	0	0	0	0	0	0	0	0
8084	42.45	-2.32	353	8	22	22	22	22	22	0	0	22
8084	42.45	-2.30	353	4	0	0	0	0	0	0	0	0
8084	42.45	-2.33	363	8	61	61	61	61	61	53	0	61
8085	42.77	-1.63	454	4	63	63	63	63	63	8	0	63
8086	42.82	-1.65	466	2	2	2	2	2	2	0	0	2
8086	42.82	-1.50	461	1	0	0	0	0	0	0	0	0
8087	42.20	-1.45	295	1	0	0	0	0	0	0	0	0
8091	42.57	-3.13	800	2	0	0	0	0	0	0	0	0
8094	42.08	-0.32	540	2	0	0	0	0	0	0	0	0
8094	42.08	-0.33	541	4	32	32	32	32	32	0	0	32
8094	42.08	-0.30	541	2	0	0	0	0	0	0	0	0
8096	42.78	-0.53	1605	2	0	0	0	0	0	0	0	0
8112	42.20	0.87	800	2	0	0	0	0	0	0	0	0
8117	42.35	1.82	1711	2	0	0	0	0	0	0	0	0
8117	42.35	1.97	1714	2	0	1	1	1	1	0	0	1
8117	42.33	1.93	1711	2	0	0	0	0	0	0	0	0
8130	41.50	-5.75	669	4	23	22	22	23	23	0	0	23
8130	41.50	-5.70	670	2	0	0	0	0	0	0	0	0
8130	41.50	-5.73	670	4	18	18	18	18	18	0	0	18
8130	41.52	-5.73	667	4	13	13	13	13	13	0	0	13
8140	41.70	-4.85	845	4	2	2	2	2	2	0	0	2
8140	41.72	-4.85	845	4	0	8	8	9	9	0	0	9
8140	41.72	-4.80	845	1	0	0	0	0	0	0	0	0
8141	41.63	-4.73	715	8	21	21	21	21	21	0	0	21
8141	41.70	-4.72	692	4	27	27	27	27	27	0	0	27
8141	41.50	-4.75	696	8	6	6	6	6	6	4	0	6
8141	41.65	-4.75	696	8	8	8	8	8	8	6	0	8
8141	41.65	-4.77	735	8	49	48	48	49	49	44	0	49
8148	41.77	-2.47	1079	4	1	23	23	24	23	0	0	23
8148	41.77	-2.40	1079	2	0	0	0	0	0	0	0	0
8157	41.12	-1.42	788	2	0	0	0	0	0	0	0	0
8157	41.12	-1.40	788	2	0	0	0	0	0	0	0	0
8159	41.67	-1.02	257	8	50	50	50	50	50	41	0	50
8160	41.73	-0.87	247	6	18	18	18	18	18	0	0	18
8160	41.65	-1.00	257	2	3	3	3	3	3	0	0	3
8160	41.66	-1.01	258	4	1	1	1	1	1	0	0	1
8160	41.67	-1.00	258	8	15	15	15	15	15	15	0	15
8161	41.65	-0.88	237	2	0	0	0	0	0	0	0	0
8161	41.65	-0.80	237	2	0	0	0	0	0	0	0	0
8161	41.63	-0.90	222	1	0	0	0	0	0	0	0	0
8171	41.62	0.63	203	4	35	34	34	35	35	0	0	34
8171	41.63	0.60	199	4	14	14	14	14	14	0	0	14
8175	41.15	1.17	76	4	51	52	52	51	52	11	0	51
8175	41.15	1.20	76	2	0	0	0	0	0	0	0	0
8175	41.15	1.12	117	2	0	0	0	0	0	0	0	0
8176	41.12	1.25	20	2	0	0	0	0	0	0	0	0
8180	41.42	2.15	95	2	2	2	2	2	2	0	0	2
8180	41.40	2.20	93	2	0	0	0	0	0	0	0	0
8180	41.40	2.15	93	2	0	0	0	0	0	0	0	0
8180	41.40	2.18	12	2	0	0	0	0	0	0	0	0
8180	41.42	2.13	176	2	0	0	0	0	0	0	0	0
8181	41.30	2.10	4	8	16	16	16	16	16	0	0	16
8181	41.28	2.10	4	2	0	0	0	0	0	0	0	0
8181	41.28	2.07	4	8	66	66	66	66	66	61	0	66
8181	41.28	2.06	6	4	1	1	1	1	1	0	0	1
8182	41.78	2.43	1707	2	0	0	0	0	0	0	0	0
8183	41.92	2.77	143	2	0	0	0	0	0	0	0	0
8183	41.98	2.83	98	2	0	0	0	0	0	0	0	0
8184	41.90	2.77	143	8	57	57	57	57	57	40	0	57
8186	41.63	2.02	1092	2	0	0	0	0	0	0	0	0
8201	40.95	-5.65	787	2	0	0	0	0	0	0	0	0
8202	40.93	-5.45	791	8	11	16	16	15	15	0	0	15
8202	40.95	-5.50	793	8	0	15	15	15	15	7	0	15
8210	40.65	-4.70	1148	4	3	20	20	20	20	0	0	20
8210	40.67	-4.52	1131	2	0	0	0	0	0	0	0	0
8213	40.88	-4.13	1001	2	3	3	3	3	3	0	0	3
8213	40.95	-4.10	1005	1	0	0	0	0	0	0	0	0
8213	40.95	-4.13	1005	2	0	0	0	0	0	0	0	0
8213	40.95	-4.12	1015	4	0	7	7	7	7	0	0	7
8215	40.78	-4.00	1894	2	0	1	1	1	1	0	0	1
8215	40.78	-4.02	1888	4	0	7	7	7	7	0	0	7
8220	40.67	-3.77	823	2	0	0	0	0	0	0	0	0
8220	40.45	-3.71	669	2	0	0	0	0	0	0	0	0
8220	40.45	-3.72	669	2	0	0	0	0	0	0	0	0
8221	40.47	-3.57	601	8	21	21	21	21	21	0	0	21
8221	40.47	-3.50	609	4	0	0	0	0	0	0	0	0
8221	40.45	-3.58	582	8	14	14	14	14	14	12	0	14
8221	40.45	-3.55	582	8	49	49	49	49	49	49	0	49
8221	40.50	-3.58	633	8	0	0	0	0	0	0	0	0
8222	40.50	-3.45	610	6	5	5	5	5	5	0	0	5
8222	40.42	-3.68	667	1	0	0	0	0	0	0	0	0
8223	40.35	-3.75	690	2	0	0	0	0	0	0	0	0
8223	40.38	-3.78	690	2	0	0	0	0	0	0	0	0
8224	40.30	-3.72	620	4	52	53	53	51	53	0	0	51
8226	40.63	-3.22	699	2	0	0	0	0	0	0	0	0
8226	40.63	-3.17	730	4	3	4	4	4	4	0	0	4
8226	40.67	-3.17	640	4	14	12	12	14	14	0	0	14
8227	40.48	-3.45	607	2	0	0	0	0	0	0	0	0
8231	40.07	-2.13	957	4	1	13	13	12	12	0	0	12
8231	40.07	-2.12	975	2	0	6	6	6	6	0	0	6
8232	40.85	-1.88	1056	2	0	0	0	0	0	0	0	0
8232	40.85	-1.80	1056	2	0	0	0	0	0	0	0	0
8233	40.90	-1.28	904	8	12	21	21	21	21	0	0	21
8233	40.87	-1.30	932	2	0	2	2	2	2	0	0	2
8233	40.86	-1.30	933	2	0	0	0	0	0	0	0	0
8233	40.93	-1.30	889	2	0	0	0	0	0	0	0	0
8235	40.35	-1.10	915	2	0	0	0	0	0	0	0	0
8235	40.33	-1.10	915	2	0	4	4	4	4	0	0	4
8235	40.35	-1.12	902	4	0	27	27	27	27	0	0	27
8238	40.82	0.50	44	4	68	69	68	69	69	0	0	69
8261	39.48	-6.37	460	4	35	35	35	35	35	1	0	35
8261	39.48	-6.30	460	4	0	0	0	0	0	0	0	0
8261	39.47	-6.33	405	8	49	49	49	49	49	40	0	49
8261	39.47	-6.37	405	2	0	0	0	0	0	0	0	0
8272	39.87	-4.03	553	4	5	5	5	5	5	0	0	5
8272	39.85	-4.03	553	4	11	11	11	12	11	0	0	11
8272	39.88	-4.05	516	4	45	45	45	45	45	0	0	45
8280	39.00	-1.85	680	8	20	20	20	20	20	0	0	20
8280	38.95	-1.87	702	4	3	3	3	3	3	0	0	3
8280	38.95	-1.85	704	8	61	61	61	61	61	58	0	61
8282	39.43	-1.75	762	2	0	0	0	0	0	0	0	0
8284	39.48	-0.48	65	8	16	16	16	16	16	0	0	16
8284	39.50	-0.40	65	2	0	0	0	0	0	0	0	0
8284	39.50	-0.47	65	8	66	66	66	66	66	61	0	66
8284	39.50	-0.46	62	4	1	1	1	1	1	0	0	1
8285	39.47	-0.38	18	2	0	0	0	0	0	0	0	0
8285	39.48	-0.30	13	2	0	0	0	0	0	0	0	0
8285	39.48	-0.38	13	2	0	0	0	0	0	0	0	0
8286	39.98	-0.03	51	2	1	1	1	1	1	0	0	1
8286	39.95	-0.07	49	4	34	34	34	34	34	0	0	34
8290	39.15	-0.43	20	2	0	0	0	0	0	0	0	0
8303	39.73	2.72	1015	2	0	0	0	0	0	0	0	0
8306	39.55	2.73	4	8	83	83	83	83	83	61	0	83
8306	39.55	2.80	4	4	0	0	0	0	0	0	0	0
8307	39.90	3.10	3	2	0	0	0	0	0	0	0	0
8314	39.88	4.27	43	8	21	21	21	21	21	0	0	21
8314	39.87	4.22	91	4	4	4	4	4	4	0	0	4
8314	39.86	4.23	82	4	1	1	1	1	1	0	0	1
8314	39.87	4.23	82	8	61	61	61	61	61	58	0	61
8314	39.88	4.25	55	2	0	0	0	0	0	0	0	0
8329	38.88	-6.97	198	2	0	0	0	0	0	0	0	0
8330	38.90	-6.97	195	2	5	5	5	5	5	0	0	5
8330	38.88	-6.82	185	4	42	42	42	42	42	0	0	42
8330	38.88	-6.83	192	8	15	15	15	15	15	12	0	15
8335	38.52	-5.12	550	4	24	24	24	24	24	0	0	24
8348	38.98	-3.93	628	8	24	24	24	24	24	0	0	24
8348	38.98	-3.90	628	4	0	0	0	0	0	0	0	0
8348	38.98	-3.92	628	8	60	60	60	60	60	41	0	60
8358	38.38	-0.52	91	2	0	0	0	0	0	0	0	0
8359	38.37	-0.50	81	2	0	0	0	0	0	0	0	0
8360	38.28	-0.50	43	4	0	0	0	0	0	0	0	0
8360	38.28	-0.55	43	8	80	80	80	80	80	61	0	80
8360	38.38	-0.57	60	2	0	0	0	0	0	0	0	0
8361	38.65	-0.27	1498	2	0	0	0	0	0	0	0	0
8362	38.52	-0.15	10	2	0	0	0	0	0	0	0	0
8365	38.83	0.10	15	2	0	0	0	0	0	0	0	0
8373	38.87	1.37	8	8	23	23	23	23	23	0	0	23
8373	38.87	1.40	8	4	0	0	0	0	0	0	0	0
8373	38.87	1.38	12	8	46	46	46	46	46	45	0	46
8373	38.88	1.38	17	8	7	7	7	7	7	7	0	7
8373	38.88	1.37	17	8	8	8	8	8	8	8	0	8
8383	37.27	-6.95	18	2	1	1	1	1	1	0	0	1
8383	37.27	-6.90	18	1	0	0	0	0	0	0	0	0
8383	37.25	-6.95	18	2	2	3	3	3	2	0	0	2
8383	37.28	-6.92	20	4	38	37	37	38	38	0	0	38
8384	37.10	-6.73	41	2	0	0	0	0	0	0	0	0
8390	37.37	-6.00	13	2	1	1	1	1	1	0	0	1
8391	37.42	-5.90	27	8	83	83	83	83	83	34	0	83
8391	37.41	-5.90	31	4	1	1	1	1	1	0	0	1
8391	37.42	-5.88	20	2	0	0	0	0	0	0	0	0
8397	37.17	-5.57	104	2	5	5	5	5	5	0	0	5
8397	37.15	-5.60	86	4	4	4	4	4	4	0	0	4
8397	37.15	-5.62	88	4	28	28	28	28	28	0	0	28
8397	37.17	-5.62	88	4	8	8	8	8	8	0	0	8
8410	37.85	-4.85	91	4	55	55	55	55	55	8	0	55
8410	37.85	-4.83	90	8	28	28	28	28	28	15	0	28
8417	37.80	-3.80	582	2	0	0	0	0	0	0	0	0
8417	37.78	-3.80	580	4	18	18	18	19	19	0	0	19
8419	37.18	-3.70	567	4	0	0	0	0	0	0	0	0
8419	37.18	-3.78	567	8	74	74	74	74	74	59	0	74
8420	37.15	-3.58	689	2	11	11	11	11	11	0	0	11
8429	37.95	-1.23	75	4	53	53	53	53	53	0	0	53
8430	37.98	-1.13	63	2	0	0	0	0	0	0	0	0
8430	37.98	-1.10	63	1	0	0	0	0	0	0	0	0
8430	37.98	-1.12	57	2	0	0	0	0	0	0	0	0
8430	38.00	-1.17	62	8	37	37	37	37	37	37	0	37
8431	37.58	-0.98	204	2	0	0	0	0	0	0	0	0
8431	37.58	-1.00	219	2	0	0	0	0	0	0	0	0
8433	37.78	-0.80	16	4	80	80	80	79	79	21	0	79
8449	36.65	-6.30	26	2	0	0	0	0	0	0	0	0
8450	36.65	-6.35	27	2	5	5	5	5	5	0	4	5
8451	36.75	-6.05	26	2	1	1	1	1	1	0	0	1
8451	36.75	-6.00	26	2	0	0	0	0	0	0	0	0
8451	36.75	-6.07	26	4	60	60	60	60	60	21	0	60
8451	36.75	-6.13	56	2	0	0	0	0	0	0	0	0
8452	36.53	-6.30	14	2	0	0	0	0	0	0	0	0
8452	36.53	-6.28	32	2	1	3	3	2	1	0	0	1
8453	36.47	-6.20	29	2	0	0	0	0	0	0	0	0
8458	36.00	-5.60	46	4	24	24	24	24	24	0	0	24
8458	36.02	-5.60	20	2	0	0	0	0	0	0	0	0
8482	36.67	-4.50	16	8	15	15	15	15	15	0	0	15
8482	36.67	-4.40	11	4	0	0	0	0	0	0	0	0
8482	36.67	-4.48	11	8	67	67	67	67	67	61	0	67
8482	36.66	-4.48	8	2	0	0	0	0	0	0	0	0
8487	36.85	-2.30	15	4	0	0	0	0	0	0	0	0
8487	36.85	-2.37	15	8	18	18	18	18	18	0	0	18
8487	36.85	-2.38	21	8	61	61	61	61	61	53	0	61
8488	36.83	-2.47	6	4	2	2	2	2	2	0	0	2
8489	36.83	-2.08	485	1	0	0	0	0	0	0	0	0
8490	35.95	-3.02	5	2	0	0	0	0	0	0	0	0
8490	35.93	-3.03	19	2	0	0	0	0	0	0	0	0
8495	36.15	-5.35	2	24	77	77	77	77	77	55	0	77
8495	36.15	-5.30	5	4	0	0	0	0	0	0	0	0
8495	36.15	-5.33	4	4	1	1	1	1	1	0	0	1
8530	39.35	-9.40	34	4	46	31	32	51	51	25	0	51
8532	38.83	-9.33	130	4	25	25	25	25	25	6	0	25
8534	38.70	-9.05	11	2	0	0	0	0	0	0	0	0
8534	38.70	-9.03	11	4	26	26	26	26	26	12	0	26
8535	38.72	-9.15	95	24	22	23	23	23	23	23	0	23
8536	38.77	-9.13	106	8	70	70	70	70	70	54	0	70
8536	38.78	-9.10	114	4	0	0	0	0	0	0	0	0
8536	38.78	-9.13	114	8	14	14	14	14	14	7	0	14
8536	38.76	-9.13	110	4	1	1	1	1	1	0	0	1
8537	38.88	-9.03	3	2	0	0	0	0	0	0	0	0
8538	36.98	-8.95	48	8	34	33	33	34	34	11	1	34
8538	36.98	-8.90	40	4	0	0	0	0	0	0	0	0
8538	37.00	-8.95	25	6	48	47	47	48	48	48	0	48
8539	39.12	-8.98	49	2	0	0	0	0	0	0	0	0
8540	39.83	-8.88	54	4	26	26	26	26	26	11	0	26
8541	37.95	-8.86	103	2	0	0	0	0	0	0	0	0
8541	37.95	-8.87	103	24	27	27	27	27	27	26	0	27
8542	37.95	-8.88	16	2	1	1	1	1	1	0	0	1
8543	41.68	-8.83	10	2	0	0	0	0	0	0	0	0
8543	41.70	-8.80	16	8	50	50	50	50	50	46	0	50
8544	40.92	-8.63	22	4	19	19	19	19	19	5	0	19
8545	41.23	-8.68	79	8	77	77	77	77	77	60	0	77
8545	41.23	-8.60	76	2	0	0	0	0	0	0	0	0
8545	41.23	-8.67	76	4	5	5	5	5	5	0	0	5
8546	41.13	-8.60	100	2	0	0	0	0	0	0	0	0
8547	40.65	-8.73	19	2	0	0	0	0	0	0	0	0
8548	40.15	-8.47	179	24	28	28	28	28	28	28	0	28
8549	40.20	-8.42	140	8	57	57	57	57	57	32	0	57
8549	40.20	-8.40	141	4	0	0	0	0	0	0	0	0
8550	39.07	-8.40	167	2	0	0	0	0	0	0	0	0
8551	41.63	-8.80	48	8	7	8	8	8	8	8	0	8
8553	39.48	-8.43	80	2	0	0	0	0	0	0	0	0
8554	37.02	-7.92	37	2	23	23	23	21	21	4	1	21
8554	37.02	-7.97	8	8	65	65	65	65	65	61	0	65
8557	38.57	-7.90	321	8	31	31	31	31	31	25	0	31
8558	38.53	-7.90	246	8	28	28	28	28	28	28	0	28
8560	40.72	-7.88	644	24	26	26	26	26	26	26	0	26
8561	38.07	-7.92	203	4	23	24	24	24	24	10	0	24
8562	38.02	-7.87	247	8	82	82	82	82	83	59	2	82
8562	38.02	-7.80	246	4	0	0	0	0	0	0	0	0
8566	41.32	-7.73	479	4	42	41	41	42	42	23	0	42
8566	41.32	-7.70	481	4	0	0	0	0	0	0	0	0
8567	41.27	-7.72	562	24	27	27	27	27	27	27	0	27
8568	40.42	-7.55	1386	2	12	21	21	21	21	7	0	21
8568	40.42	-7.50	1380	2	0	0	0	0	0	0	0	0
8570	39.83	-7.48	384	24	29	29	29	29	29	28	0	29
8571	39.28	-7.42	542	8	84	84	84	84	84	59	2	84
8571	39.28	-7.40	541	4	0	0	0	0	0	0	0	0
8575	41.82	-6.67	718	8	21	21	21	21	21	0	0	21
8575	41.82	-6.77	691	8	5	5	5	5	5	2	0	5
8575	41.81	-6.76	692	4	1	1	1	1	1	0	0	1
8575	41.80	-6.73	692	8	59	59	59	59	59	59	0	59
8616	41.72	7.47	360	24	0	0	0	0	0	0	0	0
8912	42.95	-0.83	1434	8	10	13	13	13	13	12	0	13
8920	42.82	-0.28	2180	1	0	0	0	0	0	0	0	0
8922	42.77	-0.23	1660	8	10	12	12	12	12	11	0	12
8926	42.67	0.02	2215	1	0	0	0	0	0	0	0	0
8928	42.68	0.48	1890	2	0	0	0	0	0	0	0	0
8930	42.58	0.53	1540	1	0	0	0	0	0	0	0	0
11509	40.47	14.17	159	8	0	0	0	0	0	0	0	0
13208	44.87	13.85	32	8	25	25	25	25	25	0	0	25
13209	44.90	13.92	67	8	33	33	33	33	33	27	0	33
13214	44.53	14.47	52	2	18	18	18	18	18	0	0	18
13214	44.50	14.50	53	2	0	0	0	0	0	0	0	0
13216	44.75	14.76	19	2	0	0	0	0	0	0	0	0
13216	44.75	14.77	20	12	7	7	7	7	7	0	0	7
13218	44.98	14.90	30	18	4	4	4	4	4	0	0	4
13218	45.00	14.90	28	6	12	12	12	12	12	0	0	12
13219	44.82	14.98	1597	18	0	7	7	7	7	0	0	7
13219	44.80	15.00	1597	2	0	0	0	0	0	0	0	0
13222	44.12	15.23	4	8	10	10	10	10	10	0	0	10
13222	44.13	15.22	7	18	7	7	7	7	7	0	0	7
13222	44.13	15.21	7	2	0	0	0	0	0	0	0	0
13223	44.55	15.37	565	8	25	25	25	25	25	23	0	25
13223	44.60	15.40	565	2	0	0	0	0	0	0	0	0
13224	44.08	15.35	82	4	11	11	11	11	11	0	0	11
13224	44.08	15.40	82	2	0	0	0	0	0	0	0	0
13224	44.10	15.37	84	8	23	23	23	23	23	22	0	23
13228	44.82	15.88	250	8	66	69	69	69	69	22	0	69
13228	44.82	15.90	246	4	0	0	0	0	0	0	0	0
13228	44.80	15.90	250	2	0	0	0	0	0	0	0	0
13232	44.03	16.20	243	12	5	5	5	5	5	0	0	5
13232	44.05	16.23	255	2	0	0	0	0	0	0	0	0
13234	44.38	16.40	485	2	0	0	0	0	0	0	0	0
13237	44.76	16.70	158	2	0	0	0	0	0	0	0	0
13242	44.78	17.22	156	8	79	79	79	79	79	39	0	79
13242	44.78	17.30	153	4	0	0	0	0	0	0	0	0
13242	44.80	17.20	156	2	0	0	0	0	0	0	0	0
13244	44.07	17.47	562	4	38	38	38	38	38	0	0	38
13249	44.22	17.90	348	4	23	24	24	24	24	0	0	24
13257	44.55	18.70	305	4	32	32	32	32	32	1	0	32
13261	44.55	19.23	122	8	87	87	87	87	87	56	0	86
13262	44.55	19.30	121	4	0	0	0	0	0	0	0	0
13266	44.97	19.63	81	8	6	13	13	13	13	8	0	13
13269	44.28	19.92	174	2	11	11	11	11	11	6	0	11
13269	44.38	19.92	388	8	4	4	4	4	4	4	0	4
13269	44.32	19.92	177	8	39	39	39	39	39	39	0	39
13272	44.82	20.32	101	8	7	7	7	7	7	0	0	7
13272	44.82	20.28	96	8	66	66	66	66	66	61	0	66
13272	44.81	20.28	99	4	1	1	1	1	1	0	0	1
13272	44.80	20.30	99	2	0	0	0	0	0	0	0	0
13274	44.82	20.30	101	8	15	15	15	15	15	0	0	15
13274	44.80	20.47	132	8	55	55	55	55	55	52	0	55
13275	44.78	20.53	243	2	0	0	0	0	0	0	0	0
13275	44.77	20.42	204	2	0	0	0	0	0	0	0	0
13276	44.30	20.53	696	2	0	0	0	0	0	0	0	0
13278	44.03	20.93	190	8	6	6	6	6	6	6	0	6
13279	44.37	20.97	104	2	2	2	2	2	2	0	0	2
13279	44.37	20.95	121	8	55	55	55	55	55	49	0	55
13279	44.40	21.00	122	1	0	0	0	0	0	0	0	0
13285	44.75	21.52	84	8	55	55	55	55	55	52	0	55
13285	44.77	21.52	79	2	0	0	0	0	0	0	0	0
13286	44.22	22.53	40	2	0	0	0	0	0	0	0	0
13289	44.17	21.97	820	2	0	0	0	0	0	0	0	0
13289	44.12	21.95	1039	8	0	6	6	7	7	7	0	7
13294	44.66	22.75	44	2	0	0	0	0	0	0	0	0
13295	44.23	22.55	42	8	66	66	66	66	66	56	0	66
13295	44.20	22.60	44	2	0	0	0	0	0	0	0	0
13322	43.85	15.20	35	6	7	7	7	7	7	0	0	7
13322	43.85	15.91	35	2	0	0	0	0	0	0	0	0
13329	43.73	15.90	77	2	1	1	1	1	1	0	0	1
13329	43.73	15.92	75	6	21	21	21	21	21	0	0	21
13329	43.70	15.90	75	2	0	0	0	0	0	0	0	0
13330	43.05	16.10	20	12	5	5	5	5	5	0	0	5
13332	43.53	16.30	24	8	44	44	44	44	44	29	0	44
13333	43.52	16.43	129	8	19	19	19	19	19	7	0	19
13333	43.50	16.30	21	2	0	0	0	0	0	0	0	0
13334	43.50	16.45	49	8	2	2	2	2	2	0	0	2
13334	43.50	16.40	128	2	0	0	0	0	0	0	0	0
13335	43.17	16.45	25	18	9	9	9	9	9	0	0	9
13335	43.20	16.50	25	2	0	0	0	0	0	0	0	0
13340	43.83	17.02	728	4	2	7	7	7	7	0	0	7
13340	43.80	17.00	728	2	0	0	0	0	0	0	0	0
13344	43.03	17.41	4	2	0	0	0	0	0	0	0	0
13348	43.35	17.80	99	8	47	47	47	47	47	39	0	47
13348	43.40	17.80	108	2	0	0	0	0	0	0	0	0
13349	43.33	17.82	108	2	0	0	0	0	0	0	0	0
13351	43.72	18.27	2070	8	0	7	7	7	7	7	0	7
13353	43.83	18.35	523	8	20	25	25	25	25	0	0	25
13353	43.83	18.33	503	4	3	3	3	3	3	0	0	3
13353	43.82	18.33	511	8	24	24	24	24	24	20	0	24
13354	43.87	18.43	637	8	41	41	41	41	41	36	0	41
13354	43.90	18.40	638	2	0	0	0	0	0	0	0	0
13356	43.23	18.60	1306	2	0	0	0	0	0	0	0	0
13361	43.15	19.13	1450	6	0	7	7	7	7	1	0	7
13363	43.35	19.35	784	8	17	29	29	29	29	19	0	29
13367	43.73	19.72	1029	2	0	8	8	8	8	7	0	8
13367	43.70	19.70	1029	1	0	0	0	0	0	0	0	0
13369	43.27	20.00	1039	2	0	0	0	0	0	0	0	0
13369	43.27	20.02	1015	2	0	0	0	0	0	0	0	0
13369	43.25	19.97	1244	2	0	0	0	0	0	0	0	0
13369	43.28	20.00	1039	8	0	7	7	7	7	7	0	7
13370	43.85	20.03	312	2	0	0	0	0	0	0	0	0
13370	43.83	20.03	312	4	42	42	42	42	42	41	0	42
13376	43.73	20.70	219	2	0	0	0	0	0	0	0	0
13376	43.55	20.70	217	8	2	2	2	2	2	2	0	2
13376	43.70	20.70	217	8	39	39	39	39	39	39	0	39
13377	43.73	20.68	221	8	45	45	45	45	45	15	0	45
13378	43.28	20.80	1713	8	0	7	7	7	7	7	0	7
13382	43.13	21.27	380	2	10	10	10	10	9	5	0	9
13383	43.57	21.35	166	8	44	44	44	44	44	42	0	44
13384	43.93	21.38	123	8	54	54	54	54	54	49	0	54
13388	43.33	21.90	202	8	84	84	84	84	84	56	0	84
13388	43.30	21.90	202	1	0	0	0	0	0	0	0	0
13389	43.02	21.95	220	2	0	0	0	0	0	0	0	0
13389	43.02	21.93	224	2	0	0	0	0	0	0	0	0
13389	42.98	21.95	232	8	46	46	46	46	46	42	0	46
13392	43.88	22.30	137	2	0	0	0	0	0	0	0	0
13397	43.02	22.75	446	8	49	49	49	49	49	44	0	49
13397	43.35	22.75	450	8	5	5	5	5	5	5	0	5
13432	42.40	16.26	82	2	0	0	0	0	0	0	0	0
13432	42.40	16.30	97	2	0	0	0	0	0	0	0	0
13438	42.40	16.27	82	6	7	6	6	7	5	0	0	5
13439	42.77	16.90	187	4	10	10	10	10	10	0	0	10
13451	42.57	18.27	165	8	35	35	35	35	35	28	0	35
13451	42.65	18.08	53	18	7	7	7	7	7	0	0	7
13452	42.57	18.30	161	2	0	0	0	0	0	0	0	0
13453	42.88	18.45	491	1	0	0	0	0	0	0	0	0
13455	42.47	18.52	30	2	0	0	0	0	0	0	0	0
13455	42.40	18.73	5	8	56	55	55	56	56	55	0	56
13455	42.47	18.50	42	2	4	4	4	4	4	0	0	4
13455	42.45	18.55	10	6	25	24	24	25	25	2	0	25
13457	42.73	18.73	5	2	0	0	0	0	0	0	0	0
13457	42.40	18.70	5	1	0	0	0	0	0	0	0	0
13459	42.77	18.95	649	8	50	50	50	50	50	29	0	50
13461	42.10	19.10	2	6	29	29	29	29	29	5	0	29
13462	42.37	19.25	31	8	80	80	80	80	80	52	0	80
13462	42.37	19.30	37	2	0	0	0	0	0	0	0	0
13462	42.36	19.25	33	4	0	0	0	0	0	0	0	0
13462	42.40	19.30	33	2	0	0	0	0	0	0	0	0
13463	42.43	19.28	50	8	19	19	19	19	19	12	0	19
13465	42.83	19.53	950	6	0	7	7	7	7	0	0	7
13468	42.83	19.86	670	2	0	0	0	0	0	0	0	0
13472	42.67	20.30	501	8	61	61	61	61	61	33	0	61
13473	42.70	20.30	499	1	0	0	0	0	0	0	0	0
13477	42.22	20.73	402	8	36	36	36	36	36	29	0	36
13478	42.01	20.88	1750	2	0	0	0	0	0	0	0	0
13481	42.65	21.15	573	8	34	33	33	34	34	26	0	34
13482	42.38	21.16	580	1	0	0	0	0	0	0	0	0
13483	41.98	21.47	241	8	6	6	6	6	6	0	0	6
13483	41.97	21.63	238	6	10	10	10	10	10	0	0	10
13489	42.55	21.92	434	8	57	56	56	57	57	52	0	57
13489	42.60	21.90	434	2	0	0	0	0	0	0	0	0
13492	42.20	22.33	693	8	62	62	62	62	62	4	0	62
13492	41.02	20.88	1750	4	0	3	3	3	3	0	0	3
13493	42.20	22.30	696	1	0	0	0	0	0	0	0	0
13516	43.51	18.45	1073	1	0	0	0	0	0	0	0	0
13562	41.92	19.22	100	8	71	71	71	71	71	29	0	71
13562	41.92	19.30	97	4	0	0	0	0	0	0	0	0
13562	41.90	19.20	29	2	0	0	0	0	0	0	0	0
13575	41.85	20.87	885	4	0	0	0	1	1	0	0	1
13576	41.70	20.75	1240	1	0	0	0	0	0	0	0	0
13577	41.53	20.70	1332	2	0	5	5	5	5	0	0	5
13578	41.12	20.80	760	2	0	7	7	7	7	0	0	7
13579	41.11	20.80	760	2	0	0	0	0	0	0	0	0
13579	41.10	28.82	700	8	4	4	4	4	4	4	0	4
13579	41.10	20.82	700	8	24	24	24	24	24	24	0	24
13580	40.85	21.07	910	4	0	1	1	1	1	0	0	1
13581	41.22	21.47	-9999	4	0	0	0	1	1	0	0	1
13582	41.05	21.37	588	8	56	55	55	56	56	4	0	56
13584	41.70	21.41	2540	2	0	0	0	0	0	0	0	0
13584	41.73	21.52	2540	4	0	7	7	7	7	0	0	7
13585	41.33	21.57	673	6	29	30	30	30	30	0	0	30
13586	41.95	21.70	232	4	0	0	0	0	0	0	0	0
13586	41.95	21.63	232	2	4	4	4	4	4	0	0	4
13586	41.96	21.65	239	2	0	0	0	0	0	0	0	0
13586	41.97	21.65	239	8	60	60	60	60	60	60	0	60
13586	42.00	21.70	239	2	0	0	0	0	0	0	0	0
13588	42.02	21.40	301	4	1	1	1	1	1	0	0	1
13590	41.90	21.85	856	4	0	1	1	1	1	0	0	1
13591	41.75	22.18	296	6	48	48	48	48	48	0	0	48
13591	41.80	22.20	327	1	0	0	0	0	0	0	0	0
13592	41.42	22.25	125	6	64	65	65	65	65	0	0	65
13592	41.45	22.30	125	2	0	0	0	0	0	0	0	0
13592	41.45	22.25	125	2	5	5	5	5	5	0	0	5
13592	41.40	22.30	126	2	0	0	0	0	0	0	0	0
13593	41.30	22.42	1030	4	0	0	0	1	1	0	0	1
13594	41.88	22.50	513	4	1	1	1	1	1	0	0	1
13595	41.43	22.65	-9999	4	0	1	1	1	1	0	0	1
13597	41.15	22.50	59	4	21	19	19	21	21	0	0	21
13598	41.72	22.85	828	6	0	7	7	7	7	0	0	7
13598	41.70	22.90	836	1	0	0	0	0	0	0	0	0
13600	42.10	19.53	43	2	20	21	21	21	21	15	0	21
13601	41.33	19.80	97	1	0	0	0	0	0	0	0	0
13610	42.03	20.42	354	2	5	6	6	5	5	1	0	5
13610	42.03	20.41	358	2	0	0	0	0	0	0	0	0
13611	41.30	19.45	15	4	14	15	15	14	14	8	0	14
13612	41.30	19.47	8	2	0	0	0	0	0	0	0	0
13615	41.33	19.78	89	2	22	22	22	22	22	14	0	22
13619	41.68	20.43	657	2	9	10	10	10	9	4	0	9
13622	40.47	19.48	3	2	18	22	22	22	22	16	0	22
13622	41.46	19.48	5	2	0	0	0	0	0	0	0	0
13624	40.80	19.90	32	4	20	20	20	20	20	15	0	20
13625	40.08	20.15	193	2	7	7	7	7	7	2	0	7
13629	40.60	20.77	900	4	22	22	22	22	22	16	0	22
13629	40.60	20.76	900	4	0	0	0	0	0	0	0	0
14314	44.53	14.48	53	18	5	5	5	5	5	0	0	5
14431	44.10	15.35	82	8	7	7	7	7	7	6	0	7
14441	43.05	16.03	20	12	2	2	2	2	2	0	0	2
14452	42.43	16.90	187	10	2	2	2	2	2	0	0	2
14454	43.28	17.02	49	12	7	7	7	7	7	0	0	7
14457	43.45	17.22	435	2	0	0	0	0	0	0	0	0
14462	43.03	17.42	5	12	2	2	2	2	2	0	0	2
14462	43.03	17.43	5	12	5	5	5	5	5	0	0	5
14537	44.77	16.70	158	4	4	19	19	19	19	0	0	19
14543	44.35	17.27	431	4	13	13	13	13	13	0	0	13
14554	44.88	18.43	140	4	4	20	20	20	20	0	0	20
14640	43.08	17.02	728	4	0	2	2	2	2	0	0	2
14650	43.77	18.03	972	4	0	7	7	7	7	0	0	7
15341	45.00	22.87	259	2	0	0	0	0	0	0	0	0
15341	45.00	22.85	251	2	0	0	0	0	0	0	0	0
15345	45.00	24.53	550	2	0	0	0	0	0	0	0	0
15356	45.00	27.72	20	2	0	0	0	0	0	0	0	0
15363	44.83	21.75	90	2	0	0	0	0	0	0	0	0
15364	44.93	22.00	240	2	0	0	0	0	0	0	0	0
15364	44.92	22.00	257	4	0	0	0	0	0	0	0	0
15366	44.95	23.52	177	2	0	0	0	0	0	0	0	0
15366	44.88	22.42	177	2	0	0	0	0	0	0	0	0
15369	44.92	23.73	262	2	0	0	0	0	0	0	0	0
15369	44.87	23.72	262	2	0	0	0	0	0	0	0	0
15369	44.87	23.70	265	2	0	0	0	0	0	0	0	0
15369	44.88	23.70	265	1	0	0	0	0	0	0	0	0
15373	44.87	24.87	307	2	11	11	11	11	11	3	0	11
15373	44.88	24.83	295	2	0	0	0	0	0	0	0	0
15373	44.85	24.82	315	2	0	0	0	0	0	0	0	0
15373	44.83	24.85	317	4	0	0	0	0	0	0	0	0
15375	44.93	25.43	282	8	37	37	37	37	37	34	1	37
15375	44.92	25.42	297	4	0	0	0	0	0	0	0	0
15377	44.95	26.00	178	8	47	47	47	47	47	35	1	47
15377	44.57	26.00	177	1	0	0	0	0	0	0	0	0
15377	44.95	25.98	178	4	0	0	0	0	0	0	0	0
15387	44.90	29.60	2	2	3	3	3	3	3	3	0	3
15387	44.90	29.69	1	2	0	0	0	0	0	0	0	0
15387	44.88	29.58	2	2	0	0	0	0	0	0	0	0
15388	44.73	21.62	82	2	0	0	0	0	0	0	0	0
15388	44.72	21.62	82	2	0	0	0	0	0	0	0	0
15388	44.72	21.63	84	2	0	0	0	0	0	0	0	0
15389	44.65	21.95	68	2	0	0	0	0	0	0	0	0
15395	44.67	24.27	280	2	0	0	0	0	0	0	0	0
15395	44.65	24.27	280	2	0	0	0	0	0	0	0	0
15395	44.67	24.28	282	2	0	0	0	0	0	0	0	0
15395	44.67	24.23	281	4	0	0	0	0	0	0	0	0
15402	44.72	26.65	55	2	0	0	0	0	0	0	0	0
15402	44.72	26.63	62	2	0	0	0	0	0	0	0	0
15405	44.75	27.30	51	8	42	42	42	42	42	35	1	42
15405	44.73	27.28	51	4	0	0	0	0	0	0	0	0
15406	44.68	27.93	38	2	0	0	0	0	0	0	0	0
15406	44.68	27.95	38	2	0	0	0	0	0	0	0	0
15408	44.73	28.33	212	2	0	0	0	0	0	0	0	0
15408	44.73	28.35	220	2	0	0	0	0	0	0	0	0
15409	44.77	28.88	27	6	37	37	37	37	37	35	0	37
15409	44.76	28.88	37	4	0	0	0	0	0	0	0	0
15409	44.75	28.87	38	2	0	0	0	0	0	0	0	0
15410	44.63	22.63	78	8	59	59	59	59	59	58	1	59
15410	44.63	22.70	77	2	0	0	0	0	0	0	0	0
15410	44.62	22.62	78	24	3	3	3	3	3	3	0	3
15412	44.47	23.12	309	2	0	0	0	0	0	0	0	0
15412	44.45	23.13	314	2	0	0	0	0	0	0	0	0
15412	44.47	23.10	313	2	0	0	0	0	0	0	0	0
15412	44.48	23.12	313	2	0	0	0	0	0	0	0	0
15416	44.60	24.78	209	2	0	0	0	0	0	0	0	0
15416	44.57	24.78	209	2	0	0	0	0	0	0	0	0
15416	44.55	24.78	210	4	0	0	0	0	0	0	0	0
15416	44.57	24.80	210	1	0	0	0	0	0	0	0	0
15419	44.65	25.57	159	2	0	0	0	0	0	0	0	0
15419	44.65	25.53	159	2	0	0	0	0	0	0	0	0
15419	44.65	25.58	160	2	0	0	0	0	0	0	0	0
15420	44.48	26.13	92	2	6	6	6	6	6	0	0	6
15420	44.50	26.20	94	4	0	0	0	0	0	0	0	0
15420	44.50	26.13	94	8	51	51	51	51	51	44	1	51
15420	44.30	26.08	94	2	0	0	0	0	0	0	0	0
15420	44.83	26.37	91	8	9	9	9	9	9	9	1	9
15420	44.48	26.18	91	8	7	7	7	7	7	7	0	7
15421	44.57	26.10	95	2	0	0	0	0	0	0	0	0
15421	44.55	26.10	95	2	0	0	0	0	0	0	0	0
15422	44.42	26.08	82	2	0	0	0	0	0	0	0	0
15422	44.42	26.10	83	2	0	0	0	0	0	0	0	0
15423	44.42	27.03	51	2	0	0	0	0	0	0	0	0
15423	44.45	26.97	51	2	0	0	0	0	0	0	0	0
15424	44.47	26.52	67	2	0	0	0	0	0	0	0	0
15425	44.38	26.57	52	2	0	0	0	0	0	0	0	0
15425	44.55	27.38	52	2	0	0	0	0	0	0	0	0
15425	44.55	27.40	52	1	0	0	0	0	0	0	0	0
15428	44.68	29.00	6	2	0	0	0	0	0	0	0	0
15428	44.68	28.98	3	4	0	0	0	0	0	0	0	0
15429	44.42	26.65	88	2	0	0	0	0	0	0	0	0
15434	44.38	26.70	177	2	0	0	0	0	0	0	0	0
15434	44.43	24.35	171	2	0	0	0	0	0	0	0	0
15443	44.45	26.92	40	2	0	0	0	0	0	0	0	0
15444	44.37	27.85	58	8	37	37	37	37	37	34	0	37
15444	44.36	27.85	58	2	0	0	0	0	0	0	0	0
15445	44.35	28.05	87	2	0	0	0	0	0	0	0	0
15445	44.33	28.03	88	2	0	0	0	0	0	0	0	0
15450	44.23	23.87	190	8	57	57	57	57	57	39	1	57
15450	44.23	23.90	190	4	0	0	0	0	0	0	0	0
15450	44.20	23.90	195	2	0	0	0	0	0	0	0	0
15450	44.32	23.87	195	8	19	19	19	19	19	19	0	19
15450	44.30	23.87	193	24	3	3	3	3	3	3	0	3
15455	44.28	25.50	108	2	0	0	0	0	0	0	0	0
15455	44.28	25.52	108	2	0	0	0	0	0	0	0	0
15455	44.28	25.53	109	2	0	0	0	0	0	0	0	0
15455	44.27	25.53	107	2	0	0	0	0	0	0	0	0
15460	44.20	27.35	20	8	72	72	72	72	72	48	1	72
15460	44.11	27.21	19	2	0	0	0	0	0	0	0	0
15460	44.20	27.33	20	8	13	13	13	13	13	13	0	13
15462	44.25	28.27	120	2	0	0	0	0	0	0	0	0
15462	44.25	28.28	67	2	0	0	0	0	0	0	0	0
15462	44.23	28.25	71	4	0	0	0	0	0	0	0	0
15465	44.02	23.35	58	2	0	0	0	0	0	0	0	0
15465	44.02	23.33	59	2	0	0	0	0	0	0	0	0
15465	44.02	23.32	58	4	0	0	0	0	0	0	0	0
15469	44.10	24.35	112	2	0	0	0	0	0	0	0	0
15469	44.12	24.35	107	2	0	0	0	0	0	0	0	0
15469	44.10	24.37	107	2	0	0	0	0	0	0	0	0
15470	44.12	25.00	102	8	39	39	39	39	39	37	1	39
15470	44.07	25.00	102	1	0	0	0	0	0	0	0	0
15470	44.10	24.98	103	8	19	19	19	19	19	19	1	19
15470	44.10	24.97	103	24	3	3	3	3	3	3	0	3
15475	44.05	25.77	16	2	0	0	0	0	0	0	0	0
15475	44.07	26.63	16	2	0	0	0	0	0	0	0	0
15476	44.12	26.33	4	2	0	0	0	0	0	0	0	0
15477	44.08	26.63	32	2	0	0	0	0	0	0	0	0
15477	44.52	29.57	14	2	0	0	0	0	0	0	0	0
15479	44.08	27.95	158	2	0	0	0	0	0	0	0	0
15479	44.08	27.97	159	2	0	0	0	0	0	0	0	0
15480	44.22	28.63	32	8	47	47	47	47	47	37	0	47
15480	44.22	28.70	31	4	0	0	0	0	0	0	0	0
15480	44.21	28.63	32	2	0	0	0	0	0	0	0	0
15480	44.13	28.38	17	2	0	0	0	0	0	0	0	0
15480	44.22	28.67	32	8	2	2	2	2	2	2	0	2
15480	44.22	28.65	14	8	19	19	19	19	19	19	0	19
15480	44.20	28.63	14	24	3	3	3	3	3	3	0	3
15481	44.33	28.43	97	2	0	0	0	0	0	0	0	0
15482	43.98	22.95	68	8	37	37	37	37	37	34	1	37
15489	43.98	25.35	75	2	0	0	0	0	0	0	0	0
15489	43.98	25.33	76	2	0	0	0	0	0	0	0	0
15489	43.97	25.35	76	4	0	0	0	0	0	0	0	0
15490	43.75	24.87	31	2	0	0	0	0	0	0	0	0
15490	43.77	24.87	31	8	11	11	11	11	11	8	0	11
15490	43.75	24.88	31	8	29	29	29	29	29	28	1	29
15491	43.88	25.97	17	2	0	0	0	0	0	0	0	0
15491	43.88	25.95	24	2	0	0	0	0	0	0	0	0
15494	43.77	23.95	31	2	0	0	0	0	0	0	0	0
15494	43.78	23.95	40	2	0	0	0	0	0	0	0	0
15494	43.78	23.93	37	4	0	0	0	0	0	0	0	0
15498	43.67	25.35	34	2	0	0	0	0	0	0	0	0
15498	43.65	25.35	35	4	0	0	0	0	0	0	0	0
15499	43.82	28.58	4	8	67	67	67	67	67	38	0	67
15499	43.81	28.58	6	2	0	0	0	0	0	0	0	0
15499	43.49	28.35	6	2	0	0	0	0	0	0	0	0
15499	43.80	28.58	7	4	0	0	0	0	0	0	0	0
15501	44.15	22.78	38	2	2	2	2	2	2	0	0	2
15501	44.17	22.80	38	8	21	21	21	21	21	13	1	21
15502	43.82	22.88	33	8	22	22	22	22	22	12	1	22
15502	43.98	22.85	595	8	11	11	11	11	11	11	0	11
15503	43.83	22.67	253	2	2	2	2	2	2	1	0	2
15505	43.20	23.53	348	8	35	35	35	35	35	20	2	35
15507	43.42	23.22	204	2	0	0	0	0	0	0	0	0
15511	43.82	23.23	33	8	47	47	47	47	47	7	0	47
15511	43.82	23.30	35	4	0	0	0	0	0	0	0	0
15511	43.82	23.25	33	8	51	51	51	51	51	46	2	51
15514	43.73	23.97	31	2	6	6	6	6	6	0	0	6
15514	43.68	23.97	31	8	25	25	25	25	25	16	1	25
15525	43.13	24.72	219	4	24	24	24	24	24	13	1	24
15525	43.15	24.70	221	8	11	11	11	11	11	11	0	11
15526	43.42	24.60	123	8	68	68	68	68	68	37	0	68
15526	43.40	24.60	71	8	20	20	20	20	20	20	1	20
15530	42.75	24.98	197	2	0	0	0	0	0	0	0	0
15530	43.08	25.65	217	8	35	35	35	35	35	20	1	35
15533	43.62	25.35	26	8	34	37	37	37	37	19	1	37
15533	43.61	25.35	25	4	0	0	0	0	0	0	0	0
15533	43.36	25.21	25	2	0	0	0	0	0	0	0	0
15535	43.87	25.97	46	8	38	38	38	38	38	6	0	38
15535	43.87	26.00	48	4	0	0	0	0	0	0	0	0
15535	43.87	25.95	48	8	42	42	42	42	42	32	1	42
15535	43.86	25.95	48	4	0	0	0	0	0	0	0	0
15535	43.87	25.45	46	8	3	3	3	3	3	3	0	3
15535	43.52	25.57	48	4	0	0	0	0	0	0	0	0
15535	43.85	25.95	45	8	52	52	52	52	52	46	2	52
15544	43.27	26.93	219	8	21	21	21	21	21	21	0	21
15544	43.27	27.00	220	2	0	0	0	0	0	0	0	0
15544	43.26	26.93	220	2	0	0	0	0	0	0	0	0
15544	43.16	26.55	220	4	0	0	0	0	0	0	0	0
15546	43.52	26.75	475	2	0	0	0	0	0	0	0	0
15546	43.30	26.44	475	1	0	0	0	0	0	0	0	0
15546	43.51	26.75	475	2	0	0	0	0	0	0	0	0
15549	43.52	26.53	347	4	24	24	24	24	24	13	1	24
15549	43.57	26.50	347	8	11	11	11	11	11	11	1	11
15550	44.12	27.27	16	8	26	26	26	26	26	18	1	26
15550	44.11	27.26	16	2	0	0	0	0	0	0	0	0
15550	44.07	27.16	16	2	0	0	0	0	0	0	0	0
15550	44.12	27.85	16	4	12	12	12	12	12	1	0	12
15552	43.20	27.92	41	8	85	85	85	85	85	50	0	85
15552	43.20	28.00	41	4	0	0	0	0	0	0	0	0
15552	43.20	27.91	41	2	0	0	0	0	0	0	0	0
15552	43.11	27.55	41	2	0	0	0	0	0	0	0	0
15552	43.20	27.95	43	8	11	11	11	11	11	11	0	11
15561	43.53	28.53	27	8	35	35	35	35	35	20	0	35
15561	43.32	28.32	27	2	0	0	0	0	0	0	0	0
15562	43.37	28.47	63	4	37	37	37	37	37	20	0	37
15562	43.36	28.46	63	4	0	0	0	0	0	0	0	0
15562	43.22	28.27	63	2	0	0	0	0	0	0	0	0
15600	42.83	23.67	1687	8	0	7	7	7	7	7	2	7
15601	42.27	22.77	521	4	37	37	37	37	37	19	0	37
15605	42.93	22.93	714	8	33	34	34	33	33	19	2	33
15613	42.57	23.28	2295	2	1	1	1	1	1	0	0	1
15613	42.58	23.27	2292	8	0	7	7	7	7	7	3	7
15614	42.82	23.38	588	8	45	45	45	45	45	9	0	45
15614	42.82	23.40	595	4	0	0	0	0	0	0	0	0
15614	42.81	23.38	588	4	1	1	1	1	1	0	0	1
15614	42.65	23.38	595	8	52	52	52	52	52	52	3	52
15615	42.17	23.58	2925	2	12	12	12	12	12	0	0	12
15615	42.17	23.60	2927	2	0	0	0	0	0	0	0	0
15615	42.18	23.58	2927	8	0	7	7	7	7	7	0	7
15622	42.43	23.82	637	2	0	0	0	0	0	0	0	0
15625	42.13	24.80	160	2	0	0	0	0	0	0	0	0
15625	42.13	24.75	162	8	41	41	41	41	41	38	0	41
15625	42.10	24.80	185	2	0	0	0	0	0	0	0	0
15626	42.07	24.85	156	8	11	11	11	11	11	11	0	11
15627	42.72	24.92	2382	8	12	13	13	13	13	0	0	13
15627	42.72	25.00	2378	2	0	0	0	0	0	0	0	0
15627	42.67	24.83	2389	8	0	7	7	7	7	7	3	7
15628	42.20	24.63	215	2	2	2	2	2	2	1	0	2
15628	42.22	24.33	214	8	33	33	33	33	33	19	0	33
15635	42.20	25.33	179	4	30	30	30	30	30	15	0	30
15635	42.11	25.19	179	4	0	0	0	0	0	0	0	0
15640	42.68	26.27	226	8	47	47	47	47	47	9	0	47
15640	42.68	26.30	222	4	0	0	0	0	0	0	0	0
15640	42.68	26.26	222	4	0	0	0	0	0	0	0	0
15640	42.41	26.16	222	4	0	0	0	0	0	0	0	0
15640	42.67	26.32	226	8	43	43	43	43	43	42	0	43
15640	42.67	26.33	257	8	8	8	8	8	8	8	0	8
15642	42.18	26.57	114	8	27	27	27	27	27	19	0	27
15642	42.18	26.56	114	2	0	0	0	0	0	0	0	0
15642	42.11	26.33	114	2	0	0	0	0	0	0	0	0
15642	42.57	26.57	114	2	2	2	2	2	2	0	0	2
15642	42.85	26.57	139	4	8	8	8	8	8	0	0	8
15646	42.65	26.98	195	2	0	0	0	0	0	0	0	0
15655	42.48	27.48	28	8	77	77	77	77	77	50	0	77
15655	42.48	27.50	24	4	0	0	0	0	0	0	0	0
15655	42.28	27.28	24	4	0	0	0	0	0	0	0	0
15655	42.50	27.48	28	8	11	11	11	11	11	11	0	11
15661	42.10	27.93	18	2	1	1	1	1	1	0	0	1
15661	42.05	27.55	18	2	0	0	0	0	0	0	0	0
15661	42.10	27.85	18	8	28	28	28	28	28	19	0	28
15662	42.28	27.75	10	2	0	0	0	0	0	0	0	0
15712	41.57	23.28	191	8	48	48	48	48	48	8	0	48
15712	41.57	23.30	191	4	0	0	0	0	0	0	0	0
15712	41.52	23.27	207	8	40	40	40	40	40	38	0	40
15712	41.55	23.27	207	8	11	11	11	11	11	11	0	11
15725	41.62	24.68	1180	8	0	6	6	6	6	0	0	6
15725	41.67	24.68	1930	2	0	0	0	0	0	0	0	0
15726	41.88	24.73	1750	8	0	7	7	7	7	7	2	7
15730	41.63	25.40	241	8	40	40	40	40	40	9	0	40
15730	41.38	25.24	243	4	0	0	0	0	0	0	0	0
15730	41.65	25.37	331	8	41	41	41	41	41	39	1	41
15730	41.65	25.38	331	8	11	11	11	11	11	11	0	11
15741	41.77	26.20	42	4	37	37	37	37	36	5	0	36
15741	41.76	26.20	43	2	0	0	0	0	0	0	0	0
15741	41.46	26.11	43	4	0	0	0	0	0	0	0	0
16084	44.92	9.73	140	8	61	61	61	61	61	33	0	61
16112	44.98	6.85	2680	2	0	0	0	0	0	0	0	0
16114	44.38	7.82	560	6	0	25	25	25	25	7	0	25
16115	44.27	7.78	1742	2	0	0	0	0	0	0	0	0
16115	44.25	7.80	1742	2	0	0	0	0	0	0	0	0
16116	44.80	8.10	300	4	12	12	12	12	12	0	0	12
16117	44.55	7.62	384	4	6	6	6	6	6	0	0	6
16117	44.53	7.62	386	1	0	0	0	0	0	0	0	0
16118	44.28	8.78	187	4	0	0	0	0	0	0	0	0
16118	44.78	8.78	188	2	0	0	0	0	0	0	0	0
16118	44.77	8.78	189	24	18	19	19	19	0	19	0	0
16119	44.63	8.93	468	4	14	14	14	14	14	0	0	14
16120	44.42	8.85	3	8	75	75	75	75	75	52	0	75
16120	44.42	8.90	2	4	0	0	0	0	0	0	0	0
16121	44.42	8.83	4	1	0	0	0	0	0	0	0	0
16121	44.40	8.90	45	2	0	0	0	0	0	0	0	0
16122	44.05	8.13	45	2	0	0	0	0	0	0	0	0
16122	44.05	8.12	45	4	20	20	20	20	20	0	0	20
16123	44.30	9.33	30	2	0	0	0	0	0	0	0	0
16124	44.47	9.93	1039	4	0	8	8	8	8	0	0	8
16124	44.43	9.93	1040	4	0	7	7	7	7	0	0	7
16125	44.08	9.98	10	2	8	8	8	8	8	0	0	8
16126	44.55	8.93	488	1	0	0	0	0	0	0	0	0
16129	44.03	9.83	190	8	9	7	7	9	0	9	0	0
16130	44.82	10.28	55	8	21	21	21	21	21	0	0	21
16130	44.82	10.30	50	4	0	0	0	0	0	0	0	0
16132	44.53	11.28	52	2	0	0	0	0	0	0	0	0
16134	44.20	10.70	2173	2	3	20	20	20	20	5	2	20
16134	44.18	10.70	2173	8	0	0	0	0	0	0	0	0
16136	44.03	11.00	1313	2	0	0	0	0	0	0	0	0
16136	44.02	11.00	1314	1	0	0	0	0	0	0	0	0
16138	44.83	11.62	10	4	29	31	31	29	14	18	0	14
16138	44.82	11.62	8	6	3	3	3	3	3	0	0	3
16138	44.82	11.30	8	2	0	0	0	0	0	0	0	0
16140	44.53	11.30	43	6	59	59	59	59	59	0	0	59
16142	44.05	11.38	882	2	0	0	0	0	0	0	0	0
16144	44.31	11.61	10	1	0	0	0	0	0	0	0	0
16144	44.65	11.62	38	2	0	0	0	0	0	0	0	0
16146	44.47	12.28	18	4	38	38	38	38	38	0	0	38
16146	44.47	12.30	2	4	0	0	0	0	0	0	0	0
16146	44.45	12.30	6	6	38	38	38	38	38	0	0	38
16147	44.20	12.07	29	2	0	0	0	0	0	0	0	0
16148	44.23	12.32	5	2	0	0	0	0	0	0	0	0
16148	44.22	12.30	10	8	21	21	21	21	21	20	0	21
16149	44.02	12.63	12	2	2	3	3	3	3	0	0	3
16149	44.03	12.62	13	8	61	61	61	61	61	61	0	61
16150	43.87	8.03	60	1	0	0	0	0	0	0	0	0
16153	43.95	8.17	221	8	73	73	73	73	73	46	0	73
16153	43.95	8.20	220	4	0	0	0	0	0	0	0	0
16153	43.95	8.16	221	4	1	1	1	1	1	0	0	1
16153	43.95	8.18	221	24	11	11	11	11	11	11	0	11
16154	43.43	9.90	255	2	0	0	0	0	0	0	0	0
16154	43.88	8.03	54	1	0	0	0	0	0	0	0	0
16158	43.67	10.38	1	2	6	6	6	6	6	1	0	6
16158	43.68	10.40	2	2	0	0	0	0	0	0	0	0
16158	43.68	10.38	2	8	60	60	60	60	60	59	0	60
16158	43.66	10.38	1	4	1	1	1	1	1	0	0	1
16164	43.40	10.87	555	2	0	0	0	0	0	0	0	0
16168	42.38	11.17	631	4	0	9	9	9	9	9	0	9
16170	43.80	11.20	48	8	88	88	88	88	88	29	0	88
16171	43.78	11.22	18	2	0	0	0	0	0	0	0	0
16172	43.47	11.85	248	8	21	21	21	21	21	18	0	21
16174	43.32	11.32	349	2	0	0	0	0	0	0	0	0
16176	43.88	12.52	461	2	0	0	0	0	0	0	0	0
16179	43.52	12.73	570	4	0	7	7	7	7	2	0	7
16180	43.12	12.38	511	6	0	3	3	3	3	0	0	3
16181	43.08	12.50	213	8	59	59	59	59	59	30	0	59
16190	43.62	13.52	105	8	26	26	26	26	26	0	0	26
16190	43.62	13.60	103	4	0	0	0	0	0	0	0	0
16191	43.62	13.37	12	4	60	60	60	60	59	29	0	59
16191	43.61	13.36	10	4	1	1	1	1	1	0	0	1
16192	43.43	13.58	197	1	0	0	0	0	0	0	0	0
16194	43.30	13.45	320	2	0	0	0	0	0	0	0	0
16197	42.73	10.40	396	4	12	12	12	12	12	0	0	12
16200	42.58	10.10	27	4	3	3	3	3	3	0	0	3
16204	42.90	11.77	896	2	0	1	1	1	1	0	0	1
16206	42.75	11.07	7	8	77	77	77	77	77	46	0	77
16206	42.75	11.10	5	4	0	0	0	0	0	0	0	0
16206	42.73	11.05	7	24	11	11	11	11	11	11	0	11
16210	42.00	12.02	13	1	0	0	0	0	0	0	0	0
16214	42.03	11.83	3	2	1	1	1	1	1	0	0	1
16214	42.02	11.82	4	4	9	9	9	9	9	0	0	9
16216	42.43	12.07	303	2	0	0	0	0	0	0	0	0
16216	42.43	12.08	300	2	0	0	0	0	0	0	0	0
16216	42.43	12.05	308	4	12	12	12	12	12	0	0	12
16219	42.47	12.98	1875	8	9	17	17	17	17	5	2	17
16219	42.47	13.00	1874	2	0	0	0	0	0	0	0	0
16221	42.42	12.85	389	2	0	0	0	0	0	0	0	0
16224	42.08	12.22	262	24	16	16	16	16	16	14	0	16
16225	42.98	13.87	1	2	0	0	0	0	0	0	0	0
16227	41.88	13.58	690	24	24	24	24	24	0	24	0	0
16228	42.45	13.55	2126	2	0	0	0	0	0	0	0	0
16228	42.37	13.30	671	2	0	0	0	0	0	0	0	0
16230	42.43	14.20	16	8	85	84	84	84	84	46	0	84
16231	42.42	14.20	180	1	0	0	0	0	0	0	0	0
16232	42.00	15.00	16	8	19	19	19	19	19	18	0	19
16234	42.00	12.73	89	4	10	10	10	10	10	0	0	10
16235	41.95	12.50	18	2	6	6	6	6	6	0	0	6
16238	41.87	12.57	53	1	0	0	0	0	0	0	0	0
16239	41.80	12.58	129	8	13	13	13	13	13	8	0	13
16239	41.80	12.55	101	2	0	0	0	0	0	0	0	0
16239	41.78	12.58	105	4	10	10	10	10	10	10	0	10
16240	41.82	12.47	45	4	7	7	7	7	7	0	0	7
16242	41.80	12.23	3	8	64	60	60	64	64	53	0	64
16242	41.80	12.30	2	2	0	0	0	0	0	0	0	0
16243	41.55	12.90	26	4	19	19	19	19	19	4	0	19
16244	41.65	13.30	179	2	0	0	0	0	0	0	0	0
16244	41.63	13.30	181	4	12	12	12	12	12	0	0	12
16245	41.65	12.43	6	2	0	0	0	0	0	0	0	0
16245	41.63	12.43	35	2	0	0	0	0	0	0	0	0
16245	41.65	12.45	21	8	21	21	21	21	21	20	0	21
16247	41.90	12.47	1	1	0	0	0	0	0	0	0	0
16249	41.25	13.12	3	2	0	0	0	0	0	0	0	0
16252	41.57	14.65	807	8	4	14	14	14	14	5	0	14
16253	41.07	14.08	8	2	0	0	0	0	0	0	0	0
16253	41.05	14.07	10	8	21	21	21	21	21	20	0	21
16258	41.70	15.95	838	2	0	6	6	6	6	6	0	6
16261	41.53	15.72	54	8	86	86	86	86	86	53	0	86
16261	41.53	15.80	55	4	0	0	0	0	0	0	0	0
16261	41.53	15.71	60	4	1	1	1	1	1	0	0	1
16263	41.05	15.23	1089	8	0	4	4	4	4	3	0	4
16264	41.13	15.52	514	2	0	0	0	0	0	0	0	0
16266	41.88	16.18	50	2	0	0	0	0	0	0	0	0
16270	41.13	16.78	49	8	84	84	84	84	84	60	0	84
16271	41.12	16.88	11	1	0	0	0	0	0	0	0	0
16280	40.92	12.95	185	8	87	87	87	87	87	51	0	87
16280	40.92	13.00	184	4	0	0	0	0	0	0	0	0
16289	40.85	14.30	72	8	82	82	82	82	81	53	0	81
16289	40.88	14.30	72	2	0	0	0	0	0	0	0	0
16294	40.55	14.25	264	2	0	0	0	0	0	0	0	0
16294	40.55	14.20	161	8	17	17	17	17	17	15	0	17
16300	40.63	15.80	843	4	5	9	9	9	9	0	0	9
16300	40.67	15.97	845	4	0	0	0	0	0	0	0	0
16310	40.02	15.28	185	8	76	77	77	76	77	27	0	76
16310	40.02	15.30	184	2	0	0	0	0	0	0	0	0
16310	40.01	15.28	185	4	1	1	1	1	1	0	0	1
16310	40.02	15.27	185	24	11	11	11	11	11	11	0	11
16312	40.77	16.93	347	8	21	21	21	21	21	20	0	21
16316	40.08	16.02	896	2	0	1	1	1	1	0	0	1
16318	40.70	17.33	447	2	0	0	0	0	0	0	0	0
16320	40.65	17.95	10	8	75	75	75	75	75	55	0	75
16320	40.65	18.00	15	4	0	0	0	0	0	0	0	0
16324	40.52	17.40	64	2	0	0	0	0	0	0	0	0
16325	40.43	16.88	12	8	85	85	85	85	85	57	0	85
16332	40.23	18.15	61	2	1	1	1	1	1	0	0	1
16332	40.23	18.13	53	4	11	11	11	11	11	0	0	11
16334	40.12	18.50	89	2	0	0	0	0	0	0	0	0
16334	40.10	18.48	80	1	0	0	0	0	0	0	0	0
16337	39.58	15.88	485	8	32	32	32	32	32	0	0	32
16337	39.58	15.90	484	4	0	0	0	0	0	0	0	0
16338	39.57	16.80	179	2	0	0	0	0	0	0	0	0
16344	39.33	16.40	1710	8	0	4	4	4	4	3	1	4
16350	39.00	17.07	158	8	60	60	60	60	60	33	0	60
16350	39.00	17.06	161	2	0	0	0	0	0	0	0	0
16351	39.00	17.08	155	2	0	0	0	0	0	0	0	0
16360	39.82	18.35	105	8	84	84	84	84	84	58	0	84
16362	38.90	16.25	15	8	61	61	61	61	61	57	0	61
16364	38.88	16.48	362	2	0	0	0	0	0	0	0	0
16368	38.63	16.05	520	2	0	0	0	0	0	0	0	0
16400	38.70	13.18	251	8	86	84	84	85	85	29	0	85
16400	38.70	13.20	250	4	0	0	0	0	0	0	0	0
16405	38.18	13.10	21	8	65	65	65	65	65	56	0	65
16410	38.12	13.32	105	2	0	0	0	0	0	0	0	0
16410	38.10	13.30	117	4	32	33	33	32	33	6	0	32
16415	38.58	14.87	46	24	10	10	10	10	0	10	0	0
16415	38.57	14.85	46	1	0	0	0	0	0	0	0	0
16416	38.80	15.25	4	2	0	0	0	0	0	0	0	0
16416	38.80	15.23	5	1	0	0	0	0	0	0	0	0
16420	38.20	15.55	51	8	64	65	65	65	65	57	0	65
16420	38.20	15.60	59	2	0	0	0	0	0	0	0	0
16422	38.07	15.65	22	2	10	10	10	10	10	0	0	10
16429	37.92	12.50	14	8	84	84	84	84	84	58	0	84
16429	37.91	12.50	14	4	1	1	1	1	1	0	0	1
16434	37.72	13.43	1034	2	0	2	2	2	2	0	0	2
16434	37.22	13.43	1035	2	0	0	0	0	0	0	0	0
16436	37.52	13.08	113	2	0	0	0	0	0	0	0	0
16444	38.02	14.17	35	2	0	0	0	0	0	0	0	0
16450	37.57	14.28	940	4	0	10	10	10	10	9	0	10
16453	37.08	14.22	33	4	61	61	61	61	61	32	0	61
16459	37.40	14.92	22	8	27	36	36	36	36	20	0	36
16460	37.47	15.05	17	8	84	84	84	84	84	50	0	84
16460	37.47	15.10	11	4	0	0	0	0	0	0	0	0
16464	37.07	15.28	2	1	0	0	0	0	0	0	0	0
16469	37.92	16.07	119	2	0	0	0	0	0	0	0	0
16470	36.82	11.97	170	8	87	87	87	87	87	33	0	87
16470	36.81	11.96	170	4	1	1	1	1	1	0	0	1
16480	36.68	15.13	51	8	87	87	87	87	87	57	0	87
16490	35.50	12.60	23	8	48	48	48	48	48	18	0	48
16502	41.12	8.32	118	8	8	8	8	8	8	0	0	8
16506	41.22	9.40	159	6	47	46	46	47	47	2	0	47
16520	40.63	8.28	40	8	62	61	61	62	60	54	0	60
16522	40.57	8.17	10	8	37	36	36	37	37	35	0	37
16524	40.27	8.78	559	2	0	0	0	0	0	0	0	0
16530	40.93	9.50	2	8	7	7	7	7	7	0	0	7
16531	40.87	9.50	22	8	3	3	3	3	3	0	0	3
16531	40.90	9.52	13	8	19	19	19	19	19	18	0	19
16532	40.90	9.10	556	2	0	0	0	0	0	0	0	0
16538	40.12	9.25	1022	2	0	0	0	0	0	0	0	0
16539	39.75	8.47	92	4	78	78	78	78	78	23	0	78
16539	39.75	8.50	91	2	0	0	0	0	0	0	0	0
16541	39.67	9.43	640	2	0	0	0	0	0	0	0	0
16542	39.50	9.62	21	2	0	0	0	0	0	0	0	0
16542	39.50	9.63	5	2	0	0	0	0	0	0	0	0
16544	39.37	9.30	1067	2	0	0	0	0	0	0	0	0
16546	39.35	8.97	33	8	20	23	23	23	23	18	0	23
16548	39.13	8.32	15	24	22	22	22	22	0	22	0	0
16550	39.93	9.72	156	8	74	74	74	74	74	26	0	74
16550	39.92	9.70	150	24	11	11	11	11	11	8	0	11
16560	39.25	9.05	18	8	55	55	55	55	55	26	0	55
16560	39.25	9.07	3	8	25	25	25	25	25	24	0	25
16560	39.23	9.05	5	8	11	11	11	11	11	11	0	11
16564	39.10	9.52	116	4	33	33	33	33	33	10	0	33
16570	38.77	8.85	52	1	0	0	0	0	0	0	0	0
16597	35.85	14.48	80	8	100	100	100	100	100	61	0	100
16600	41.65	26.52	48	2	0	0	0	0	0	0	0	0
16600	41.82	26.52	48	2	0	0	0	0	0	0	0	0
16600	41.52	26.52	50	1	0	0	0	0	0	0	0	0
16606	41.07	23.52	35	2	0	0	0	0	0	0	0	0
16606	41.07	23.57	35	4	0	0	0	0	0	0	0	0
16610	41.12	25.40	31	2	2	2	2	2	2	0	0	2
16613	40.80	21.42	662	2	20	21	21	20	20	0	0	20
16613	40.80	21.45	650	8	3	3	3	3	3	0	0	3
16613	40.78	21.40	662	8	2	2	2	2	2	1	0	2
16614	40.45	21.28	604	8	59	59	59	59	59	21	0	59
16618	40.80	22.05	300	2	0	0	0	0	0	0	0	0
16620	40.55	23.02	61	2	0	0	0	0	0	0	0	0
16622	40.52	22.97	4	8	88	88	88	87	87	61	0	87
16622	40.52	23.00	8	4	0	0	0	0	0	0	0	0
16622	40.51	22.96	4	4	1	1	1	1	1	0	0	1
16624	40.92	24.62	-9999	2	0	0	0	0	0	0	0	0
16624	40.98	24.60	5	8	0	0	0	0	0	0	0	0
16625	40.93	24.42	62	2	0	0	0	0	0	0	0	0
16625	40.93	24.38	62	2	0	0	0	0	0	0	0	0
16625	40.93	24.45	60	2	0	0	0	0	0	0	0	0
16627	40.85	25.88	4	8	21	22	22	21	21	0	0	21
16627	40.85	26.00	3	4	0	0	0	0	0	0	0	0
16627	40.85	25.92	3	8	67	67	67	67	67	57	0	67
16627	40.85	25.91	3	2	0	0	0	0	0	0	0	0
16628	40.05	20.75	544	2	0	0	0	0	0	0	0	0
16632	40.33	21.80	673	2	1	1	1	1	1	0	0	1
16632	40.30	21.78	627	4	0	0	0	0	0	0	0	0
16641	39.62	19.92	2	8	78	78	78	77	77	60	3	77
16641	39.62	20.00	2	4	0	0	0	0	0	0	0	0
16641	39.61	19.91	2	2	0	0	0	0	0	0	0	0
16642	39.67	20.77	484	2	10	10	10	9	9	0	0	9
16642	39.67	20.85	483	2	0	0	0	0	0	0	0	0
16642	39.70	20.82	483	8	0	0	0	0	0	0	0	0
16643	38.95	20.77	4	8	13	13	13	13	13	0	0	13
16643	38.62	20.77	4	8	61	60	60	61	61	57	4	61
16645	39.55	21.77	154	2	0	0	0	0	0	0	0	0
16648	39.63	22.42	72	8	73	73	73	73	73	60	3	73
16648	39.63	22.50	73	2	0	0	0	0	0	0	0	0
16648	39.63	22.45	73	2	0	0	0	0	0	0	0	0
16650	39.93	25.25	9	2	0	0	0	0	0	0	0	0
16650	39.92	25.23	5	8	65	65	65	65	65	53	1	65
16650	39.91	25.23	5	4	0	0	0	0	0	0	0	0
16651	39.88	25.07	4	2	18	18	18	17	17	0	0	17
16651	39.92	25.30	12	4	0	0	0	0	0	0	0	0
16651	39.92	25.25	12	8	1	1	1	1	1	0	0	1
16654	39.17	21.00	11	2	0	0	0	0	0	0	0	0
16656	39.17	21.03	29	2	0	0	0	0	0	0	0	0
16661	39.37	22.95	7	2	0	0	0	0	0	0	0	0
16662	39.12	23.73	17	2	0	0	0	0	0	0	0	0
16664	39.38	23.08	1550	2	0	0	0	0	0	0	0	0
16665	39.22	22.80	15	8	9	9	9	9	9	0	0	9
16667	39.07	26.55	5	8	21	21	21	21	21	0	0	21
16667	39.07	26.60	3	8	61	61	61	61	61	48	0	61
16667	39.07	26.58	3	2	6	6	6	6	6	0	0	6
16667	39.06	26.58	5	2	0	0	0	0	0	0	0	0
16669	38.83	20.72	7	2	2	2	2	2	2	0	0	2
16672	38.62	21.42	47	2	0	0	0	0	0	0	0	0
16672	38.62	21.38	47	2	0	0	0	0	0	0	0	0
16672	38.62	21.45	47	1	0	0	0	0	0	0	0	0
16672	38.60	21.35	24	4	0	0	0	0	0	0	0	0
16674	38.38	23.13	110	2	0	0	0	0	0	0	0	0
16674	38.38	23.10	110	2	0	0	0	0	0	0	0	0
16675	38.90	22.43	105	8	12	12	12	12	12	0	0	12
16675	38.90	22.40	144	8	64	64	64	64	64	23	0	64
16682	37.92	21.45	12	6	14	15	15	14	14	0	0	14
16682	37.92	21.50	11	2	0	0	0	0	0	0	0	0
16682	37.92	21.28	12	8	63	63	63	63	63	60	3	63
16683	38.63	24.10	218	4	9	9	9	9	9	0	0	9
16684	38.90	24.55	5	8	47	47	47	47	47	24	0	47
16684	38.90	24.60	4	4	0	0	0	0	0	0	0	0
16684	38.97	24.48	16	8	31	31	31	31	31	29	0	31
16685	38.20	20.50	8	2	0	0	0	0	0	0	0	0
16685	38.18	20.48	2	2	0	0	0	0	0	0	0	0
16685	38.12	20.50	22	4	0	0	0	0	0	0	0	0
16687	38.17	21.42	23	4	7	8	8	8	8	0	0	8
16687	38.17	21.45	15	1	0	0	0	0	0	0	0	0
16687	38.15	21.42	12	2	0	0	0	0	0	0	0	0
16689	38.25	21.73	3	2	0	0	0	0	0	0	0	0
16690	38.60	21.78	851	2	0	0	0	0	0	0	0	0
16692	38.40	22.53	602	2	0	0	0	0	0	0	0	0
16697	38.47	23.60	6	2	0	0	0	0	0	0	0	0
16699	38.32	23.53	140	2	0	0	0	0	0	0	0	0
16701	38.05	23.67	138	2	0	0	0	0	0	0	0	0
16704	38.37	26.15	61	2	6	6	6	6	6	0	0	6
16705	37.78	20.88	8	2	4	4	4	4	4	0	0	4
16706	38.33	26.13	4	6	0	0	0	0	0	0	0	0
16710	37.52	22.35	662	8	18	18	18	18	18	0	0	18
16710	37.52	22.40	666	2	8	8	8	8	8	1	0	8
16710	37.53	22.40	662	8	59	59	59	59	59	32	3	59
16712	37.93	22.95	2	2	0	0	0	0	0	0	0	0
16714	37.97	23.72	107	2	0	0	0	0	0	0	0	0
16715	38.10	23.77	237	2	0	0	0	0	0	0	0	0
16715	38.10	23.78	235	8	0	0	0	0	0	0	0	0
16716	37.90	23.73	10	8	91	91	91	91	91	61	0	91
16716	37.90	23.80	9	4	0	0	0	0	0	0	0	0
16717	37.93	23.63	2	2	0	0	0	0	0	0	0	0
16717	37.98	23.57	2	4	0	0	0	0	0	0	0	0
16718	38.07	23.55	31	8	7	7	7	7	7	0	0	7
16721	37.73	27.00	49	2	19	19	19	19	19	0	0	19
16721	37.75	26.90	48	4	0	0	0	0	0	0	0	0
16721	37.75	26.87	48	8	3	3	3	3	3	0	0	3
16722	38.17	33.80	1376	2	0	0	0	0	0	0	0	0
16723	37.70	26.92	2	8	64	64	64	64	64	42	0	64
16724	37.03	22.10	5	2	0	0	0	0	0	0	0	0
16726	37.07	22.02	8	4	6	6	6	6	6	6	0	6
16730	37.45	24.95	35	2	1	1	1	1	1	0	0	1
16732	37.10	25.40	9	2	8	8	8	8	8	0	0	8
16732	37.10	25.38	9	8	60	60	60	60	60	32	0	60
16734	36.83	21.72	37	8	23	23	23	22	22	0	0	22
16734	36.83	21.70	33	8	66	68	68	68	68	42	4	68
16735	38.17	24.00	12	2	0	0	0	0	0	0	0	0
16735	38.02	24.00	16	1	0	0	0	0	0	0	0	0
16738	36.72	24.75	183	2	13	13	13	13	13	0	0	13
16738	36.72	24.45	182	8	64	64	64	64	64	35	0	64
16740	36.92	27.42	125	2	0	0	0	0	0	0	0	0
16740	36.80	27.10	-9999	2	0	0	0	0	0	0	0	0
16742	36.67	27.10	125	2	0	0	0	0	0	0	0	0
16742	36.78	27.07	129	8	0	0	0	0	0	0	0	0
16743	36.13	23.00	167	8	24	24	24	23	23	0	0	23
16743	36.15	23.00	167	8	16	16	16	16	16	8	0	16
16743	36.28	23.02	167	4	48	48	48	48	48	18	0	48
16744	36.42	25.43	213	2	0	0	0	0	0	0	0	0
16744	36.40	25.47	42	2	0	0	0	0	0	0	0	0
16746	35.55	24.12	151	8	26	26	26	26	26	9	0	26
16746	35.48	24.12	151	8	51	51	51	51	51	50	0	51
16747	35.50	24.03	63	2	1	2	2	1	1	0	0	1
16748	35.52	27.25	9	4	0	0	0	0	0	0	0	0
16748	35.50	27.22	9	2	0	0	0	0	0	0	0	0
16749	36.37	28.12	40	8	24	24	24	23	23	0	0	23
16749	36.38	28.20	35	4	0	0	0	0	0	0	0	0
16749	36.38	28.12	35	8	5	5	5	5	5	0	0	5
16749	36.38	28.11	37	4	1	1	1	1	1	0	0	1
16749	36.40	28.08	11	8	61	61	61	61	61	61	0	61
16754	35.32	25.25	13	8	19	19	19	18	18	0	0	18
16754	35.33	25.17	37	8	3	3	3	3	3	0	0	3
16754	35.33	25.18	39	8	61	61	61	61	61	61	0	61
16756	35.00	25.75	28	2	0	0	0	0	0	0	0	0
16756	35.00	25.73	13	2	0	0	0	0	0	0	0	0
16757	35.20	26.13	28	8	9	9	9	9	9	0	0	9
16757	35.20	26.10	28	4	0	0	0	0	0	0	0	0
16758	35.35	24.47	41	2	0	0	0	0	0	0	0	0
16758	35.35	24.52	7	2	0	0	0	0	0	0	0	0
16759	35.00	24.75	7	6	8	8	8	8	8	0	0	8
16760	35.18	25.32	336	8	0	0	0	0	0	0	0	0
17020	41.63	32.33	33	1	0	0	0	0	0	0	0	0
17021	41.28	31.42	2	2	0	0	0	0	0	0	0	0
17022	41.45	31.80	136	8	91	91	91	91	91	56	0	91
17022	41.27	31.47	136	4	0	0	0	0	0	0	0	0
17022	41.50	31.80	136	2	0	0	0	0	0	0	0	0
17024	41.98	33.78	64	8	78	78	78	78	78	48	0	78
17024	41.58	33.47	64	2	0	0	0	0	0	0	0	0
17024	42.00	33.80	64	2	0	0	0	0	0	0	0	0
17026	42.03	35.17	32	8	93	93	93	93	93	45	0	93
17026	42.03	35.20	32	4	0	0	0	0	0	0	0	0
17026	42.03	35.16	32	2	0	0	0	0	0	0	0	0
17026	42.02	35.10	32	2	0	0	0	0	0	0	0	0
17026	42.00	35.20	32	2	0	0	0	0	0	0	0	0
17029	41.28	36.30	162	8	4	4	4	4	4	4	0	4
17029	41.27	36.30	168	2	0	0	0	0	0	0	0	0
17030	41.28	36.33	44	8	58	58	58	58	58	32	0	58
17030	41.28	36.40	44	4	0	0	0	0	0	0	0	0
17030	41.16	36.19	44	2	0	0	0	0	0	0	0	0
17031	41.25	36.55	7	8	21	21	21	21	21	21	0	21
17033	40.98	37.90	4	16	0	0	0	0	0	0	0	0
17034	40.92	38.40	38	6	14	14	14	14	14	0	0	14
17034	40.92	38.38	37	8	25	25	25	25	25	23	0	25
17038	41.00	39.72	37	8	92	92	92	92	92	57	0	92
17038	41.00	39.80	35	4	0	0	0	0	0	0	0	0
17038	41.00	39.71	37	4	1	1	1	1	1	0	0	1
17038	41.00	39.42	35	4	0	0	0	0	0	0	0	0
17038	41.00	39.70	30	2	0	0	0	0	0	0	0	0
17050	41.67	26.57	48	8	63	63	63	63	63	55	0	63
17050	41.67	26.60	48	4	0	0	0	0	0	0	0	0
17050	41.66	26.56	48	2	0	0	0	0	0	0	0	0
17050	41.39	26.33	48	2	0	0	0	0	0	0	0	0
17050	41.70	26.60	48	2	0	0	0	0	0	0	0	0
17052	41.73	27.22	232	2	0	0	0	0	0	0	0	0
17052	41.73	27.23	232	24	0	0	0	0	0	0	0	0
17054	41.13	27.92	160	4	0	0	0	0	0	0	0	0
17056	40.98	27.48	55	8	65	65	65	65	65	31	0	65
17056	40.58	27.28	4	2	0	0	0	0	0	0	0	0
17056	41.00	27.50	4	2	0	0	0	0	0	0	0	0
17056	40.98	27.55	3	8	25	25	25	25	25	24	0	25
17059	41.30	29.00	30	2	0	0	0	0	0	0	0	0
17059	41.25	29.03	30	24	0	0	0	0	0	0	0	0
17060	40.97	28.82	27	8	83	83	83	83	83	57	0	83
17060	40.97	28.90	28	4	0	0	0	0	0	0	0	0
17060	40.97	28.83	28	8	5	5	5	5	5	0	0	5
17060	40.96	28.81	27	4	1	1	1	1	1	0	0	1
17060	40.58	28.49	28	2	0	0	0	0	0	0	0	0
17060	41.00	28.80	37	2	0	0	0	0	0	0	0	0
17061	41.12	29.07	100	2	2	2	2	2	2	0	0	2
17061	41.13	29.07	58	2	0	0	0	0	0	0	0	0
17062	40.97	29.08	40	2	0	0	0	0	0	0	0	0
17063	40.88	29.30	99	8	0	0	0	0	0	0	0	0
17066	40.77	29.90	76	8	8	8	8	8	7	0	0	7
17067	40.72	29.82	19	8	48	48	48	48	48	31	0	48
17067	40.71	29.81	18	2	0	0	0	0	0	0	0	0
17067	40.42	29.49	18	2	0	0	0	0	0	0	0	0
17067	40.67	29.83	18	8	25	25	25	25	25	17	0	25
17068	40.73	30.08	70	2	0	0	0	0	0	0	0	0
17068	40.85	29.90	70	8	0	0	0	0	0	0	0	0
17069	40.78	30.42	30	2	0	0	0	0	0	0	0	0
17070	40.73	31.60	742	8	66	66	66	66	66	55	0	66
17070	40.70	31.60	742	2	0	0	0	0	0	0	0	0
17072	40.83	31.17	146	1	0	0	0	0	0	0	0	0
17074	41.37	33.77	799	6	20	20	20	20	20	0	0	20
17074	41.37	33.78	800	8	25	25	25	25	25	19	0	25
17078	41.20	32.63	259	1	0	0	0	0	0	0	0	0
17080	40.60	33.62	752	24	0	0	0	0	0	0	0	0
17082	40.88	35.48	563	8	26	26	26	26	26	0	0	26
17082	40.85	35.58	544	8	44	44	44	44	44	32	0	44
17082	40.50	35.30	543	4	0	0	0	0	0	0	0	0
17082	40.90	35.60	535	2	0	0	0	0	0	0	0	0
17084	40.55	34.97	798	8	45	44	44	44	44	30	0	44
17084	40.33	34.58	837	2	0	0	0	0	0	0	0	0
17084	40.60	35.00	837	2	0	0	0	0	0	0	0	0
17084	40.55	34.95	776	8	25	25	25	25	25	25	0	25
17085	40.65	35.85	412	8	9	9	9	9	9	8	0	9
17086	40.30	36.57	608	8	17	17	17	17	17	17	0	17
17088	40.45	39.45	1219	2	0	0	0	0	0	0	0	0
17088	40.47	39.47	1219	8	0	6	6	6	6	5	0	6
17090	39.75	37.02	1285	8	12	54	54	54	54	7	0	54
17090	39.75	37.10	1285	4	0	0	0	0	0	0	0	0
17090	39.75	37.01	1285	2	0	0	0	0	0	0	0	0
17090	39.44	37.00	1285	4	0	0	0	0	0	0	0	0
17090	39.80	37.00	1271	6	0	2	2	2	2	0	0	2
17092	39.73	39.50	1214	8	53	67	67	67	67	32	0	67
17092	39.44	39.30	1156	2	0	0	0	0	0	0	0	0
17092	39.70	39.50	1215	2	0	0	0	0	0	0	0	0
17092	39.75	39.50	1218	8	0	1	1	1	1	1	0	1
17092	39.70	39.52	1154	8	0	6	6	6	6	6	0	6
17110	40.18	25.90	71	8	36	36	36	36	36	28	0	36
17111	39.83	26.07	30	1	0	0	0	0	0	0	0	0
17112	40.13	26.40	3	8	93	94	94	93	93	56	0	93
17112	40.08	26.24	8	2	0	0	0	0	0	0	0	0
17112	40.10	26.40	3	2	0	0	0	0	0	0	0	0
17115	40.35	27.95	49	8	11	11	11	11	11	0	0	11
17115	40.32	28.00	55	4	0	0	0	0	0	0	0	0
17115	40.32	27.98	55	8	6	6	6	5	5	0	0	5
17115	40.31	27.96	51	4	0	0	0	0	0	0	0	0
17115	40.32	27.97	49	8	61	61	61	61	61	56	0	61
17115	40.19	27.58	51	2	0	0	0	0	0	0	0	0
17115	40.30	28.00	49	2	0	0	0	0	0	0	0	0
17116	40.23	29.02	101	8	16	16	16	16	16	0	0	16
17116	40.18	29.10	101	4	0	0	0	0	0	0	0	0
17116	40.18	29.07	101	8	67	67	67	67	67	56	0	67
17116	40.23	29.01	101	2	0	0	0	0	0	0	0	0
17116	40.13	29.00	101	2	0	0	0	0	0	0	0	0
17116	40.20	29.10	100	2	0	0	0	0	0	0	0	0
17117	40.08	29.25	2438	2	0	0	0	0	0	0	0	0
17118	40.23	29.53	238	8	0	0	0	0	0	0	0	0
17119	40.67	29.28	4	1	0	0	0	0	0	0	0	0
17120	40.15	29.97	539	8	0	0	0	0	0	0	0	0
17124	39.77	30.52	786	8	24	24	24	24	24	0	0	24
17124	39.78	30.60	779	4	0	0	0	0	0	0	0	0
17124	39.78	30.58	779	8	5	5	5	5	5	0	0	5
17124	39.78	30.56	785	4	1	1	1	1	1	0	0	1
17124	39.78	30.57	785	8	61	61	61	61	61	57	0	61
17124	39.47	30.33	785	4	0	0	0	0	0	0	0	0
17124	39.80	30.60	785	2	0	0	0	0	0	0	0	0
17127	40.08	32.57	840	2	3	3	3	3	3	0	0	3
17127	40.05	32.33	840	2	0	0	0	0	0	0	0	0
17127	40.24	32.57	840	2	0	0	0	0	0	0	0	0
17127	40.07	32.57	840	8	0	0	0	0	0	0	0	0
17128	40.13	33.00	953	2	0	0	0	0	0	0	0	0
17128	40.12	33.00	953	8	25	25	25	25	25	25	0	25
17128	40.12	32.98	953	8	36	36	36	36	36	32	0	36
17128	40.11	32.98	952	4	1	1	1	1	1	0	0	1
17128	40.07	32.58	953	2	0	0	0	0	0	0	0	0
17129	39.95	32.68	806	8	68	68	68	68	68	30	0	68
17129	39.95	32.70	799	4	0	0	0	0	0	0	0	0
17129	39.57	32.41	799	2	0	0	0	0	0	0	0	0
17130	39.95	32.88	894	8	2	2	2	2	2	2	0	2
17131	39.93	32.75	823	8	0	0	0	0	0	0	0	0
17135	39.85	33.52	748	8	8	8	8	8	8	8	0	8
17140	39.82	34.80	1298	8	0	7	7	7	7	6	0	7
17145	39.58	27.02	21	2	0	0	0	0	0	0	0	0
17150	39.65	27.87	101	8	14	14	14	14	14	0	0	14
17150	39.62	28.00	106	2	0	0	0	0	0	0	0	0
17150	39.62	27.93	106	8	5	5	5	5	5	0	0	5
17150	39.61	27.91	106	2	0	0	0	0	0	0	0	0
17150	39.62	27.92	102	8	61	61	61	61	61	57	0	61
17150	39.36	27.55	106	4	0	0	0	0	0	0	0	0
17150	39.60	27.90	102	2	0	0	0	0	0	0	0	0
17155	39.42	29.97	969	8	17	17	17	17	17	16	0	17
17160	39.13	34.17	985	6	20	20	20	20	20	0	0	20
17160	39.15	34.17	1007	8	0	7	7	7	7	6	0	7
17162	39.18	36.05	1173	2	3	2	2	3	3	0	0	3
17162	39.18	36.07	1171	4	0	0	0	0	0	0	0	0
17165	39.12	39.55	981	1	0	0	0	0	0	0	0	0
17175	39.30	26.70	4	8	8	8	8	8	8	6	0	8
17180	39.05	26.87	3	8	36	36	36	36	36	31	0	36
17180	39.05	26.86	3	2	0	0	0	0	0	0	0	0
17180	39.02	26.52	3	4	0	0	0	0	0	0	0	0
17180	39.10	26.90	3	2	0	0	0	0	0	0	0	0
17180	39.07	26.88	3	4	4	4	4	4	4	0	0	4
17184	38.92	27.85	101	8	92	92	92	92	92	55	0	92
17184	38.92	27.90	93	4	0	0	0	0	0	0	0	0
17184	38.91	27.85	93	2	0	0	0	0	0	0	0	0
17184	38.55	27.50	93	2	0	0	0	0	0	0	0	0
17184	38.90	27.90	93	2	0	0	0	0	0	0	0	0
17186	38.62	27.43	71	2	0	0	0	0	0	0	0	0
17188	38.67	29.42	921	8	63	63	63	63	63	30	0	63
17188	38.67	29.50	919	4	0	0	0	0	0	0	0	0
17188	38.66	29.41	919	2	0	0	0	0	0	0	0	0
17188	38.39	29.25	919	2	0	0	0	0	0	0	0	0
17188	38.70	29.40	919	2	0	0	0	0	0	0	0	0
17188	38.68	29.40	919	8	25	25	25	25	25	25	0	25
17190	38.75	30.53	1014	8	37	58	58	58	58	38	0	58
17190	38.73	30.60	1010	1	0	0	0	0	0	0	0	0
17190	38.44	30.32	1034	2	0	0	0	0	0	0	0	0
17190	38.80	30.50	1034	2	0	0	0	0	0	0	0	0
17191	38.65	32.95	969	1	0	0	0	0	0	0	0	0
17192	38.38	34.05	961	1	0	0	0	0	0	0	0	0
17193	38.62	34.72	1260	2	0	0	0	0	0	0	0	0
17193	38.62	34.70	1260	8	0	0	0	0	0	0	0	0
17195	38.78	35.48	1054	8	45	59	59	59	59	31	0	59
17195	38.78	35.50	1052	4	0	0	0	0	0	0	0	0
17195	38.47	35.28	1052	4	0	0	0	0	0	0	0	0
17195	38.80	35.50	1054	2	0	0	0	0	0	0	0	0
17195	38.82	35.43	1054	8	0	7	7	7	7	7	0	7
17196	38.72	35.48	1070	8	5	5	5	5	5	0	0	5
17199	38.35	38.32	948	8	17	17	17	17	17	17	0	17
17200	38.43	38.08	998	8	74	74	74	74	74	39	0	74
17200	38.25	38.05	862	2	0	0	0	0	0	0	0	0
17200	38.40	38.10	849	2	0	0	0	0	0	0	0	0
17202	38.62	39.30	903	8	12	12	12	12	12	0	0	12
17202	38.60	39.28	903	8	59	59	59	59	59	56	0	59
17202	38.36	39.16	903	2	0	0	0	0	0	0	0	0
17202	38.67	39.22	1105	2	0	0	0	0	0	0	0	0
17202	38.60	39.30	882	2	0	0	0	0	0	0	0	0
17218	38.50	27.02	8	8	41	41	41	41	41	13	0	41
17218	38.55	27.10	5	4	0	0	0	0	0	0	0	0
17218	38.55	27.02	5	8	5	5	5	5	5	0	0	5
17218	38.50	27.01	6	4	1	1	1	1	1	0	0	1
17218	38.30	27.00	5	2	0	0	0	0	0	0	0	0
17218	38.52	27.02	5	8	0	0	0	0	0	0	0	0
17219	38.33	27.22	108	2	0	0	0	0	0	0	0	0
17219	38.27	27.15	120	8	44	44	44	44	44	44	0	44
17219	38.30	27.20	120	2	0	0	0	0	0	0	0	0
17220	38.43	27.17	25	2	0	0	0	0	0	0	0	0
17221	38.30	26.30	5	1	0	0	0	0	0	0	0	0
17232	37.87	27.25	22	8	0	0	0	0	0	0	0	0
17234	37.85	27.85	57	8	55	55	55	55	55	54	0	55
17234	31.85	27.85	57	8	15	15	15	15	15	0	0	15
17234	37.90	27.90	57	2	0	0	0	0	0	0	0	0
17237	37.77	29.08	428	6	14	14	14	14	14	0	0	14
17237	37.78	29.08	425	8	25	25	25	25	25	24	0	25
17238	37.67	30.33	967	2	0	0	0	0	0	0	0	0
17240	37.75	30.55	1043	8	93	93	93	93	93	57	0	93
17240	37.44	30.33	997	4	0	0	0	0	0	0	0	0
17240	37.80	30.60	997	2	0	0	0	0	0	0	0	0
17241	37.85	30.37	870	1	0	0	0	0	0	0	0	0
17244	37.98	32.57	1022	8	27	27	27	27	27	0	0	27
17244	37.97	32.55	1032	8	24	45	45	45	45	39	0	45
17244	37.96	32.55	1022	4	1	1	1	1	1	0	0	1
17244	37.58	32.33	1032	4	0	0	0	0	0	0	0	0
17244	38.00	32.60	1006	2	0	0	0	0	0	0	0	0
17248	37.50	34.07	1044	6	10	10	10	10	10	0	0	10
17248	37.50	34.05	1044	8	0	7	7	7	7	5	0	7
17250	37.97	34.68	1208	8	0	7	7	7	7	7	0	7
17255	37.60	36.93	549	8	8	8	8	8	8	7	0	8
17260	37.08	37.37	855	8	70	70	70	70	70	56	0	70
17260	37.10	37.40	855	2	0	0	0	0	0	0	0	0
17262	36.72	37.12	638	1	0	0	0	0	0	0	0	0
17265	37.75	38.28	672	2	0	0	0	0	0	0	0	0
17270	37.13	38.77	547	8	37	37	37	37	37	20	0	37
17271	37.43	38.90	822	1	0	0	0	0	0	0	0	0
17272	37.10	38.85	452	8	1	1	1	1	1	1	0	1
17290	37.03	27.42	3	6	31	31	31	31	31	26	0	31
17290	37.03	27.43	27	8	25	25	25	25	25	21	0	25
17290	37.00	27.40	27	1	0	0	0	0	0	0	0	0
17291	37.23	27.67	11	1	0	0	0	0	0	0	0	0
17292	37.20	28.35	646	8	64	64	64	64	64	30	0	64
17292	37.20	28.40	646	4	0	0	0	0	0	0	0	0
17292	37.11	28.21	646	2	0	0	0	0	0	0	0	0
17292	37.22	28.37	646	8	25	25	25	25	25	24	0	25
17295	36.70	28.78	2	8	17	17	17	17	17	17	0	17
17296	36.62	29.12	3	1	0	0	0	0	0	0	0	0
17297	36.70	27.67	28	1	0	0	0	0	0	0	0	0
17298	36.83	28.27	3	2	0	0	0	0	0	0	0	0
17298	36.85	28.27	16	8	0	0	0	0	0	0	0	0
17300	36.88	30.70	43	8	24	24	24	24	24	0	0	24
17300	36.70	30.80	50	4	0	0	0	0	0	0	0	0
17300	36.70	30.73	50	8	42	42	42	42	42	31	0	42
17300	36.53	30.47	50	2	0	0	0	0	0	0	0	0
17300	36.70	30.70	57	2	0	0	0	0	0	0	0	0
17300	36.87	30.73	54	8	25	25	25	25	25	25	0	25
17302	36.87	30.70	47	1	0	0	0	0	0	0	0	0
17310	36.55	32.00	6	8	24	24	24	24	24	23	0	24
17320	36.10	32.83	4	2	0	0	0	0	0	0	0	0
17320	36.08	32.83	4	8	17	17	17	17	17	13	0	17
17330	36.37	33.93	15	8	65	66	66	66	65	28	0	65
17330	36.37	34.00	15	4	0	0	0	0	0	0	0	0
17330	36.36	33.93	15	2	0	0	0	0	0	0	0	0
17330	36.22	33.55	15	2	0	0	0	0	0	0	0	0
17330	36.40	33.90	15	2	0	0	0	0	0	0	0	0
17330	36.38	33.93	15	8	25	25	25	25	25	18	0	25
17340	36.82	34.60	3	2	0	0	0	0	0	0	0	0
17340	36.80	34.63	3	8	0	0	0	0	0	0	0	0
17350	37.00	35.43	74	24	17	18	18	19	18	0	0	18
17350	36.98	35.30	73	4	0	0	0	0	0	0	0	0
17350	36.98	35.28	73	8	5	5	5	5	5	0	0	5
17350	37.00	35.42	66	8	63	63	63	63	63	56	0	63
17355	37.17	36.17	120	1	0	0	0	0	0	0	0	0
17370	36.58	36.17	3	8	71	71	71	71	71	54	0	71
17372	35.15	33.50	117	2	0	0	0	0	0	0	0	0
17372	36.20	36.17	100	1	0	0	0	0	0	0	0	0
17375	36.30	30.15	3	8	25	25	25	25	25	24	0	25
17380	36.20	29.65	153	1	0	0	0	0	0	0	0	0
17600	34.75	32.40	9	8	10	10	10	10	10	9	0	10
17600	34.44	32.24	9	2	0	0	0	0	0	0	0	0
17600	34.72	32.48	11	8	48	48	48	48	48	45	0	48
17601	34.58	32.98	28	8	71	71	71	71	71	61	0	71
17601	34.58	33.00	23	4	0	0	0	0	0	0	0	0
17601	34.58	35.98	23	2	0	0	0	0	0	0	0	0
17601	34.35	32.58	23	2	0	0	0	0	0	0	0	0
17602	35.30	32.95	12	2	0	0	0	0	0	0	0	0
17606	35.15	33.28	217	8	22	22	22	22	22	0	0	22
17607	35.15	33.40	161	4	37	37	37	37	37	0	0	37
17609	34.88	33.63	2	8	65	65	65	65	65	61	0	65
17609	34.52	33.38	2	2	0	0	0	0	0	0	0	0
17609	34.90	33.60	2	2	0	0	0	0	0	0	0	0
17611	35.08	33.90	37	8	33	33	33	33	33	0	0	33
33791	43.03	33.22	124	8	6	6	6	6	6	0	0	6
33945	44.50	33.57	170	1	0	0	0	0	0	0	0	0
33945	44.83	33.95	170	2	0	0	0	0	0	0	0	0
33946	44.68	34.13	181	8	31	31	31	31	31	12	0	31
33959	44.68	34.42	5	2	1	1	1	1	1	0	0	1
33959	44.41	34.25	5	1	0	0	0	0	0	0	0	0
33959	44.68	34.50	5	2	0	0	0	0	0	0	0	0
33959	44.68	34.43	7	1	0	0	0	0	0	0	0	0
33969	44.85	34.97	59	2	0	0	0	0	0	0	0	0
33990	44.50	34.17	14	8	45	45	45	45	45	13	0	45
33990	44.30	34.10	14	1	0	0	0	0	0	0	0	0
33990	44.50	34.20	14	2	0	0	0	0	0	0	0	0
33990	44.50	34.16	14	4	0	0	0	0	0	0	0	0
33990	44.48	34.17	72	8	7	7	7	7	7	2	0	7
33992	44.77	33.55	201	2	0	0	0	0	0	0	0	0
33992	44.75	33.87	201	2	0	0	0	0	0	0	0	0
33994	44.58	33.38	85	2	0	0	0	0	0	0	0	0
33994	44.68	33.57	85	2	4	4	4	4	4	0	0	4
33996	44.67	34.42	61	2	0	0	0	0	0	0	0	0
33998	44.43	34.08	1180	2	0	0	0	0	0	0	0	0
33999	44.47	34.07	1180	2	1	1	1	1	1	0	0	1
33999	44.28	34.04	1180	1	0	0	0	0	0	0	0	0
33999	44.47	34.10	1180	2	0	0	0	0	0	0	0	0
33999	44.46	34.06	1180	1	0	0	0	0	0	0	0	0
37000	44.72	37.78	37	2	6	6	6	6	6	0	0	6
37000	44.72	37.77	30	2	10	10	10	10	10	0	0	10
37001	44.90	37.30	6	2	16	16	16	15	14	0	0	14
37001	44.88	37.28	32	8	3	3	3	3	3	3	0	3
37004	44.57	38.08	4	2	1	1	1	1	0	0	0	0
37004	44.57	38.10	4	2	0	0	0	0	0	0	0	0
37004	44.57	38.02	27	2	0	0	0	0	0	0	0	0
37006	44.37	38.53	3	2	0	0	0	0	0	0	0	0
37009	44.33	38.72	25	2	5	5	5	5	5	0	0	5
37009	44.33	38.80	25	2	0	0	0	0	0	0	0	0
37013	44.75	39.90	132	2	0	0	0	0	0	0	0	0
37013	44.45	39.54	132	1	0	0	0	0	0	0	0	0
37014	44.63	39.10	67	2	4	4	4	4	4	0	0	4
37014	44.38	39.06	67	1	0	0	0	0	0	0	0	0
37017	44.28	39.27	324	2	0	1	1	1	1	0	0	1
37017	44.17	39.16	324	1	0	0	0	0	0	0	0	0
37018	44.10	39.07	96	8	91	91	91	91	91	7	0	91
37018	44.05	39.03	96	1	0	0	0	0	0	0	0	0
37099	43.58	39.72	57	4	19	17	17	19	19	0	0	19
37099	43.35	39.43	0	1	0	0	0	0	0	0	0	0
37099	43.58	39.77	34	1	0	0	0	0	0	0	0	0
37171	43.45	39.90	4	8	38	38	38	38	38	4	0	38
37171	43.27	39.53	13	2	0	0	0	0	0	0	0	0
37171	43.27	39.54	16	1	0	0	0	0	0	0	0	0
37171	43.43	39.90	13	8	29	29	29	29	29	0	0	29
37171	43.50	39.90	16	1	0	0	0	0	0	0	0	0
37978	39.70	38.60	4	2	0	0	0	0	0	0	0	0
40005	36.82	38.00	351	2	0	0	0	0	0	0	0	0
40007	36.18	37.22	392	8	63	63	63	63	63	17	0	63
40007	36.18	37.30	389	4	0	0	0	0	0	0	0	0
40007	36.18	37.23	389	4	4	4	4	4	4	0	0	4
40007	36.20	37.20	393	2	0	0	0	0	0	0	0	0
40007	36.18	37.20	384	8	28	28	28	28	28	17	0	28
40007	36.33	37.22	425	6	0	0	0	0	0	0	0	0
40009	36.70	38.95	349	4	48	49	49	49	49	8	0	48
40009	36.41	38.57	348	4	0	0	0	0	0	0	0	0
40009	36.70	39.00	349	2	0	0	0	0	0	0	0	0
40017	35.93	36.62	451	2	0	0	0	0	0	0	0	0
40022	35.55	35.75	8	4	12	12	12	12	12	0	0	12
40022	35.50	35.80	7	2	0	0	0	0	0	0	0	0
40022	35.50	35.78	7	2	8	8	8	8	7	2	0	7
40022	35.30	35.47	7	2	0	0	0	0	0	0	0	0
40022	35.53	35.77	7	8	50	50	50	50	50	22	0	50
40025	35.40	35.95	30	2	0	0	0	0	0	0	0	0
40025	35.75	35.95	46	1	0	0	0	0	0	0	0	0
40025	35.72	35.95	46	2	0	0	0	0	0	0	0	0
40025	35.40	35.93	50	8	27	27	27	28	28	17	0	28
40027	35.40	37.85	460	2	0	0	0	0	0	0	0	0
40029	35.00	37.03	481	2	0	0	0	0	0	0	0	0
40030	35.13	36.75	322	2	19	19	19	19	19	0	0	19
40030	35.08	36.44	310	2	0	0	0	0	0	0	0	0
40030	35.13	36.72	309	4	27	27	27	27	27	12	0	27
40030	35.10	36.70	309	2	0	0	0	0	0	0	0	0
40030	35.12	36.75	303	8	28	28	28	28	28	22	0	28
40039	35.95	39.00	250	8	23	23	23	23	23	0	0	23
40039	35.93	39.10	245	4	0	0	0	0	0	0	0	0
40039	35.93	39.02	245	4	50	50	50	50	49	20	0	49
40039	35.93	39.01	245	2	0	0	0	0	0	0	0	0
40039	35.55	39.00	245	2	0	0	0	0	0	0	0	0
40039	35.90	39.00	246	2	0	0	0	0	0	0	0	0
40041	34.93	36.73	450	2	0	0	0	0	0	0	0	0
40050	34.88	35.88	5	2	0	0	0	0	0	0	0	0
40055	34.75	36.72	485	2	0	0	0	0	0	0	0	0
40061	34.55	38.30	404	4	75	75	75	75	75	21	0	75
40061	34.33	38.17	395	2	0	0	0	0	0	0	0	0
40061	34.60	38.30	404	2	0	0	0	0	0	0	0	0
40066	34.82	36.13	359	8	62	62	62	63	62	31	0	62
40066	34.81	36.13	353	2	0	0	0	0	0	0	0	0
40066	34.49	36.08	353	2	0	0	0	0	0	0	0	0
40066	34.80	36.10	359	2	0	0	0	0	0	0	0	0
40067	32.70	35.60	997	2	0	0	0	0	0	0	0	0
40076	33.12	35.82	941	2	0	0	0	0	0	0	0	0
40079	33.48	36.23	729	4	4	11	11	11	11	0	0	11
40080	33.42	36.52	615	8	75	75	75	75	75	38	0	75
40080	33.42	36.60	615	4	0	0	0	0	0	0	0	0
40080	33.41	36.51	611	4	1	1	1	1	1	0	0	1
40080	33.25	36.30	610	2	0	0	0	0	0	0	0	0
40080	33.40	36.50	611	2	0	0	0	0	0	0	0	0
40083	34.03	36.72	1333	2	9	21	21	21	21	2	0	21
40083	34.03	36.71	1330	2	0	0	0	0	0	0	0	0
40083	34.02	36.42	1330	4	0	0	0	0	0	0	0	0
40083	34.00	36.70	1333	2	0	0	0	0	0	0	0	0
40085	33.78	37.70	825	2	0	0	0	0	0	0	0	0
40087	33.48	38.67	708	4	34	36	36	36	36	0	0	35
40087	33.48	38.70	707	4	0	0	0	0	0	0	0	0
40087	33.48	38.66	708	2	0	0	0	0	0	0	0	0
40087	33.28	38.39	707	2	0	0	0	0	0	0	0	0
40087	33.50	38.70	708	2	0	0	0	0	0	0	0	0
40091	32.77	35.70	339	2	1	1	1	1	1	0	0	1
40095	32.60	36.10	543	6	50	48	48	50	50	22	0	50
40100	33.82	35.48	24	8	66	66	66	66	66	35	0	66
40100	33.81	35.48	19	2	0	0	0	0	0	0	0	0
40100	33.49	35.28	26	2	0	0	0	0	0	0	0	0
40100	33.80	35.50	19	1	0	0	0	0	0	0	0	0
40101	33.82	35.85	920	8	0	30	30	30	30	21	0	29
40102	33.87	36.00	921	2	0	0	0	0	0	0	0	0
40102	33.52	36.00	927	2	0	0	0	0	0	0	0	0
40103	34.45	35.80	10	4	47	47	47	47	47	10	0	47
40103	34.27	35.47	6	2	0	0	0	0	0	0	0	0
40104	33.37	35.58	773	2	0	0	0	0	0	0	0	0
40105	34.25	36.05	1915	4	1	1	1	1	1	0	0	1
40105	34.14	36.02	1915	2	0	0	0	0	0	0	0	0
40106	33.83	35.88	918	2	0	0	0	0	0	0	0	0
40110	33.82	35.77	1524	4	8	8	8	8	8	0	0	8
40110	33.82	35.80	1524	1	0	0	0	0	0	0	0	0
40110	33.81	35.76	1524	2	0	0	0	0	0	0	0	0
40110	33.49	35.46	1524	2	0	0	0	0	0	0	0	0
40153	32.98	35.50	936	2	0	0	0	0	0	0	0	0
40154	32.82	35.00	8	4	6	6	6	6	6	0	0	6
40155	32.82	34.95	9	4	13	13	13	13	13	2	0	13
40155	32.82	34.97	9	2	0	0	0	0	0	0	0	0
40155	32.80	35.03	8	8	30	30	30	30	30	30	0	30
40165	32.67	35.18	51	8	28	27	27	28	28	9	0	28
40165	32.67	35.20	49	2	0	0	0	0	0	0	0	0
40165	32.66	35.18	51	2	0	0	0	0	0	0	0	0
40165	32.70	35.20	50	2	0	0	0	0	0	0	0	0
40177	32.10	34.78	11	8	34	34	34	34	34	19	0	34
40179	32.00	34.82	30	8	6	6	6	6	6	6	0	6
40180	32.00	34.90	49	8	75	76	76	75	76	55	0	75
40183	31.82	34.63	3	4	1	1	1	1	1	0	0	1
40183	31.49	34.38	3	1	0	0	0	0	0	0	0	0
40184	31.78	35.22	809	4	5	11	11	11	10	0	0	10
40184	31.78	35.21	809	2	0	0	0	0	0	0	0	0
40190	31.25	34.80	280	1	0	0	0	0	0	0	0	0
40191	31.23	34.78	280	4	56	56	55	56	56	16	0	56
40191	31.23	34.80	275	2	0	0	0	0	0	0	0	0
40191	31.20	34.80	280	1	0	0	0	0	0	0	0	0
40192	31.03	35.37	-389	2	0	0	0	0	0	0	0	0
40198	30.00	34.83	445	8	24	24	24	24	24	19	0	24
40199	29.55	34.95	11	8	84	84	84	84	84	43	0	84
40199	29.60	35.00	13	2	0	0	0	0	0	0	0	0
40215	32.32	35.02	-9999	1	0	0	0	0	0	0	0	0
40223	32.22	35.25	-9999	2	0	0	0	0	0	0	0	0
40224	32.35	35.27	-9999	1	0	0	0	0	0	0	0	0
40226	32.47	35.30	-9999	1	0	0	0	0	0	0	0	0
40230	32.55	35.85	630	8	62	64	64	63	62	29	0	62
40230	31.23	34.27	-9999	2	0	0	0	0	0	0	0	0
40240	31.53	35.10	-9999	1	0	0	0	0	0	0	0	0
40242	31.93	35.22	-9999	1	0	0	0	0	0	0	0	0
40250	32.50	38.20	691	6	72	77	77	76	76	30	0	75
40250	32.30	38.11	686	2	0	0	0	0	0	0	0	0
40253	32.63	35.62	-170	1	0	0	0	0	0	0	0	0
40255	32.55	32.85	618	4	2	2	2	2	1	0	0	1
40256	32.40	35.58	-200	2	0	0	0	0	0	0	0	0
40257	32.37	35.75	1150	2	0	0	0	0	0	0	0	0
40260	32.28	37.13	713	4	16	16	16	16	16	0	0	16
40260	32.20	37.13	668	8	59	60	60	60	60	27	0	60
40260	32.11	37.08	668	2	0	0	0	0	0	0	0	0
40260	32.20	37.10	670	2	0	0	0	0	0	0	0	0
40265	32.33	36.23	686	6	2	2	2	2	2	0	0	2
40265	32.37	36.27	686	2	4	4	4	4	4	0	0	4
40265	32.37	36.25	687	8	46	47	47	46	46	29	0	45
40265	32.40	36.30	687	2	0	0	0	0	0	0	0	0
40267	32.15	36.28	580	1	0	0	0	0	0	0	0	0
40268	32.03	35.73	915	2	0	0	0	0	0	0	0	0
40270	31.95	35.95	767	8	2	2	2	2	2	0	0	2
40270	31.98	35.98	767	8	85	86	86	85	85	42	0	84
40270	31.98	36.00	767	4	0	0	0	0	0	0	0	0
40270	31.58	35.58	767	2	0	0	0	0	0	0	0	0
40270	32.00	36.00	773	2	0	0	0	0	0	0	0	0
40272	31.67	35.98	721	2	0	0	0	0	0	0	0	0
40272	31.67	35.97	721	8	27	29	29	28	27	16	0	27
40272	31.70	36.00	721	2	0	0	0	0	0	0	0	0
40272	31.72	35.98	722	8	19	19	19	19	19	18	0	19
40275	31.25	36.12	768	1	0	0	0	0	0	0	0	0
40280	31.87	35.50	-276	2	0	0	0	0	0	0	0	0
40280	31.86	35.50	276	2	0	0	0	0	0	0	0	0
40280	31.52	35.30	276	2	0	0	0	0	0	0	0	0
40285	32.22	35.62	-224	2	0	0	0	0	0	0	0	0
40288	31.83	36.82	527	1	0	0	0	0	0	0	0	0
40290	31.87	35.22	755	2	6	8	8	8	8	0	0	8
40296	31.03	35.47	350	8	41	43	43	42	42	27	0	42
40296	31.00	35.50	-350	2	0	0	0	0	0	0	0	0
40298	30.78	35.72	1200	1	0	0	0	0	0	0	0	0
40300	30.52	35.62	1365	4	0	0	0	0	0	0	0	0
40300	30.52	35.53	1365	1	0	0	0	0	0	0	0	0
40305	30.28	36.15	853	1	0	0	0	0	0	0	0	0
40310	30.17	35.78	1006	6	8	45	45	44	44	24	0	44
40310	30.17	35.80	1069	4	0	0	0	0	0	0	0	0
40310	30.17	35.77	1069	4	3	3	3	3	3	0	0	3
40310	30.16	35.78	1070	4	1	1	1	1	1	0	0	1
40310	30.10	35.47	1069	2	0	0	0	0	0	0	0	0
40310	30.20	35.80	1070	2	0	0	0	0	0	0	0	0
40340	29.55	35.00	8	8	19	19	19	19	19	16	0	19
40340	29.63	35.02	53	4	34	36	36	35	35	18	0	35
40340	29.63	35.01	53	2	0	0	0	0	0	0	0	0
40340	29.38	35.00	53	2	0	0	0	0	0	0	0	0
40341	29.48	34.98	3	2	4	4	4	4	4	0	0	4
40356	31.68	38.65	829	2	2	3	3	3	2	0	0	2
40356	31.68	38.70	830	2	0	0	0	0	0	0	0	0
40356	31.68	38.67	830	8	14	14	14	14	14	0	0	14
40356	31.68	38.66	824	2	0	0	0	0	0	0	0	0
40356	31.41	38.39	827	4	0	0	0	0	0	0	0	0
40356	31.70	38.70	813	2	0	0	0	0	0	0	0	0
40356	31.68	38.73	852	8	0	24	24	24	24	0	0	24
40360	31.33	37.33	-9999	2	0	0	0	0	0	0	0	0
40360	31.43	37.23	570	2	0	0	0	0	0	0	0	0
40360	31.42	37.27	504	8	20	20	20	20	20	0	0	20
40360	31.40	37.30	504	2	0	0	0	0	0	0	0	0
40360	31.40	37.27	504	8	5	5	5	5	5	0	0	5
40360	31.40	37.28	504	8	24	24	24	24	24	0	0	24
40366	31.23	38.20	843	1	0	0	0	0	0	0	0	0
40369	29.50	35.00	2	1	0	0	0	0	0	0	0	0
40641	32.87	39.32	800	2	0	0	0	0	0	0	0	0
40641	32.72	38.73	800	2	0	0	0	0	0	0	0	0
60100	35.78	-5.82	86	2	0	0	0	0	0	0	0	0
60101	35.72	-5.90	15	4	27	27	27	27	27	6	0	27
60101	35.71	-5.90	15	2	0	0	0	0	0	0	0	0
60101	35.73	-5.90	21	8	54	54	54	54	54	54	0	54
60105	35.18	-6.13	49	4	47	42	42	48	48	43	0	47
60105	35.18	-6.10	49	2	0	0	0	0	0	0	0	0
60106	35.07	-5.30	305	4	17	17	17	16	16	14	0	16
60107	35.18	-3.85	14	8	61	61	61	61	61	56	0	61
60107	35.18	-3.80	27	2	0	0	0	0	0	0	0	0
60115	34.78	-1.95	478	8	30	30	30	30	30	6	0	30
60115	34.78	-1.93	470	8	54	54	54	54	54	54	0	54
60119	34.30	-6.60	12	2	22	22	22	22	22	1	0	22
60127	34.22	-4.00	510	8	86	86	86	86	86	57	0	86
60127	34.21	-4.00	510	4	1	1	1	1	1	0	0	1
60135	34.05	-6.77	76	8	76	76	76	76	76	60	0	76
60135	34.05	-6.76	76	2	0	0	0	0	0	0	0	0
60136	34.23	-6.07	67	8	7	7	7	7	7	0	0	7
60136	34.23	-6.05	52	2	2	2	2	2	2	1	0	2
60140	34.03	-4.98	414	2	0	0	0	0	0	0	0	0
60141	33.93	-4.98	579	8	66	66	66	66	66	60	0	66
60141	33.93	-4.90	579	2	0	0	0	0	0	0	0	0
60146	33.72	-7.40	6	2	0	0	0	0	0	0	0	0
60150	33.88	-5.53	549	8	89	89	89	89	89	55	0	89
60155	33.57	-7.67	58	8	83	83	83	83	83	60	0	83
60155	33.57	-7.60	61	2	0	0	0	0	0	0	0	0
60155	33.56	-7.66	58	2	0	0	0	0	0	0	0	0
60156	33.37	-7.58	212	8	64	64	64	64	64	51	0	64
60156	33.37	-7.62	200	8	8	8	8	8	8	6	0	8
60156	33.36	-7.61	206	4	1	1	1	1	1	0	0	1
60160	33.50	-5.17	1664	2	0	2	2	2	2	0	0	2
60160	33.50	-5.10	1664	2	0	0	0	0	0	0	0	0
60165	33.23	-8.52	28	2	0	0	0	0	0	0	0	0
60178	32.87	-6.97	785	2	0	0	0	0	0	0	0	0
60178	32.86	-6.96	785	1	0	0	0	0	0	0	0	0
60185	32.28	-9.23	45	8	80	80	80	80	80	54	0	80
60185	32.28	-9.20	46	2	0	0	0	0	0	0	0	0
60190	32.60	-6.27	507	4	23	24	24	24	23	5	0	23
60190	32.53	-6.28	518	4	38	38	38	38	38	36	0	38
60191	32.33	-6.38	472	4	11	11	11	11	11	0	0	11
60191	32.37	-6.30	472	2	0	0	0	0	0	0	0	0
60191	32.37	-6.38	472	8	10	10	10	10	10	6	0	10
60191	32.36	-6.38	468	4	1	1	1	1	1	0	0	1
60191	32.37	-6.40	468	8	54	54	54	54	54	54	0	54
60195	32.68	-4.73	1515	4	11	38	38	41	40	7	0	40
60195	32.68	-4.70	1508	2	0	0	0	0	0	0	0	0
60200	32.57	-1.95	1110	2	0	0	0	0	0	0	0	0
60205	32.12	-7.88	448	24	7	7	7	7	7	0	0	7
60210	31.97	-4.42	1034	8	5	17	17	17	17	4	0	17
60210	31.97	-4.40	1034	2	0	0	0	0	0	0	0	0
60210	31.97	-4.41	0	4	0	1	1	1	1	0	0	1
60210	31.93	-4.40	1442	8	0	7	7	7	7	7	0	7
60220	31.52	-9.78	8	4	69	68	68	69	69	45	0	69
60220	31.52	-9.70	8	2	0	0	0	0	0	0	0	0
60220	31.51	-9.78	8	2	0	0	0	0	0	0	0	0
60230	31.62	-8.03	466	8	83	83	83	83	83	55	0	83
60230	31.62	-8.00	468	4	0	0	0	0	0	0	0	0
60230	31.61	-8.03	466	4	1	1	1	1	1	0	0	1
60250	30.38	-9.57	19	8	53	53	53	53	53	23	0	53
60250	30.38	-9.50	25	4	0	0	0	0	0	0	0	0
60250	30.38	-9.56	19	2	0	0	0	0	0	0	0	0
60252	30.33	-9.40	74	8	19	19	19	19	19	19	0	19
60252	30.32	-9.40	23	8	17	17	17	17	17	17	0	17
60253	30.50	-8.82	265	2	0	0	0	0	0	0	0	0
60265	30.93	-6.90	1136	8	10	44	44	46	46	7	0	46
60270	29.68	-9.73	260	2	0	0	0	0	0	0	0	0
60275	30.32	-5.87	729	2	0	0	0	0	0	0	0	0
60318	35.58	-5.40	10	2	9	10	9	10	10	2	0	10
60318	35.58	-5.32	10	2	0	0	0	0	0	0	0	0
60318	35.58	-5.33	10	8	53	53	53	53	53	52	0	53
60320	35.92	-5.30	35	2	2	2	2	2	2	0	0	2
60320	35.90	-5.32	5	4	27	27	27	27	27	0	0	27
60320	35.92	-5.35	88	2	0	0	0	0	0	0	0	0
60338	35.27	-2.93	32	6	18	18	18	18	18	0	0	18
60338	35.28	-2.90	47	4	0	0	0	0	0	0	0	0
60338	35.28	-2.95	47	4	57	57	57	57	57	13	0	57
60340	35.15	-2.92	11	8	41	41	41	41	41	38	0	41
60340	35.15	-2.91	11	2	0	0	0	0	0	0	0	0
60340	34.98	-3.02	177	6	15	15	15	15	15	15	0	15
60350	37.08	6.45	196	2	0	0	0	0	0	0	0	0
60351	36.83	5.78	2	8	15	12	12	15	15	14	0	15
60351	36.88	5.82	10	4	13	12	12	13	13	6	0	13
60351	36.80	5.88	10	8	9	9	9	9	9	9	0	9
60353	36.82	5.88	6	4	10	10	10	10	10	0	0	10
60355	36.87	6.95	9	2	5	5	5	5	5	0	0	5
60355	36.86	6.95	9	2	0	0	0	0	0	0	0	0
60355	36.93	6.95	7	8	33	33	33	33	33	31	0	33
60355	36.88	6.90	3	8	17	17	17	18	18	17	0	18
60360	36.83	7.82	4	8	77	77	77	77	77	55	0	77
60360	36.82	7.90	4	2	0	0	0	0	0	0	0	0
60360	36.82	7.82	4	2	2	2	2	2	2	0	0	2
60360	36.83	7.81	4	2	0	0	0	0	0	0	0	0
60367	36.90	8.45	10	4	13	7	7	13	13	0	0	13
60369	36.77	3.10	8	4	11	11	11	11	11	5	0	11
60374	36.82	2.95	33	1	0	0	0	0	0	0	0	0
60382	36.90	3.90	30	1	0	0	0	0	0	0	0	0
60384	36.90	4.42	45	1	0	0	0	0	0	0	0	0
60387	36.92	3.95	12	4	2	2	2	2	2	0	0	2
60388	36.60	2.18	33	2	0	0	0	0	0	0	0	0
60390	36.72	3.25	25	8	65	65	65	65	65	34	0	65
60390	36.72	3.30	23	4	0	0	0	0	0	0	0	0
60390	36.71	3.25	25	4	1	1	1	1	1	0	0	1
60390	36.68	3.22	29	8	21	21	21	21	21	21	0	21
60395	36.75	4.02	100	2	0	0	0	0	0	0	0	0
60395	36.70	4.05	195	8	18	18	18	19	19	18	0	19
60400	36.75	5.10	230	4	8	8	8	8	8	0	0	8
60402	36.75	5.05	22	4	16	16	16	16	16	0	0	16
60402	36.75	5.00	3	8	8	8	8	8	8	1	0	8
60402	36.72	5.07	2	8	54	51	51	54	54	51	0	54
60403	36.47	7.47	227	8	18	16	16	18	18	15	0	18
60405	36.50	7.72	110	4	2	3	3	2	2	0	0	2
60410	36.55	1.43	194	2	0	0	0	0	0	0	0	0
60410	36.52	1.30	59	1	0	0	0	0	0	0	0	0
60410	36.55	1.33	59	2	0	0	0	0	0	0	0	0
60410	36.50	1.33	59	4	4	4	4	4	4	0	0	4
60413	36.55	2.88	85	2	0	0	0	0	0	0	0	0
60415	36.32	3.53	748	4	0	3	3	3	3	0	0	3
60417	36.38	3.90	635	2	0	0	0	0	0	0	0	0
60417	36.38	3.88	560	4	5	5	5	5	5	0	0	5
60419	36.28	6.62	697	8	80	80	80	80	80	56	0	80
60419	36.28	6.70	702	4	0	0	0	0	0	0	0	0
60419	36.28	6.63	702	8	5	5	5	5	5	0	0	5
60419	36.28	6.61	697	4	1	1	1	1	1	0	0	1
60420	36.27	6.68	583	4	1	1	1	1	1	0	0	1
60421	35.88	7.12	889	2	0	0	0	0	0	0	0	0
60421	35.87	7.12	891	4	0	6	6	7	7	2	0	7
60423	36.28	7.95	680	2	0	0	0	0	0	0	0	0
60423	36.28	7.97	680	4	6	17	17	17	17	0	0	17
60425	36.17	1.32	102	4	20	20	20	20	20	0	0	20
60425	36.17	1.40	101	2	0	0	0	0	0	0	0	0
60425	36.16	1.31	102	2	0	0	0	0	0	0	0	0
60425	36.20	1.32	101	2	1	1	1	1	1	0	0	1
60425	36.22	1.33	143	4	40	40	40	40	40	22	0	40
60430	36.33	2.23	722	2	8	8	8	8	8	2	0	8
60430	36.33	2.30	722	2	0	0	0	0	0	0	0	0
60430	36.27	2.23	722	2	0	0	0	0	0	0	0	0
60430	36.30	2.23	715	4	53	53	53	53	53	14	0	53
60435	36.48	2.82	170	2	0	0	0	0	0	0	0	0
60437	36.27	2.75	918	2	0	0	0	0	0	0	0	0
60437	36.28	2.73	1036	4	0	18	18	18	18	0	0	18
60444	36.07	4.77	904	8	2	41	41	42	41	38	0	41
60445	36.18	5.33	1018	2	0	0	0	0	0	0	0	0
60445	36.18	5.42	1081	8	2	21	21	21	21	18	0	21
60445	36.18	5.25	1040	8	0	21	21	21	21	21	0	21
60452	35.87	-0.28	9	2	0	0	0	0	0	0	0	0
60452	35.82	-0.27	4	8	19	19	19	19	19	18	0	19
60456	35.80	0.08	210	2	0	0	0	0	0	0	0	0
60457	35.88	0.12	137	8	25	20	20	25	25	18	0	25
60457	35.88	2.12	137	4	0	0	0	0	0	0	0	0
60459	35.88	3.77	658	2	0	0	0	0	0	0	0	0
60461	35.70	-0.65	22	4	8	8	8	8	8	0	0	8
60461	35.70	-2.65	22	4	2	2	2	2	2	0	0	2
60465	35.93	2.75	637	2	0	0	0	0	0	0	0	0
60467	35.67	4.50	441	4	35	34	34	35	35	0	0	35
60468	35.55	6.18	1050	8	1	17	17	17	17	11	0	17
60468	35.58	6.20	1051	2	0	0	0	0	0	0	0	0
60468	35.58	6.18	1051	2	3	3	3	3	3	0	0	3
60468	35.75	6.32	826	8	0	7	7	7	7	7	0	7
60471	35.33	5.33	461	4	2	2	2	2	2	0	0	2
60475	35.43	8.13	816	4	7	7	7	7	7	0	0	7
60475	35.48	8.13	813	8	0	19	19	19	19	18	0	19
60475	35.42	8.12	823	8	0	21	21	21	21	21	0	21
60476	35.42	7.15	1116	2	0	0	0	0	0	0	0	0
60476	35.47	7.08	987	4	0	4	4	4	4	0	0	4
60478	35.25	6.35	1240	1	0	0	0	0	0	0	0	0
60481	35.48	-0.52	111	8	5	5	5	5	5	4	0	5
60482	35.87	-0.48	62	2	0	0	0	0	0	0	0	0
60485	35.77	-0.70	10	2	0	0	0	0	0	0	0	0
60485	35.77	-0.80	104	2	0	0	0	0	0	0	0	0
60486	35.73	-0.72	6	2	0	0	0	0	0	0	0	0
60490	35.62	-0.60	90	8	35	35	35	35	35	0	0	35
60490	35.61	-0.60	90	2	0	0	0	0	0	0	0	0
60490	35.63	-0.60	90	8	55	55	55	55	55	52	0	55
60492	35.73	0.55	75	2	0	0	0	0	0	0	0	0
60505	35.40	0.13	607	1	0	0	0	0	0	0	0	0
60506	35.60	0.30	474	8	30	30	30	30	30	25	0	30
60507	35.22	0.15	512	8	18	18	18	18	18	18	0	18
[truncated: 291 more rows]

## Sheet: MARS-71N-55N.025E-005E
1006	69.07	16.55	14	2	0	0	0	0	0	0	0	0
1006	69.04	15.18	14	2	0	0	0	0	0	0	0	0
1006	69.07	15.18	-9999	2	0	9	9	0	0	0	0	0
1010	69.30	16.15	14	8	56	56	56	56	56	0	0	56
1010	69.30	16.20	14	4	0	0	0	0	0	0	0	0
1010	69.30	16.12	14	2	8	8	8	8	8	0	0	8
1010	69.30	16.13	14	24	24	24	24	24	24	0	0	24
1012	69.12	17.77	6	1	0	0	0	0	0	0	0	0
1014	69.55	17.92	9	2	0	0	0	0	0	0	0	0
1014	69.23	17.90	9	2	0	0	0	0	0	0	0	0
1015	69.60	17.83	14	2	0	12	12	12	12	0	0	12
1015	69.62	17.83	14	2	0	0	0	0	0	0	0	0
1016	69.28	17.77	50	1	0	0	0	0	0	0	0	0
1017	69.35	18.08	10	2	0	0	0	0	0	0	0	0
1023	69.07	18.52	76	8	2	2	2	2	2	0	0	2
1023	69.07	18.53	79	8	41	41	41	41	41	0	0	41
1023	69.07	18.60	79	4	0	0	0	0	0	0	0	0
1023	69.05	18.55	79	8	32	32	32	32	32	0	0	32
1024	69.33	18.92	20	2	0	0	0	0	0	0	0	0
1025	69.68	18.92	10	8	71	71	71	71	71	48	0	71
1025	69.68	19.00	10	4	0	0	0	0	0	0	0	0
1025	69.68	18.91	10	4	1	1	1	1	1	0	0	1
1026	69.65	18.93	114	8	17	17	17	17	17	0	0	17
1030	69.70	19.02	14	8	2	2	2	2	2	0	0	2
1032	69.02	19.28	78	2	0	0	0	0	0	0	0	0
1033	70.25	19.50	20	4	60	61	61	60	60	0	0	60
1034	70.31	20.15	37	4	1	1	1	1	1	0	0	1
1034	70.32	20.15	37	4	28	28	28	28	28	0	0	28
1035	69.27	19.98	40	2	0	0	0	0	0	0	0	0
1035	69.25	19.98	40	4	0	23	23	23	23	0	0	23
1035	69.25	19.88	12	4	0	11	11	11	11	0	0	11
1036	69.37	20.27	5	4	0	2	2	2	2	0	0	2
1037	69.92	20.15	27	2	0	0	0	0	0	0	0	0
1040	70.05	20.98	20	2	0	0	0	0	0	0	0	0
1040	70.03	20.97	15	1	0	0	0	0	0	0	0	0
1041	69.77	21.03	4	2	0	0	0	0	0	0	0	0
1041	69.75	21.03	4	2	0	0	0	0	0	0	0	0
1041	69.73	21.02	5	2	0	0	0	0	0	0	0	0
1043	70.33	21.47	10	2	0	0	0	0	0	0	0	0
1045	69.83	21.90	5	2	0	0	0	0	0	0	0	0
1045	69.83	21.88	6	2	0	0	0	0	0	0	0	0
1046	69.78	20.97	6	4	8	8	8	8	8	0	0	8
1047	69.02	23.07	330	6	35	35	35	35	35	0	0	35
1047	69.00	23.03	308	6	28	28	28	28	28	0	0	28
1049	69.98	23.38	3	2	1	1	1	1	1	0	0	1
1049	69.98	23.35	3	2	1	1	1	1	0	0	0	0
1049	69.98	23.37	3	4	59	59	59	59	59	0	0	59
1051	69.58	23.53	374	2	0	0	0	0	0	0	0	0
1052	70.67	23.67	81	2	0	0	0	0	0	0	0	0
1053	70.68	23.68	70	2	11	11	11	10	10	0	0	10
1053	70.68	23.67	72	8	15	15	15	15	15	0	0	15
1057	69.37	24.43	285	2	0	0	0	0	0	0	0	0
1058	69.57	23.53	381	2	0	0	0	0	0	0	0	0
1059	70.07	24.98	8	6	59	59	59	59	59	0	0	59
1102	65.20	11.00	23	8	56	56	56	56	56	0	0	56
1103	65.10	11.70	50	4	0	33	33	32	32	0	0	32
1105	67.42	11.88	18	8	19	19	19	19	19	0	0	19
1105	67.42	11.90	18	4	0	0	0	0	0	0	0	0
1105	67.41	11.88	21	2	0	0	0	0	0	0	0	0
1106	67.50	12.06	10	2	0	0	0	0	0	0	0	0
1106	67.50	12.07	11	4	9	9	9	9	9	0	0	9
1106	67.50	12.08	11	4	33	33	33	33	33	0	0	33
1107	67.52	12.10	4	1	0	0	0	0	0	0	0	0
1108	65.70	11.85	2	2	0	0	0	0	0	0	0	0
1109	65.87	12.18	6	2	0	0	0	0	0	0	0	0
1110	66.00	11.68	33	6	0	13	13	13	13	0	0	13
1111	65.47	12.22	5	8	11	11	11	11	11	0	0	11
1113	66.80	13.98	39	1	0	0	0	0	0	0	0	0
1115	66.77	12.48	19	6	59	59	59	59	59	0	0	58
1115	66.77	12.50	19	4	0	0	0	0	0	0	0	0
1115	66.75	12.48	13	6	10	10	10	10	10	0	0	10
1116	65.97	12.47	17	2	0	0	0	0	0	0	0	0
1121	66.37	12.65	7	2	0	2	2	2	2	0	0	2
1121	66.40	12.62	10	6	0	25	25	25	25	0	0	25
1121	66.37	12.62	10	6	0	16	16	16	16	0	0	16
1122	65.80	13.13	70	2	0	0	0	0	0	0	0	0
1122	65.78	13.22	73	1	0	0	0	0	0	0	0	0
1124	64.17	12.47	195	2	0	0	0	0	0	0	0	0
1131	67.88	13.05	32	2	6	6	6	5	5	0	0	5
1134	65.18	13.42	339	2	0	0	0	0	0	0	0	0
1137	66.93	13.45	12	2	0	0	0	0	0	0	0	0
1138	67.30	13.50	14	6	0	25	25	25	25	0	0	25
1139	67.68	12.68	11	1	0	0	0	0	0	0	0	0
1141	68.15	13.62	26	2	0	0	0	0	0	0	0	0
1144	67.67	13.90	24	4	0	11	11	11	11	0	0	11
1145	68.35	13.97	15	2	0	0	0	0	0	0	0	0
1146	67.40	13.90	14	2	0	0	0	0	0	0	0	0
1147	65.52	14.02	265	2	0	0	0	0	0	0	0	0
1147	65.75	14.18	406	2	0	0	0	0	0	0	0	0
1149	66.27	13.98	33	4	33	33	33	33	33	0	0	33
1149	66.33	14.10	42	4	7	7	7	7	7	0	0	7
1150	65.68	14.17	385	2	0	0	0	0	0	0	0	0
1150	66.50	14.95	251	1	0	0	0	0	0	0	0	0
1151	66.37	14.32	70	1	0	0	0	0	0	0	0	0
1151	66.37	14.30	70	2	0	0	0	0	0	0	0	0
1152	67.27	14.37	10	8	62	62	62	62	62	47	0	62
1152	67.28	14.42	13	8	43	43	43	43	42	0	0	42
1152	67.28	14.50	12	4	0	0	0	0	0	0	0	0
1152	67.25	14.40	8	4	1	1	1	1	1	0	0	1
1152	67.25	14.37	20	8	1	1	1	1	1	1	0	1
1152	67.28	14.45	31	20	0	0	0	0	0	0	0	0
1154	68.58	14.30	50	2	0	12	12	12	12	0	0	12
1155	68.63	14.47	11	2	2	2	2	2	2	0	0	2
1160	68.15	14.65	11	8	25	63	63	64	62	50	0	62
1160	68.15	14.70	11	2	0	0	0	0	0	0	0	0
1161	68.25	14.67	9	2	0	0	0	0	0	0	0	0
1162	68.58	15.02	3	2	0	0	0	0	0	0	0	0
1163	66.50	15.25	549	2	0	0	0	0	0	0	0	0
1163	66.50	15.23	549	2	0	0	0	0	0	0	0	0
1165	67.83	14.78	6	2	0	0	0	0	0	0	0	0
1167	68.70	15.45	3	2	0	0	0	0	0	0	0	0
1167	68.70	15.41	3	8	0	0	0	0	0	0	0	0
1167	68.70	15.42	3	8	50	50	50	50	50	0	0	50
1168	68.65	15.28	23	2	0	0	0	0	0	0	0	0
1169	66.97	15.32	26	2	0	0	0	0	0	0	0	0
1169	66.97	15.30	26	2	0	0	0	0	0	0	0	0
1169	66.85	15.31	81	2	0	0	0	0	0	0	0	0
1169	66.85	15.32	81	2	0	0	0	0	0	0	0	0
1170	67.25	15.37	165	2	0	0	0	0	0	0	0	0
1170	67.23	15.32	167	2	0	0	0	0	0	0	0	0
1172	68.00	15.62	50	2	0	0	0	0	0	0	0	0
1173	68.32	15.65	20	2	2	2	2	2	2	0	0	2
1176	68.57	16.27	25	2	0	0	0	0	0	0	0	0
1180	68.80	16.53	45	2	0	0	0	0	0	0	0	0
1182	68.58	16.58	7	2	0	0	0	0	0	0	0	0
1183	68.52	16.68	26	1	0	0	0	0	0	0	0	0
1184	68.95	16.68	45	2	0	0	0	0	0	0	0	0
1184	68.93	16.68	45	4	0	0	0	0	0	0	0	0
1189	68.48	16.88	15	2	0	0	0	0	0	0	0	0
1191	68.28	17.32	6	2	0	0	0	0	0	0	0	0
1193	68.43	17.40	30	2	0	0	0	0	0	0	0	0
1194	68.47	17.50	32	2	2	2	2	2	2	0	0	2
1196	68.75	17.82	20	2	0	0	0	0	0	0	0	0
1196	68.73	17.80	22	2	0	0	0	0	0	0	0	0
1198	68.78	19.70	204	2	0	0	0	0	0	0	0	0
1199	68.75	23.55	382	2	0	0	0	0	0	0	0	0
1199	68.75	23.38	382	2	0	0	0	0	0	0	0	0
1199	68.75	23.53	382	4	0	43	43	43	43	0	0	43
1203	62.03	5.00	38	2	0	0	0	0	0	0	0	0
1205	62.33	5.27	39	8	57	56	56	56	56	49	0	56
1205	62.33	5.30	39	2	0	0	0	0	0	0	0	0
1205	62.33	5.26	41	4	1	1	1	1	1	0	0	1
1207	62.10	5.58	41	2	0	0	0	0	0	0	0	0
1209	62.18	6.07	74	2	0	0	0	0	0	0	0	0
1210	62.57	6.10	22	2	0	0	0	0	0	0	0	0
1210	62.57	6.12	22	4	58	58	58	58	58	0	0	58
1212	62.87	6.55	8	4	15	15	15	15	15	0	0	15
1212	62.87	6.60	8	2	0	0	0	0	0	0	0	0
1212	62.87	6.53	13	4	41	41	41	41	41	0	0	41
1215	62.97	7.15	26	2	12	12	12	12	12	0	0	12
1215	62.98	7.12	19	4	13	13	13	13	13	0	0	13
1215	62.62	7.23	35	2	0	0	0	0	0	0	0	0
1216	62.62	7.17	49	2	0	0	0	0	0	0	0	0
1216	62.62	7.22	16	2	0	10	10	10	10	0	0	10
1217	62.75	7.27	3	1	0	0	0	0	0	0	0	0
1218	62.23	7.43	8	2	8	8	8	8	8	0	0	8
1218	62.23	7.42	30	4	59	59	59	59	59	0	0	59
1220	62.47	7.77	1294	1	0	0	0	0	0	0	0	0
1222	63.12	7.75	48	2	0	1	1	1	0	0	0	0
1223	63.12	7.85	62	2	0	0	0	0	0	0	0	0
1223	63.12	7.83	62	2	0	0	0	0	0	0	0	0
1224	63.47	7.75	13	6	26	26	26	26	26	0	0	26
1225	63.43	8.08	27	2	0	0	0	0	0	0	0	0
1225	63.42	8.07	32	2	0	0	0	0	0	0	0	0
1227	62.85	8.30	69	4	23	23	23	23	23	0	0	23
1227	62.83	8.30	69	4	25	25	25	25	25	0	0	25
1228	63.85	8.47	28	6	41	41	41	41	40	12	0	40
1228	63.85	8.50	28	4	0	0	0	0	0	0	0	0
1228	63.85	8.45	28	6	25	25	25	25	25	23	0	25
1230	62.40	8.57	869	2	0	0	0	0	0	0	0	0
1231	62.23	8.37	621	2	0	14	14	14	14	0	0	14
1232	63.20	9.00	9	2	0	0	0	0	0	0	0	0
1235	62.07	9.13	638	6	9	9	9	9	9	0	0	9
1236	62.10	9.05	626	2	0	0	0	0	0	0	0	0
1238	62.12	9.30	974	2	4	4	4	4	4	0	0	4
1238	62.12	9.28	974	4	60	61	61	60	59	0	0	59
1240	64.18	9.42	16	2	0	0	0	0	0	0	0	0
1240	64.17	9.40	16	6	18	17	17	18	17	0	0	17
1240	64.17	9.42	16	2	9	9	9	9	9	0	0	9
1241	63.70	9.60	7	8	81	81	81	81	80	58	0	80
1241	63.70	9.70	7	4	0	0	0	0	0	0	0	0
1241	63.70	9.62	7	2	7	7	7	7	7	0	0	7
1243	63.33	9.63	310	2	0	0	0	0	0	0	0	0
1245	62.60	9.68	627	2	0	0	0	0	0	0	0	0
1245	62.80	9.68	671	2	0	0	0	0	0	0	0	0
1245	62.80	9.70	671	4	1	1	1	1	1	0	0	1
1245	62.60	9.67	606	4	20	20	20	20	20	0	0	20
1248	63.85	9.73	4	2	0	0	0	0	0	0	0	0
1252	62.83	10.02	441	2	0	0	0	0	0	0	0	0
1252	62.81	10.01	475	4	0	0	0	0	0	0	0	0
1252	62.82	10.02	475	4	0	35	35	35	35	0	0	35
1258	63.42	10.43	113	2	0	0	0	0	0	0	0	0
1258	63.42	10.50	113	1	0	0	0	0	0	0	0	0
1259	64.40	10.47	19	2	0	0	0	0	0	0	0	0
1259	64.40	10.45	21	2	5	5	5	5	5	5	0	5
1262	64.80	10.55	33	6	11	49	49	49	48	13	0	48
1262	64.80	10.60	33	2	0	0	0	0	0	0	0	0
1262	64.72	10.55	33	6	0	2	2	2	2	2	0	2
1265	62.30	10.75	485	6	18	17	17	18	17	0	0	17
1265	62.30	10.80	483	2	0	0	0	0	0	0	0	0
1265	62.30	10.85	483	4	7	7	7	7	7	0	0	7
1265	62.27	10.73	484	1	0	0	0	0	0	0	0	0
1268	62.03	10.78	485	2	0	0	0	0	0	0	0	0
1271	63.47	10.93	12	8	88	88	88	88	88	47	0	88
1271	63.47	11.00	17	4	0	0	0	0	0	0	0	0
1274	63.20	11.12	197	4	0	18	18	18	18	0	0	18
1274	63.18	11.08	181	2	0	0	0	0	0	0	0	0
1274	63.22	11.12	242	2	0	0	0	0	0	0	0	0
1277	63.80	11.20	76	2	0	0	0	0	0	0	0	0
1277	63.72	11.23	95	2	0	0	0	0	0	0	0	0
1277	64.02	11.45	80	2	0	0	0	0	0	0	0	0
1278	69.80	11.57	48	2	0	0	0	0	0	0	0	0
1278	63.80	11.57	48	2	1	1	1	1	1	0	0	1
1278	63.78	11.67	81	4	4	4	4	4	4	0	0	4
1278	63.78	11.68	83	4	23	23	23	23	20	0	0	20
1280	64.22	11.22	85	2	0	0	0	0	0	0	0	0
1280	64.25	11.20	86	2	3	3	3	4	3	0	0	3
1280	64.13	11.33	118	4	11	11	11	11	8	0	0	8
1288	62.58	11.35	626	2	8	8	8	8	8	0	0	8
1288	62.57	11.38	628	6	51	51	51	51	51	0	0	51
1290	64.47	11.58	2	2	0	0	0	0	0	0	0	0
1292	63.43	11.70	115	2	0	0	0	0	0	0	0	0
1292	63.45	11.70	116	2	0	0	0	0	0	0	0	0
1292	63.42	11.75	240	2	0	0	0	0	0	0	0	0
1292	63.42	11.77	240	2	0	0	0	0	0	0	0	0
1293	63.42	11.73	171	2	0	0	0	0	0	0	0	0
1294	62.90	11.88	629	2	0	0	0	0	0	0	0	0
1295	64.60	12.27	21	2	0	0	0	0	0	0	0	0
1295	64.58	12.53	119	2	0	0	0	0	0	0	0	0
1295	64.55	12.15	27	4	8	9	9	9	9	0	0	9
1296	64.25	12.42	127	2	0	0	0	0	0	0	0	0
1298	64.45	13.72	462	2	0	0	0	0	0	0	0	0
1298	64.47	13.62	403	2	0	0	0	0	0	0	0	0
1310	61.58	5.03	9	2	0	0	0	0	0	0	0	0
1311	60.30	5.22	50	8	40	40	40	40	39	0	0	39
1311	60.28	5.30	50	4	0	0	0	0	0	0	0	0
1311	60.28	5.22	50	2	3	3	3	3	3	0	0	3
1311	60.28	5.23	50	8	29	28	28	29	29	0	0	29
1316	60.40	5.32	40	2	0	0	0	0	0	0	0	0
1316	60.40	5.40	40	2	0	0	0	0	0	0	0	0
1317	60.38	5.33	39	8	75	75	75	75	75	0	0	75
1318	61.78	6.18	51	2	0	0	0	0	0	0	0	0
1319	61.03	5.38	39	2	0	0	0	0	0	0	0	0
1320	61.83	6.12	60	2	0	0	0	0	0	0	0	0
1321	61.88	5.65	33	2	0	0	0	0	0	0	0	0
1321	61.90	6.55	208	1	0	0	0	0	0	0	0	0
1322	61.47	5.85	43	2	0	0	0	0	0	0	0	0
1322	61.45	5.90	11	2	0	0	0	0	0	0	0	0
1322	61.47	5.92	64	2	0	0	0	0	0	0	0	0
1325	60.83	5.93	104	2	0	2	2	2	2	0	0	2
1325	60.83	5.95	114	4	0	43	43	43	43	0	0	43
1327	60.38	5.97	452	2	0	0	0	0	0	0	0	0
1328	60.40	5.92	408	2	0	0	0	0	0	0	0	0
1329	60.35	6.27	50	2	0	0	0	0	0	0	0	0
1330	60.22	5.98	4	2	0	0	0	0	0	0	0	0
1336	60.65	6.50	125	2	5	5	5	5	5	0	0	5
1337	60.63	6.43	55	2	0	0	0	0	0	0	0	0
1339	61.17	6.65	53	2	0	0	0	0	0	0	0	0
1339	61.17	7.13	53	2	0	0	0	0	0	0	0	0
1341	60.47	6.87	115	2	12	12	12	12	12	0	0	12
1342	60.32	6.67	12	2	0	0	0	0	0	0	0	0
1342	60.32	6.65	12	2	0	0	0	0	0	0	0	0
1344	60.68	6.75	560	2	0	0	0	0	0	0	0	0
1344	60.70	6.95	695	2	0	0	0	0	0	0	0	0
1345	61.87	6.75	78	2	0	0	0	0	0	0	0	0
1347	61.15	7.13	497	1	0	0	0	0	0	0	0	0
1350	60.60	7.53	1208	2	0	0	0	0	0	0	0	0
1351	60.60	7.52	1224	2	0	7	7	7	7	0	0	7
1351	60.60	7.50	1224	2	0	3	3	3	3	0	0	3
1352	60.37	7.50	1255	2	0	0	0	0	0	0	0	0
1352	60.18	7.48	1250	1	0	0	0	0	0	0	0	0
1355	61.07	7.52	36	2	0	0	0	0	0	0	0	0
1356	60.43	7.82	1170	2	0	0	0	0	0	0	0	0
1357	61.50	7.70	27	2	0	0	0	0	0	0	0	0
1359	60.52	7.87	988	2	0	0	0	0	0	0	0	0
1359	60.53	8.20	773	2	0	0	0	0	0	0	0	0
1360	61.90	7.87	710	2	18	18	18	18	17	0	0	17
1360	61.90	7.90	664	4	14	15	15	15	15	0	0	15
1361	61.52	7.90	2062	8	12	15	15	15	15	0	0	15
1363	61.20	8.17	1012	2	0	0	0	0	0	0	0	0
1364	60.52	8.22	810	4	0	34	34	35	35	0	0	35
1365	61.72	8.33	594	2	0	0	0	0	0	0	0	0
1365	58.27	7.33	340	2	0	0	0	0	0	0	0	0
1365	61.18	8.23	910	1	0	0	0	0	0	0	0	0
1366	61.57	8.00	1413	4	18	18	18	18	18	0	0	18
1367	61.23	8.93	828	2	0	0	0	0	0	0	0	0
1367	60.98	9.23	-9999	8	54	54	54	54	54	0	0	54
1368	61.00	9.30	822	2	0	0	0	0	0	0	0	0
1369	60.92	9.28	639	2	0	0	0	0	0	0	0	0
1370	61.52	9.38	865	2	0	0	0	0	0	0	0	0
1371	61.12	9.07	526	2	0	0	0	0	0	0	0	0
1372	60.57	9.13	165	2	9	9	9	9	9	0	0	9
1373	61.87	9.10	371	2	0	0	0	0	0	0	0	0
1374	60.93	10.13	495	2	0	0	0	0	0	0	0	0
1374	60.93	10.12	485	2	0	0	0	0	0	0	0	0
1374	60.93	10.03	550	2	0	0	0	0	0	0	0	0
1375	61.58	9.78	245	2	0	0	0	0	0	0	0	0
1375	61.48	9.97	1028	2	0	0	0	0	0	0	0	0
1376	60.78	10.20	160	1	0	0	0	0	0	0	0	0
1377	61.13	10.50	482	2	0	0	0	0	0	0	0	0
1378	61.08	10.48	271	8	8	8	8	8	8	0	0	8
1378	61.10	10.48	243	6	12	14	14	14	14	0	0	14
1378	61.10	10.47	239	2	0	0	0	0	0	0	0	0
1379	61.88	10.15	738	2	0	6	6	6	6	0	0	6
1380	61.17	9.97	816	2	0	0	0	0	0	0	0	0
1380	61.65	10.12	940	2	0	24	24	24	24	0	2	24
1382	60.77	10.82	128	6	17	17	17	17	17	0	0	17
1382	60.77	10.90	128	2	0	0	0	0	0	0	0	0
1382	60.77	10.80	131	6	2	2	2	2	2	0	0	2
1383	61.42	11.08	255	2	0	0	0	0	0	0	0	0
1383	61.40	11.15	255	2	0	0	0	0	0	0	0	0
1384	60.20	11.08	202	8	67	67	67	67	66	47	0	66
1384	60.20	11.10	204	4	1	1	1	1	1	0	0	1
1389	61.15	11.45	240	2	0	0	0	0	0	0	0	0
1389	61.17	11.45	240	6	13	45	45	45	43	0	0	43
1391	60.62	12.02	183	2	0	0	0	0	0	0	0	0
1393	61.88	12.05	675	2	0	0	0	0	0	0	0	0
1397	61.33	12.25	356	2	0	0	0	0	0	0	0	0
1397	61.32	12.27	360	2	0	0	0	0	0	0	0	0
1406	59.90	5.07	15	2	6	6	6	6	6	0	0	6
1406	59.92	5.07	16	4	45	45	45	45	45	0	0	45
1408	59.35	5.22	24	2	0	0	0	0	0	0	0	0
1411	58.83	5.52	12	2	0	0	0	0	0	0	0	0
1411	59.07	5.42	22	8	8	8	8	8	8	8	0	8
1412	58.65	5.57	24	2	0	0	0	0	0	0	0	0
1412	58.65	5.55	26	2	10	10	10	10	10	0	0	10
1415	58.88	5.63	8	8	62	62	62	62	62	32	0	62
1415	58.88	5.70	8	2	0	0	0	0	0	0	0	0
1415	58.86	5.66	33	4	1	1	1	1	1	0	0	1
1417	59.48	5.77	63	2	0	0	0	0	0	0	0	0
1417	59.48	5.75	65	2	0	0	0	0	0	0	0	0
1418	59.85	5.77	64	2	0	0	0	0	0	0	0	0
1423	59.18	6.07	1	2	0	0	0	0	0	0	0	0
1423	59.17	6.08	50	1	0	0	0	0	0	0	0	0
1423	59.17	6.05	50	2	0	0	0	0	0	0	0	0
1424	59.65	6.37	5	4	65	56	56	66	65	7	0	65
1425	58.55	6.37	196	2	0	0	0	0	0	0	0	0
1425	58.55	6.35	200	2	0	0	0	0	0	0	0	0
1425	58.52	6.52	201	2	0	0	0	0	0	0	0	0
1427	58.10	6.57	13	8	26	26	26	26	26	1	0	26
1427	58.10	6.60	13	4	0	0	0	0	0	0	0	0
1427	58.12	6.57	14	6	59	59	59	59	59	55	0	59
1428	58.10	6.63	8	2	0	0	0	0	0	0	0	0
1430	58.67	6.72	55	2	0	0	0	0	0	0	0	0
1432	58.88	6.85	500	2	0	0	0	0	0	0	0	0
1433	59.83	7.00	1079	2	0	0	0	0	0	0	0	0
1433	59.83	6.98	1082	2	0	1	1	1	1	0	0	1
1434	59.77	7.37	822	2	0	0	0	0	0	0	0	0
1435	59.82	7.22	1019	2	0	3	3	3	3	0	0	3
1436	57.98	7.05	13	2	4	30	30	31	31	0	0	31
1439	58.25	7.33	247	2	0	0	0	0	0	0	0	0
1439	58.25	7.32	260	2	0	0	0	0	0	0	0	0
1439	61.20	8.23	864	2	0	0	0	0	0	0	0	0
1440	59.10	7.50	443	2	0	0	0	0	0	0	0	0
1441	59.55	7.37	765	2	0	0	0	0	0	0	0	0
1441	59.58	7.38	836	1	0	0	0	0	0	0	0	0
1442	58.67	7.80	212	6	61	61	61	61	61	0	0	61
1445	59.45	8.00	77	4	22	22	22	22	20	0	0	20
1445	59.37	8.05	401	8	12	12	12	12	12	0	0	12
1446	59.63	8.27	800	2	0	0	0	0	0	0	0	0
1446	59.57	8.20	714	2	0	0	0	0	0	0	0	0
1448	58.07	8.05	8	8	52	51	51	52	52	43	0	52
1450	59.85	8.07	948	2	0	0	0	0	0	0	0	0
1450	59.83	8.18	977	2	0	0	0	0	0	0	0	0
1450	59.85	8.18	977	1	0	0	0	0	0	0	0	0
1452	58.20	8.08	12	4	65	65	65	65	65	11	0	65
1455	59.03	8.52	252	2	31	30	30	31	30	0	0	30
1459	58.65	8.63	160	2	0	0	0	0	0	0	0	0
1461	59.85	8.67	1828	2	0	0	0	0	0	0	0	0
1465	58.40	8.80	12	6	70	70	70	70	70	0	0	70
1467	58.63	9.15	4	4	48	48	48	48	48	0	0	48
1468	60.18	12.00	148	1	0	0	0	0	0	0	0	0
1469	60.17	10.25	140	1	0	0	0	0	0	0	0	0
1470	59.38	9.18	24	4	20	20	20	20	20	0	0	20
1470	59.38	9.20	93	1	0	0	0	0	0	0	0	0
1471	60.05	9.15	275	2	0	0	0	0	0	0	0	0
1473	59.62	9.63	173	2	0	0	0	0	0	0	0	0
1474	59.90	9.53	290	2	25	25	25	25	25	0	0	25
1475	59.18	9.57	14	1	0	0	0	0	0	0	0	0
1476	58.87	9.60	15	2	0	0	0	0	0	0	0	0
1476	58.85	9.55	5	1	0	0	0	0	0	0	0	0
1477	59.67	9.65	171	6	41	41	41	41	41	0	0	41
1478	58.98	9.77	6	2	0	0	0	0	0	0	0	0
1480	59.75	10.13	8	1	0	0	0	0	0	0	0	0
1481	59.32	10.52	3	4	0	5	5	5	5	0	0	5
1482	59.03	10.53	6	8	70	70	70	70	70	47	0	70
1482	59.03	10.60	6	4	0	0	0	0	0	0	0	0
1483	59.18	10.27	87	2	0	0	0	0	0	0	0	0
1483	59.20	10.27	88	2	0	0	0	0	0	0	0	0
1484	59.43	10.60	12	2	0	0	0	0	0	0	0	0
1486	59.85	10.43	163	2	0	0	0	0	0	0	0	0
1488	59.90	10.63	19	8	7	7	7	7	7	5	0	7
1488	59.88	10.62	19	8	13	13	13	13	13	0	0	13
1488	59.90	10.70	16	4	0	0	0	0	0	0	0	0
1488	59.90	10.62	16	8	36	36	36	36	36	32	0	36
1490	59.98	10.68	512	2	0	0	0	0	0	0	0	0
1490	59.98	10.67	513	2	0	0	0	0	0	0	0	0
1492	59.95	10.72	96	8	28	28	28	28	28	1	0	28
1492	59.93	10.73	96	1	0	0	0	0	0	0	0	0
1493	59.28	11.12	57	2	0	0	0	0	0	0	0	0
1494	59.38	10.78	53	8	64	63	63	64	64	4	0	64
1494	58.98	11.53	54	4	2	2	2	2	2	0	0	2
1495	59.15	10.83	10	1	0	0	0	0	0	0	0	0
1496	59.72	11.45	139	2	0	0	0	0	0	0	0	0
1496	59.80	11.47	139	2	0	0	0	0	0	0	0	0
1496	59.82	11.48	154	2	0	0	0	0	0	0	0	0
1497	59.00	11.55	189	2	0	0	0	0	0	0	0	0
1497	59.00	11.53	157	2	0	0	0	0	0	0	0	0
1498	59.98	12.13	150	2	0	0	0	0	0	0	0	0
1498	59.97	12.22	154	2	0	0	0	0	0	0	0	0
1500	59.38	11.38	100	1	0	0	0	0	0	0	0	0
2012	67.73	17.47	523	8	32	32	32	32	32	0	0	32
2022	68.35	18.82	394	2	0	0	0	0	0	0	0	0
2023	68.43	18.63	512	2	0	0	0	0	0	0	0	0
2026	67.32	18.88	385	2	0	0	0	0	0	0	0	0
2031	68.07	19.83	493	1	0	0	0	0	0	0	0	0
2032	68.22	19.72	393	6	0	29	29	29	29	0	0	29
2036	67.85	19.03	470	8	3	25	25	25	24	3	0	24
2038	67.25	20.27	453	1	0	0	0	0	0	0	0	0
2043	67.93	21.07	341	8	8	8	8	8	8	0	0	8
2043	67.90	21.07	351	8	3	3	3	3	3	0	0	3
2044	67.82	20.33	459	8	29	29	29	29	29	16	0	29
2044	67.81	20.33	452	4	1	1	1	1	1	0	0	1
2045	67.83	20.43	408	8	2	4	4	4	4	0	0	4
2048	67.13	20.67	365	2	3	3	3	3	3	0	0	3
2048	67.17	20.67	375	6	19	19	19	19	19	0	0	19
2049	67.15	20.83	310	2	0	0	0	0	0	0	0	0
2049	67.15	20.65	360	8	2	2	2	2	2	2	0	2
2050	68.43	18.13	508	8	19	19	19	19	19	0	0	19
2050	68.42	18.17	517	8	62	64	64	64	62	15	0	62
2052	66.95	17.80	337	4	0	0	0	0	0	0	0	0
2053	67.17	20.70	393	2	6	6	6	5	5	0	0	5
2057	65.55	22.20	17	4	0	0	0	0	0	0	0	0
2058	65.83	24.20	7	4	0	0	0	0	0	0	0	0
2059	64.50	14.20	318	4	0	0	0	0	0	0	0	0
2060	68.68	21.53	403	8	56	56	56	56	55	0	0	55
2060	64.48	21.60	36	4	0	0	0	0	0	0	0	0
2062	63.20	14.48	366	8	20	20	20	20	20	0	0	20
2064	67.33	22.23	240	2	0	0	0	0	0	0	0	0
2067	61.68	13.12	458	6	18	18	18	18	18	0	0	18
2068	61.80	16.57	93	6	6	6	6	6	6	0	0	6
2071	60.43	15.50	156	8	9	9	9	9	9	0	0	9
2072	60.50	14.97	178	2	0	0	0	0	0	0	0	0
2073	59.37	13.50	46	4	0	0	0	0	0	0	0	0
2076	59.90	17.60	21	4	14	14	14	14	14	0	0	14
2076	59.88	17.60	21	8	41	41	41	41	41	0	0	41
2077	59.35	18.00	15	4	0	0	0	0	0	0	0	0
2079	58.43	12.72	52	8	27	27	27	27	27	0	0	27
2079	58.43	12.70	54	8	41	41	41	41	41	0	0	41
2080	58.52	14.52	96	2	0	0	0	0	0	0	0	0
2080	58.52	14.60	96	4	0	0	0	0	0	0	0	0
2080	58.52	14.53	96	8	31	31	31	31	31	0	0	31
2080	68.45	22.50	327	8	4	4	4	4	4	0	0	4
2080	68.43	22.50	325	8	5	5	5	5	5	0	0	5
2080	68.45	22.45	330	8	16	16	16	16	16	0	0	16
2084	57.72	11.78	6	4	10	10	10	10	10	0	0	10
2084	57.72	11.80	8	4	0	0	0	0	0	0	0	0
2084	68.05	21.98	360	1	0	0	0	0	0	0	0	0
2084	68.05	22.00	360	2	0	0	0	0	0	0	0	0
2085	57.72	13.20	259	4	0	0	0	0	0	0	0	0
2086	57.12	12.25	22	4	3	3	3	3	3	0	0	3
2086	67.77	22.35	325	8	30	40	40	40	40	0	0	40
2087	57.77	14.10	226	4	0	0	0	0	0	0	0	0
2088	67.08	22.23	240	2	0	0	0	0	0	0	0	0
2090	57.65	18.33	47	8	7	7	7	7	7	0	0	7
2090	57.67	18.40	51	4	0	0	0	0	0	0	0	0
2090	57.67	18.35	51	8	41	41	41	41	41	16	0	41
2091	56.30	12.50	72	4	0	0	0	0	0	0	0	0
2092	56.68	12.82	25	2	2	2	2	2	2	0	0	2
2092	56.68	12.83	30	2	1	1	1	1	1	0	0	1
2092	67.95	23.47	240	2	0	0	0	0	0	0	0	0
2094	55.95	15.70	6	4	8	8	8	8	8	0	0	8
2094	56.03	15.80	1	8	37	37	37	37	37	0	3	37
2096	67.20	23.42	180	8	18	18	18	18	17	6	0	17
2096	56.92	18.20	39	4	0	0	0	0	0	0	0	0
2096	67.22	23.40	168	8	44	44	44	44	44	36	0	44
2096	67.20	23.38	165	8	5	5	5	5	5	5	0	5
2097	55.60	13.07	15	2	0	0	0	0	0	0	0	0
2100	68.68	21.60	403	4	0	0	0	0	0	0	0	0
2102	67.77	20.27	472	8	20	20	20	20	20	0	0	20
2103	65.78	15.07	800	4	0	1	1	1	1	0	0	1
2104	65.82	15.10	475	8	59	59	59	59	58	8	0	58
2104	66.28	22.85	54	2	0	0	0	0	0	0	0	0
2104	65.80	15.10	475	8	11	11	11	11	11	0	0	11
2104	65.82	15.08	485	8	8	8	8	8	8	0	0	8
2105	66.05	17.90	434	4	9	10	10	9	9	0	0	9
2105	66.03	17.87	430	8	8	41	41	41	41	0	0	41
2105	65.53	14.98	670	2	0	0	0	0	0	0	0	0
2108	65.07	14.80	560	8	28	31	31	31	31	0	0	31
2111	65.87	20.15	180	4	2	2	2	2	2	0	0	2
2111	65.87	20.13	180	4	18	18	13	19	19	0	0	19
2112	66.57	16.35	500	8	0	43	43	43	42	0	0	42
2112	64.58	18.70	235	4	0	0	0	0	0	0	0	0
2115	63.33	12.13	640	8	18	18	18	18	18	0	0	18
2115	63.30	12.20	640	4	0	0	0	0	0	0	0	0
2115	63.30	12.13	640	8	10	10	10	10	10	3	0	10
2116	63.05	17.75	6	4	9	9	9	9	8	0	0	8
2116	65.82	16.72	352	2	0	0	0	0	0	0	0	0
2117	63.57	19.43	9	8	14	14	14	14	14	0	0	14
2117	63.57	19.50	6	8	19	19	19	19	19	0	0	19
2118	65.23	16.00	485	2	0	0	0	0	0	0	0	0
2118	65.32	16.03	525	8	0	7	7	7	7	0	0	7
2120	66.95	17.75	337	8	52	52	52	52	50	0	0	50
2120	66.95	17.73	321	8	5	5	5	5	5	0	0	5
2120	66.88	18.02	322	8	16	16	16	16	16	0	0	16
2121	66.68	16.12	615	1	0	0	0	0	0	0	0	0
2122	66.53	17.67	454	2	0	0	0	0	0	0	0	0
2123	61.38	15.80	189	8	20	20	20	20	20	0	0	20
2124	60.88	17.92	22	2	0	0	0	0	0	0	0	0
2124	66.05	17.87	430	8	0	4	4	4	4	0	0	4
2124	66.05	17.83	432	1	0	0	0	0	0	0	0	0
2126	60.68	13.80	308	4	0	0	0	0	0	0	0	0
2127	65.07	17.17	327	2	0	0	0	0	0	0	0	0
2128	65.02	17.68	278	8	37	37	37	37	37	0	0	37
2128	60.67	17.17	15	8	0	1	1	1	1	1	0	1
2128	65.01	17.68	281	4	1	1	1	1	1	0	0	1
2128	64.97	17.70	281	8	18	18	18	18	18	0	0	18
2128	65.00	17.72	273	8	5	5	5	5	5	0	0	5
2128	65.00	17.70	283	8	9	9	9	9	9	0	0	9
2130	60.73	17.57	7	2	9	9	9	9	9	0	0	9
2130	66.48	16.43	725	1	0	0	0	0	0	0	0	0
2135	59.67	17.93	37	8	19	19	19	19	19	0	0	19
2135	59.65	17.95	38	8	31	31	31	31	31	30	0	31
2136	65.50	18.95	454	2	0	0	0	0	0	0	0	0
2141	66.32	19.22	582	2	0	0	0	0	0	0	0	0
2142	66.60	19.83	268	2	16	16	16	16	15	0	0	15
2142	66.00	19.83	256	8	2	2	2	2	2	0	0	2
2142	66.63	19.65	261	8	33	33	33	33	33	0	0	33
2142	66.63	19.63	266	6	4	4	4	4	4	0	0	4
2143	58.93	11.20	18	8	12	12	12	12	12	0	0	12
2143	66.22	19.13	570	4	0	0	0	0	0	0	0	0
2144	65.90	19.10	342	8	46	46	46	46	45	0	0	45
2144	65.98	18.93	374	6	4	4	4	4	4	0	0	4
2145	66.15	19.63	436	2	0	0	0	0	0	0	0	0
2146	66.50	19.68	324	1	0	0	0	0	0	0	0	0
2147	58.40	15.53	93	4	17	17	17	17	17	0	0	17
2147	58.40	15.52	93	8	38	38	38	38	38	0	0	38
2148	58.62	16.20	27	4	0	0	0	0	0	0	0	0
2151	66.48	20.17	275	8	0	0	0	0	0	0	0	0
2152	66.30	20.42	174	2	0	0	0	0	0	0	0	0
2154	57.77	14.08	226	8	60	60	60	60	60	21	0	60
2154	57.77	14.18	99	2	0	0	0	0	0	0	0	0
2154	65.88	20.15	183	4	11	11	11	11	11	0	0	11
2155	57.28	14.13	172	8	11	11	11	11	11	0	0	11
2155	57.30	14.20	169	4	0	0	0	0	0	0	0	0
2155	57.30	14.13	169	8	32	32	32	32	32	0	0	32
2156	65.30	20.22	250	2	0	8	8	8	8	0	0	8
2158	65.13	20.78	190	2	0	0	0	0	0	0	0	0
2159	65.12	20.77	195	8	2	2	2	2	2	0	0	2
2160	66.75	21.08	329	2	0	0	0	0	0	0	0	0
2160	66.75	21.05	329	2	0	0	0	0	0	0	0	0
2161	56.30	12.87	20	4	8	8	8	8	8	0	0	8
2161	56.30	12.85	20	8	33	33	33	33	33	0	0	33
2163	56.08	13.22	43	2	0	0	0	0	0	0	0	0
2163	56.08	13.23	43	8	32	32	32	32	32	0	0	32
2164	66.38	21.63	261	8	40	41	41	41	41	0	0	41
2166	56.27	15.27	58	8	31	31	31	31	31	0	0	31
2166	56.27	15.28	58	8	36	36	36	36	36	0	0	36
2169	65.87	21.45	36	1	0	0	0	0	0	0	0	0
2170	56.07	16.67	24	2	0	1	1	1	0	0	0	0
2171	65.82	21.70	23	2	1	1	1	1	1	0	0	1
2172	65.68	20.97	50	2	0	0	0	0	0	0	0	0
2176	65.23	21.67	5	2	0	0	0	0	0	0	0	0
2176	65.03	21.57	3	2	0	0	0	0	0	0	0	0
2181	66.27	22.85	62	8	2	2	2	2	2	0	0	2
2182	66.33	22.80	51	2	0	0	0	0	0	0	0	0
2182	66.27	22.83	47	2	0	0	0	0	0	0	0	0
2184	66.82	22.33	229	1	0	0	0	0	0	0	0	0
2186	65.55	22.13	16	8	77	77	77	77	77	0	0	77
2188	65.32	22.37	5	6	0	2	2	2	2	0	0	2
2188	65.32	22.38	1	8	0	2	2	2	2	2	0	2
2189	65.33	22.75	24	2	0	0	0	0	0	0	0	0
2190	66.85	23.05	180	2	0	0	0	0	0	0	0	0
2191	65.70	23.10	4	1	0	0	0	0	0	0	0	0
2196	65.83	24.15	7	8	57	57	57	57	57	0	0	57
2198	65.73	23.10	8	2	0	0	0	0	0	0	0	0
2199	66.62	23.47	132	1	0	0	0	0	0	0	0	0
2200	64.05	12.95	445	6	10	32	32	32	32	0	0	32
2200	63.98	12.87	425	8	0	27	27	27	27	0	0	27
2206	63.30	12.12	644	8	56	56	56	56	56	51	0	56
2209	63.05	12.27	1035	2	0	0	0	0	0	0	0	0
2209	63.05	12.26	1035	1	0	0	0	0	0	0	0	0
2209	63.05	12.28	1030	2	0	0	0	0	0	0	0	0
2214	65.25	13.22	611	1	0	0	0	0	0	0	0	0
2215	63.43	13.08	1280	2	0	0	0	0	0	0	0	0
2216	63.32	13.87	355	1	0	0	0	0	0	0	0	0
2217	63.38	13.15	435	1	0	0	0	0	0	0	0	0
2218	63.32	13.65	400	2	0	0	0	0	0	0	0	0
2219	64.50	14.22	550	1	0	0	0	0	0	0	0	0
2221	63.83	13.50	717	8	0	2	2	2	2	2	0	2
2222	64.50	14.13	316	8	61	61	61	61	61	29	0	61
2222	64.50	14.15	322	8	5	5	5	5	5	4	0	5
2222	64.50	14.17	328	6	14	14	14	14	14	4	0	14
2223	63.97	13.72	680	4	0	0	0	0	0	0	0	0
2224	63.77	14.43	475	2	0	0	0	0	0	0	0	0
2226	63.18	14.50	376	8	40	40	40	40	40	0	0	40
2229	63.20	14.50	376	8	12	12	12	12	12	0	0	12
2230	64.57	15.92	401	8	2	2	2	2	2	0	0	2
2232	64.45	15.60	346	2	4	4	4	4	4	0	0	4
2232	64.43	15.63	346	6	19	30	30	30	30	0	0	30
2234	63.87	15.58	346	8	29	31	31	31	31	0	0	31
2236	64.27	19.63	179	2	0	0	0	0	0	0	0	0
2236	63.73	15.50	338	8	9	9	9	9	9	0	0	9
2242	64.08	16.23	241	1	0	0	0	0	0	0	0	0
2244	63.70	16.85	210	2	0	0	0	0	0	0	0	0
2244	63.70	16.87	210	8	11	16	16	16	16	0	0	16
2244	63.68	16.95	217	8	8	8	8	8	8	0	0	8
2245	64.58	16.85	349	8	2	2	2	2	2	2	0	2
2247	63.15	16.17	184	8	2	2	2	2	2	2	0	2
2248	63.90	19.72	87	2	0	0	0	0	0	0	0	0
2248	63.15	16.18	170	2	0	6	6	6	6	0	0	6
2248	63.17	16.17	220	8	20	29	29	29	29	0	0	29
2252	64.45	17.08	353	8	25	25	25	25	25	0	0	25
2254	64.17	17.37	316	8	30	30	30	30	29	6	0	29
2254	62.40	17.33	66	8	20	20	20	20	20	0	0	20
2256	64.72	17.43	575	2	0	0	0	0	0	0	0	0
2259	63.05	17.77	10	8	38	38	38	38	38	0	0	38
2260	63.13	18.25	143	1	0	0	0	0	0	0	0	0
2261	61.02	14.52	170	2	0	0	0	0	0	0	0	0
2261	64.55	18.72	211	1	0	0	0	0	0	0	0	0
2262	64.58	18.65	235	8	15	46	46	47	46	0	0	46
2264	64.08	18.42	295	2	0	0	0	0	0	0	0	0
2264	61.45	14.88	434	2	0	0	0	0	0	0	0	0
2264	61.67	14.98	440	2	0	3	3	3	3	0	0	3
2265	63.65	18.55	183	1	0	0	0	0	0	0	0	0
2266	63.47	18.07	85	2	0	0	0	0	0	0	0	0
2266	63.45	18.10	75	2	0	0	0	0	0	0	0	0
2267	63.40	18.97	103	2	0	0	0	0	0	0	0	0
2270	64.92	19.47	301	2	0	0	0	0	0	0	0	0
2271	64.93	19.38	310	1	0	0	0	0	0	0	0	0
2274	64.22	19.72	206	8	7	7	7	7	7	0	0	7
2276	60.53	18.38	5	8	2	2	2	2	2	2	0	2
2278	63.18	19.02	13	6	0	34	34	34	34	2	0	34
2279	59.87	11.97	130	2	0	0	0	0	0	0	0	0
2282	64.57	19.70	258	1	0	0	0	0	0	0	0	0
2283	63.82	20.25	10	2	0	0	0	0	0	0	0	0
2284	63.43	19.68	5	8	0	0	0	0	0	0	0	0
2286	63.80	20.28	7	8	44	44	44	44	44	16	0	44
2288	63.60	20.77	6	8	45	45	45	45	45	0	0	45
2288	63.60	20.75	6	8	1	1	1	1	1	0	0	1
2289	63.33	20.18	25	2	1	1	1	1	1	0	1	1
2289	59.38	16.47	8	2	0	0	0	0	0	0	0	0
2290	64.92	21.23	10	2	0	0	0	0	0	0	0	0
2292	64.38	21.32	105	1	0	0	0	0	0	0	0	0
2293	64.63	21.08	49	2	0	0	0	0	0	0	0	0
2296	64.48	21.58	36	8	58	58	58	58	58	0	2	58
2296	59.75	19.42	5	2	0	0	0	0	0	0	0	0
2300	62.58	12.22	780	2	0	0	0	0	0	0	0	0
2302	61.87	12.30	660	1	0	0	0	0	0	0	0	0
2303	62.73	12.73	995	1	0	0	0	0	0	0	0	0
2304	61.85	12.27	670	4	0	13	13	12	12	0	0	12
2306	61.13	12.82	455	8	0	31	31	31	31	0	0	31
2307	61.90	12.85	875	8	0	0	0	0	0	0	0	0
2307	61.88	12.85	869	1	0	0	0	0	0	0	0	0
2308	62.45	12.67	724	8	2	2	2	2	2	2	0	2
2310	58.57	13.35	128	2	0	0	0	0	0	0	0	0
2310	62.80	13.07	575	8	23	31	31	31	31	0	0	31
2311	61.08	13.23	725	1	0	0	0	0	0	0	0	0
2311	61.17	13.12	744	1	0	0	0	0	0	0	0	0
2314	62.10	13.25	610	2	0	0	0	0	0	0	0	0
2314	62.12	13.28	605	2	0	0	0	0	0	0	0	0
2316	61.68	13.13	505	8	11	11	11	11	10	0	0	10
2316	61.70	13.13	438	8	8	8	8	8	8	0	0	8
2316	61.70	13.17	438	8	24	24	24	24	24	0	0	24
2316	61.70	13.18	425	1	0	0	0	0	0	0	0	0
2318	57.48	12.70	95	2	0	0	0	0	0	0	0	0
2318	61.17	13.02	830	8	0	0	0	0	0	0	0	0
2319	62.75	13.85	467	1	0	0	0	0	0	0	0	0
2323	62.53	14.20	551	2	0	0	0	0	0	0	0	0
2324	62.03	14.37	356	8	52	51	51	52	51	34	0	51
2324	62.02	14.20	433	8	5	5	5	5	5	4	0	5
2324	62.02	14.18	433	8	18	18	18	18	18	4	0	18
2325	62.50	14.15	803	2	0	0	0	0	0	0	0	0
2326	57.30	17.97	40	2	0	0	0	0	0	0	0	0
2326	61.65	15.00	455	8	0	26	26	26	26	0	0	26
2328	61.25	14.03	250	2	0	0	0	0	0	0	0	0
2329	61.67	15.00	455	1	0	0	0	0	0	0	0	0
2330	62.75	15.10	342	2	0	0	0	0	0	0	0	0
2331	62.75	15.08	343	1	0	0	0	0	0	0	0	0
2333	56.83	13.95	140	2	0	0	0	0	0	0	0	0
2334	62.03	15.47	261	2	0	0	0	0	0	0	0	0
2336	61.38	15.83	163	8	36	36	36	36	36	0	0	36
2338	61.37	15.72	185	8	2	2	2	2	2	2	0	2
2342	62.50	16.18	75	6	0	28	28	28	28	0	0	28
2342	62.52	16.20	110	8	0	13	13	13	13	0	0	13
2342	62.52	16.18	105	8	0	18	18	18	18	0	0	18
2346	61.78	16.55	90	2	0	0	0	0	0	0	0	0
2354	62.38	17.30	80	1	0	0	0	0	0	0	0	0
2355	61.70	17.53	10	8	2	2	2	2	2	2	0	2
2361	62.63	17.95	8	2	0	0	0	0	0	0	0	0
2365	62.53	17.45	6	8	41	41	41	41	41	30	0	41
2366	62.52	17.45	7	8	15	15	15	15	15	0	0	15
2368	62.23	17.67	2	2	0	0	0	0	0	0	0	0
2372	61.70	17.52	2	2	0	0	0	0	0	0	0	0
2372	61.62	17.45	5	2	0	0	0	0	0	0	0	0
2376	61.27	17.10	31	8	55	55	55	55	55	0	0	55
2376	61.26	17.10	36	4	1	1	1	1	1	0	0	1
2382	62.62	18.05	20	2	0	0	0	0	0	0	0	0
2382	62.62	18.07	10	8	0	0	0	0	0	0	0	0
2382	62.65	18.10	10	2	0	0	0	0	0	0	0	0
2400	60.32	12.70	178	2	4	4	4	4	4	0	0	4
2400	60.33	12.68	199	6	17	17	17	17	17	0	0	17
2400	60.35	12.65	310	8	22	22	22	22	22	0	0	22
2404	59.67	12.58	75	8	45	45	45	45	45	0	0	45
2406	59.28	12.05	110	8	0	37	37	37	37	0	0	37
2407	58.48	12.48	-9999	1	0	0	0	0	0	0	0	0
2408	59.22	12.08	171	8	2	2	2	2	2	2	0	2
2409	59.05	12.70	60	2	0	0	0	0	0	0	0	0
2410	60.68	13.72	308	8	60	60	60	60	59	33	0	59
2410	60.68	13.71	308	4	1	1	1	1	1	0	0	1
2410	60.70	13.68	300	8	5	5	5	5	5	5	0	5
2410	60.68	13.70	308	8	18	18	18	18	18	14	0	18
2411	59.67	12.63	67	1	0	0	0	0	0	0	0	0
2412	60.15	13.80	198	8	12	43	43	43	43	0	0	43
2413	60.63	12.88	525	1	0	0	0	0	0	0	0	0
2413	60.75	12.77	205	1	0	0	0	0	0	0	0	0
2416	59.62	13.75	93	2	0	0	0	0	0	0	0	0
2417	58.77	13.25	55	8	1	1	1	1	1	0	0	1
2417	58.70	13.12	53	2	0	0	0	0	0	0	0	0
2417	58.75	13.15	50	1	0	0	0	0	0	0	0	0
2418	59.37	13.47	47	8	50	50	50	50	50	34	0	50
2418	59.45	13.33	100	2	0	0	0	0	0	0	0	0
2420	60.52	14.95	193	2	0	0	0	0	0	0	0	0
2422	59.62	14.18	130	2	0	0	0	0	0	0	0	0
2423	59.87	13.12	109	1	0	0	0	0	0	0	0	0
2424	59.95	14.95	210	8	4	4	4	4	4	0	0	4
2427	59.32	14.57	153	2	0	0	0	0	0	0	0	0
2428	59.10	14.37	105	8	0	31	31	31	31	0	0	31
2429	59.67	14.18	133	1	0	0	0	0	0	0	0	0
2430	60.92	15.12	227	2	0	0	0	0	0	0	0	0
2432	59.23	15.05	60	8	2	2	2	2	2	2	0	2
2433	60.62	15.67	157	2	0	0	0	0	0	0	0	0
2434	59.82	15.55	155	2	0	0	0	0	0	0	0	0
2435	60.43	15.52	145	8	2	2	2	2	2	0	0	2
2436	59.27	15.33	36	4	13	13	13	13	13	0	0	13
2437	59.40	15.92	18	2	0	0	0	0	0	0	0	0
2438	59.07	15.83	60	2	0	0	0	0	0	0	0	0
2439	59.53	15.58	52	2	0	0	0	0	0	0	0	0
2442	60.83	16.05	349	2	0	0	0	0	0	0	0	0
2443	59.65	17.12	26	8	4	4	4	4	4	0	0	4
2444	60.17	16.32	78	8	31	31	31	31	31	0	0	31
2446	59.58	16.63	19	8	44	44	44	44	44	0	0	44
2448	59.20	16.92	33	2	0	0	0	0	0	0	0	0
2449	59.35	16.72	42	2	0	0	0	0	0	0	0	0
2452	59.30	14.90	219	1	0	0	0	0	0	0	0	0
2453	60.72	17.17	16	6	0	2	2	2	2	2	0	2
2453	60.65	17.13	32	2	0	0	0	0	0	0	0	0
2453	60.65	17.17	16	2	0	0	0	0	0	0	0	0
2454	60.75	17.35	4	2	0	0	0	0	0	0	0	0
2456	60.23	17.90	39	8	8	8	8	8	8	0	0	8
2456	60.20	17.92	41	2	0	0	0	0	0	0	0	0
2462	59.87	17.63	13	4	0	0	0	0	0	0	0	0
2464	59.35	17.95	10	8	38	38	38	38	38	25	0	38
2468	60.38	15.13	493	1	0	0	0	0	0	0	0	0
2469	59.18	17.92	69	2	0	0	0	0	0	0	0	0
2471	60.50	18.87	23	6	13	13	13	13	13	0	3	13
2473	60.28	18.92	40	2	0	0	0	0	0	0	0	0
2474	60.17	18.75	14	8	46	46	46	46	46	30	0	46
2476	59.05	16.40	20	8	2	2	2	2	2	2	0	2
2480	59.75	18.72	25	2	0	0	0	0	0	0	0	0
2480	59.85	18.73	10	2	0	0	0	0	0	0	0	0
2483	59.35	18.07	30	2	0	0	0	0	0	0	0	0
2485	59.33	18.05	52	6	0	0	0	1	1	1	0	1
2485	59.57	18.10	44	2	0	0	0	0	0	0	0	0
2486	59.37	17.52	6	1	0	0	0	0	0	0	0	0
2487	59.30	18.70	13	2	0	0	0	0	0	0	0	0
2489	59.07	18.12	9	2	4	4	4	4	4	0	0	4
2495	59.55	20.02	0	2	0	0	0	0	0	0	0	0
2496	59.45	19.50	12	8	73	74	74	74	73	0	1	73
2499	59.15	19.13	25	8	0	0	0	0	0	0	0	0
2500	58.90	11.00	11	8	4	4	4	4	4	0	0	4
2500	58.90	11.02	4	8	4	4	4	4	4	0	0	4
2501	58.58	11.07	21	2	0	0	0	0	0	0	0	0
2502	58.90	12.03	152	2	0	0	0	0	0	0	0	0
2504	58.57	11.55	70	6	0	20	20	20	19	0	0	19
2505	58.10	11.33	16	8	0	0	0	0	0	0	0	0
2506	58.37	11.22	20	2	0	0	0	0	0	0	0	0
2508	58.10	11.35	15	6	7	35	35	35	35	0	4	35
2510	58.22	11.93	70	2	0	0	0	0	0	0	0	0
2511	57.22	11.83	-9999	1	0	0	0	0	0	0	0	0
2512	57.78	11.88	17	8	48	48	48	48	48	0	0	48
2513	57.70	12.00	5	8	0	3	3	3	3	3	0	3
2513	57.72	12.00	2	1	0	0	0	0	0	0	0	0
2515	58.18	12.15	20	1	0	0	0	0	0	0	0	0
2516	57.63	11.62	19	8	0	3	3	3	3	0	0	3
2516	57.63	11.60	13	1	0	0	0	0	0	0	0	0
2517	57.60	11.63	26	2	0	0	0	0	0	0	0	0
2518	62.22	17.75	17	8	0	0	0	0	0	0	0	0
2518	57.30	11.90	3	8	38	41	41	41	40	2	2	40
2519	57.27	12.12	12	1	0	0	0	0	0	0	0	0
2521	58.63	12.43	65	2	0	0	0	0	0	0	0	0
2523	58.32	12.33	43	2	0	0	0	0	0	0	0	0
2524	58.02	12.83	148	6	6	6	6	6	6	0	0	6
2524	57.93	13.07	190	8	0	32	32	32	32	0	0	32
2526	57.66	12.30	169	4	1	1	1	1	1	0	0	1
2526	57.67	12.30	169	8	32	32	32	32	32	31	0	32
2526	57.60	12.30	169	4	0	0	0	0	0	0	0	0
2530	58.90	13.25	50	8	0	30	30	30	30	0	0	30
2533	58.40	13.43	120	2	0	0	0	0	0	0	0	0
2534	58.28	13.80	182	2	0	0	0	0	0	0	0	0
2536	57.72	13.12	259	2	3	3	3	3	3	0	0	3
2536	57.78	13.17	299	8	2	2	2	2	2	2	0	2
2538	57.40	13.53	285	2	0	0	0	0	0	0	0	0
2541	58.97	14.90	144	4	14	14	14	14	14	0	0	14
2543	58.65	14.13	97	2	0	0	0	0	0	0	0	0
2544	58.51	14.53	102	4	1	1	1	1	1	0	0	1
2545	58.57	14.57	91	1	0	0	0	0	0	0	0	0
2548	58.10	14.40	110	2	0	0	0	0	0	0	0	0
2548	58.10	14.42	95	1	0	0	0	0	0	0	0	0
2550	57.75	14.08	218	1	0	0	0	0	0	0	0	0
2555	57.65	14.70	305	8	0	31	31	31	31	0	0	31
2557	57.88	15.87	91	1	0	0	0	0	0	0	0	0
2559	57.70	16.47	30	1	0	0	0	0	0	0	0	0
2560	58.80	15.12	215	2	0	0	0	0	0	0	0	0
2560	58.87	15.15	135	2	0	0	0	0	0	0	0	0
2564	58.07	15.22	153	2	0	0	0	0	0	0	0	0
2564	58.03	15.22	153	8	0	7	7	7	7	0	0	7
2564	58.07	15.23	195	8	20	23	23	23	23	0	0	23
2565	57.52	15.83	112	1	0	0	0	0	0	0	0	0
2566	57.40	15.83	101	8	47	47	47	47	47	0	0	47
2566	57.40	15.82	97	8	19	19	19	19	19	0	0	19
2568	57.07	15.97	115	2	0	0	0	0	0	0	0	0
2569	58.73	16.37	60	2	0	0	0	0	0	0	0	0
2570	58.62	16.12	27	8	41	41	41	41	41	0	0	41
2570	57.73	18.43	50	2	0	0	0	0	0	0	0	0
2571	58.58	16.25	8	2	0	0	0	0	0	0	0	0
2572	58.78	16.92	41	8	13	13	13	13	13	0	0	13
2572	58.73	16.92	42	2	0	0	0	0	0	0	0	0
2573	58.75	17.07	8	2	0	0	0	0	0	0	0	0
2574	58.58	16.15	21	8	0	0	0	0	0	0	0	0
2576	57.78	16.60	9	2	2	2	2	2	2	0	0	2
2576	57.72	16.47	35	8	31	31	31	31	31	0	0	31
2580	58.97	18.45	10	2	0	0	0	0	0	0	0	0
2581	58.95	18.27	76	2	0	0	0	0	0	0	0	0
2582	58.75	17.87	32	8	46	46	46	46	46	2	3	46
2582	55.85	13.32	89	2	0	0	0	0	0	0	0	0
2583	58.60	17.47	21	8	0	0	0	0	0	0	0	0
2584	58.40	19.20	12	8	66	66	66	66	66	0	1	66
2584	55.80	13.70	160	2	0	0	0	0	0	0	0	0
2586	58.25	17.02	7	8	55	55	55	55	55	32	3	55
2588	57.97	19.35	10	6	0	7	7	7	7	0	0	7
2588	55.52	12.92	2	2	0	0	0	0	0	0	0	0
2588	57.90	19.17	8	8	0	32	32	32	32	0	0	32
2590	57.66	18.35	47	4	1	1	1	1	1	0	0	1
2591	57.65	18.35	47	2	0	0	0	0	0	0	0	0
2592	57.37	17.10	4	8	51	51	51	51	51	2	4	51
2595	57.40	18.50	45	2	0	0	0	0	0	0	0	0
2596	57.42	18.92	5	2	0	0	0	0	0	0	0	0
2597	57.52	18.45	30	2	0	0	0	0	0	0	0	0
2598	57.43	18.98	5	2	0	0	0	0	0	0	0	0
2599	57.07	18.22	-9999	8	0	0	0	0	0	0	0	0
2600	56.93	12.37	2	2	0	0	0	0	0	0	0	0
2603	56.87	12.67	47	1	0	0	0	0	0	0	0	0
2605	56.45	12.55	10	2	0	0	0	0	0	0	0	0
2606	56.30	12.45	72	8	33	33	33	33	33	0	0	33
2609	55.45	13.72	50	1	0	0	0	0	0	0	0	0
2610	55.87	12.87	11	1	0	0	0	0	0	0	0	0
2611	56.05	12.68	5	8	1	1	1	1	1	1	0	1
2611	56.03	12.77	44	8	2	2	2	2	2	2	0	2
2614	55.60	12.85	10	2	0	0	0	0	0	0	0	0
2616	55.38	12.82	5	8	73	73	73	73	73	0	3	73
2617	55.38	13.07	-9999	2	0	0	0	0	0	0	0	0
2620	56.97	13.10	85	8	0	4	4	4	4	0	0	4
2620	56.97	13.07	85	8	19	19	19	19	19	0	0	19
2622	56.83	13.92	155	8	0	2	2	2	2	0	0	2
2622	56.83	13.97	145	8	0	23	23	23	23	0	0	23
2624	56.47	13.65	118	8	14	14	14	14	14	0	0	14
2625	55.48	14.32	5	8	2	2	2	2	2	2	0	2
2626	56.37	13.95	83	8	45	45	45	45	45	0	0	45
2626	56.37	14.00	82	6	3	3	3	3	3	0	0	3
2635	55.58	13.02	13	2	0	0	0	0	0	0	0	0
2636	55.55	13.37	72	8	33	33	33	33	33	29	0	33
2638	55.33	13.35	5	4	0	15	15	15	15	0	0	15
2639	55.43	13.83	34	4	17	17	17	17	17	3	0	17
2640	56.87	14.80	168	8	42	42	42	42	42	0	0	42
2641	56.93	14.73	186	8	1	2	2	2	2	1	0	2
2641	56.85	14.83	200	8	0	0	0	0	0	0	0	0
2650	56.02	14.85	55	8	0	32	32	32	32	0	0	32
2651	55.92	14.08	23	2	0	0	0	0	0	0	0	0
2654	55.67	14.27	112	6	13	13	13	13	13	0	0	13
2656	55.38	14.20	5	2	0	0	0	0	0	0	0	0
2662	56.52	15.62	115	2	0	0	0	0	0	0	0	0
2672	56.68	16.30	8	8	25	25	25	25	25	0	0	25
2672	56.73	16.30	16	8	32	32	32	32	32	0	0	32
2676	56.20	16.40	4	8	2	2	2	2	2	2	0	2
2680	56.92	18.15	39	8	84	84	84	84	84	57	0	84
2685	56.07	16.68	30	2	0	0	0	0	0	0	0	0
2701	69.05	20.85	1009	1	0	0	0	0	0	0	0	0
2721	63.95	22.85	6	2	0	0	0	0	0	0	0	0
2725	63.45	24.45	153	2	0	0	0	0	0	0	0	0
2735	62.33	23.55	140	1	0	0	0	0	0	0	0	0
2762	61.27	22.25	39	2	0	0	0	0	0	0	0	0
2770	61.85	24.28	153	2	0	0	0	0	0	0	0	0
2777	60.45	23.65	121	2	0	0	0	0	0	0	0	0
2800	64.62	23.90	24	1	0	0	0	0	0	0	0	0
2801	69.05	20.78	476	6	55	55	55	55	55	0	0	55
2823	67.95	23.68	242	4	11	11	11	10	10	0	0	10
2823	67.97	23.68	242	8	66	66	66	66	66	0	0	66
2828	60.38	22.55	5	2	0	0	0	0	0	0	0	0
2829	60.60	24.80	86	2	0	0	0	0	0	0	0	0
2833	62.93	22.48	32	2	0	0	0	0	0	0	0	0
2844	66.80	24.00	84	8	55	55	55	55	55	0	0	55
2863	65.42	24.13	13	8	13	13	13	13	3	0	0	3
2864	65.78	24.58	15	8	44	44	44	44	44	0	0	44
2874	65.03	24.80	5	6	48	48	48	48	48	0	0	48
2874	65.03	24.73	7	2	0	0	0	0	0	0	0	0
2901	63.57	22.58	10	2	0	0	0	0	0	0	0	0
2901	63.73	22.58	10	8	25	25	25	25	25	0	0	25
2902	64.33	23.60	4	4	15	15	15	15	9	0	0	9
2902	64.33	23.45	4	2	0	0	0	0	0	0	0	0
2903	63.72	23.15	27	8	54	54	54	54	54	0	0	54
2903	63.72	23.20	25	4	0	0	0	0	0	0	0	0
2905	63.92	24.98	79	4	11	11	11	11	11	0	0	11
2905	63.92	24.97	79	8	45	45	45	45	45	0	0	45
2910	63.42	21.07	4	8	5	5	5	5	5	0	0	5
2910	63.43	21.07	4	8	52	52	52	52	52	0	0	52
2911	63.05	21.77	8	8	63	63	63	63	63	0	0	63
2911	63.05	21.80	4	4	0	0	0	0	0	0	0	0
2911	63.05	21.76	8	4	1	1	1	1	1	0	0	1
2912	63.10	21.58	14	2	4	4	4	4	4	0	0	4
2913	63.12	23.05	43	4	10	10	10	10	10	0	0	10
2913	63.10	23.03	41	8	63	64	64	64	64	0	0	64
2921	62.58	21.05	1	8	11	12	12	12	12	0	0	12
2921	62.88	21.10	13	8	22	22	22	22	22	0	0	22
2924	62.55	24.23	159	2	0	0	0	0	0	0	0	0
2924	62.55	24.22	157	2	9	9	9	9	9	0	0	9
2924	62.53	24.22	161	8	34	34	34	34	34	0	0	34
2924	62.53	24.02	161	2	0	0	0	0	0	0	0	0
2942	61.85	22.47	136	8	81	81	81	81	81	0	0	80
2943	61.47	23.73	92	2	0	0	0	0	0	0	0	0
2943	61.45	23.75	92	2	0	0	0	0	0	0	0	0
2944	61.42	23.58	112	8	43	43	43	43	43	0	0	43
2944	61.42	22.47	112	2	0	0	0	0	0	0	0	0
2945	61.85	24.80	143	8	73	73	73	73	73	0	0	73
2951	61.58	21.47	4	2	1	1	1	1	1	0	0	1
2952	61.47	21.80	12	8	48	48	48	48	48	0	0	47
2953	60.98	24.45	92	2	0	0	0	0	0	0	0	0
2953	60.98	24.50	92	4	0	0	0	0	0	0	0	0
2961	61.13	21.37	5	8	38	38	38	38	38	0	0	38
2963	60.82	23.48	103	8	16	16	16	16	16	0	0	16
2963	60.82	23.50	103	8	67	67	67	67	67	39	0	67
2963	60.81	23.50	103	4	1	1	1	1	1	0	0	1
2970	60.12	19.90	3	8	51	51	51	51	51	0	0	51
2970	60.12	20.00	2	4	0	0	0	0	0	0	0	0
2970	60.12	19.92	2	2	3	3	3	3	3	0	0	3
2971	60.15	19.87	10	8	21	21	21	21	21	0	0	21
2972	60.52	22.27	54	8	60	60	60	60	60	0	0	60
2972	60.52	22.30	49	4	0	0	0	0	0	0	0	0
2973	60.40	23.77	86	6	40	41	41	41	41	0	0	41
2974	60.32	24.97	58	8	78	78	78	78	78	0	0	78
2974	60.32	25.00	51	4	0	0	0	0	0	0	0	0
2974	60.31	24.96	56	4	1	1	1	1	1	0	0	1
2980	59.97	19.95	8	8	19	19	19	19	19	0	0	19
2980	59.97	19.97	10	8	17	17	17	17	11	0	0	11
2981	59.78	21.37	5	6	14	14	14	14	14	0	0	14
2981	59.78	21.38	7	8	55	55	55	55	55	0	0	55
2982	59.77	22.95	11	8	82	82	82	82	82	0	0	82
2984	59.93	24.03	15	2	0	0	0	0	0	0	0	0
2984	59.93	24.02	15	8	35	35	35	35	35	0	0	35
2986	60.10	24.92	4	8	25	25	25	25	25	0	0	25
2986	59.10	24.92	7	8	0	0	0	0	0	0	0	0
2990	60.30	20.75	5	8	26	25	25	26	26	0	0	26
2993	60.30	19.13	11	8	8	8	8	8	1	0	0	1
6019	55.93	8.65	41	1	0	0	0	0	0	0	0	0
6021	57.12	8.60	45	2	5	5	5	5	5	0	0	5
6024	57.07	8.70	7	8	8	8	8	8	8	0	0	8
6024	57.07	8.72	7	4	2	2	2	2	2	0	0	2
6030	57.10	9.85	3	8	48	48	48	48	48	18	0	48
6030	57.10	9.90	3	4	0	0	0	0	0	0	0	0
6030	57.10	9.87	3	8	38	38	38	38	38	28	0	38
6030	57.10	9.86	3	4	1	1	1	1	1	0	0	1
6032	57.38	10.33	55	1	0	0	0	0	0	0	0	0
6033	57.58	9.95	27	2	0	3	3	0	0	0	0	0
6034	57.50	10.23	28	2	0	0	0	0	0	0	0	0
6034	57.50	10.22	28	2	0	0	0	0	0	0	0	0
6037	57.78	10.73	1	2	0	0	0	0	0	0	0	0
6041	57.77	10.65	3	8	59	59	59	59	59	25	0	59
6041	57.77	10.70	3	4	0	0	0	0	0	0	0	0
6041	57.73	10.63	7	8	17	17	17	17	17	17	0	17
6041	57.73	10.65	7	2	0	0	0	0	0	0	0	0
6042	57.43	10.55	3	1	0	0	0	0	0	0	0	0
6043	57.43	10.52	84	8	1	1	1	1	1	0	0	1
6043	57.42	10.52	84	8	8	8	8	8	8	0	0	8
6043	57.40	10.52	80	8	12	12	12	12	12	0	0	12
6044	57.22	10.67	5	6	2	2	2	2	2	0	0	2
6045	57.27	10.32	16	4	0	6	6	6	6	0	0	6
6047	57.53	11.35	1	2	0	2	2	2	2	0	0	2
6047	57.53	11.40	1	2	0	0	0	0	0	0	0	0
6047	57.47	11.45	1	2	0	0	0	0	0	0	0	0
6048	56.72	10.12	2	8	18	17	17	18	18	0	0	18
6049	56.57	10.10	89	2	0	0	0	0	0	0	0	0
6052	56.70	8.22	3	8	64	64	64	64	64	37	0	64
6052	56.70	8.30	3	4	0	0	0	0	0	0	0	0
6053	56.95	9.25	6	2	0	19	19	0	0	0	0	0
6053	56.95	9.85	6	1	0	0	0	0	0	0	0	0
6053	57.00	9.30	6	1	0	0	0	0	0	0	0	0
6054	56.40	8.45	15	2	7	11	11	11	11	0	0	11
6058	56.00	8.13	3	8	15	15	15	15	15	14	0	15
6059	56.05	8.10	3	4	18	18	18	18	18	0	0	18
6060	56.30	9.12	50	8	44	44	44	44	43	18	0	43
6060	56.30	9.20	50	2	0	0	0	0	0	0	0	0
6060	56.28	9.13	52	8	33	33	33	33	33	33	0	33
6062	56.55	9.17	21	4	0	12	11	11	12	0	0	10
6065	56.70	9.52	20	4	0	10	10	10	10	0	0	10
6066	55.98	8.35	5	2	0	0	0	0	0	0	0	0
6067	56.85	10.80	0	2	0	0	0	0	0	0	0	0
6068	56.10	9.18	62	1	0	0	0	0	0	0	0	0
6069	56.53	9.62	60	8	0	0	0	0	0	0	0	0
6069	56.50	9.58	58	8	8	8	8	8	8	0	0	8
6069	56.50	9.57	58	1	0	0	0	0	0	0	0	0
6070	56.32	10.60	25	2	0	0	0	0	0	0	0	0
6070	56.30	10.62	25	8	38	38	38	38	38	38	0	38
6070	56.32	10.63	23	4	16	16	16	16	16	12	0	16
6071	56.45	10.97	8	8	60	60	60	60	60	40	0	60
6071	56.45	11.00	8	4	0	0	0	0	0	0	0	0
6073	56.10	10.52	3	2	0	3	3	0	0	0	0	0
6074	56.20	10.17	57	8	1	14	14	14	14	0	0	14
6076	56.33	10.05	19	2	0	0	0	0	0	0	0	0
6077	56.10	11.15	1	2	0	0	0	0	0	0	0	0
6079	56.70	11.55	8	4	22	22	22	22	22	0	0	22
6079	56.70	11.60	8	2	0	0	0	0	0	0	0	0
6079	56.72	11.52	3	8	3	2	2	3	3	2	0	3
6080	55.50	8.48	25	2	0	0	0	0	0	0	0	0
6080	55.52	8.55	29	4	19	19	19	19	19	0	0	19
6080	55.53	8.57	29	2	0	0	0	0	0	0	0	0
6081	55.55	8.08	12	8	19	19	19	19	18	2	0	18
6081	55.57	8.08	22	8	14	14	13	14	14	9	0	14
6084	56.18	9.03	51	2	0	0	0	0	0	0	0	0
6087	56.85	11.80	1	4	0	7	7	7	5	0	0	5
6087	56.75	11.90	0	8	0	9	9	9	0	0	0	0
6089	55.50	8.40	11	8	44	44	44	44	44	24	0	44
6096	55.18	8.57	-9999	8	12	12	12	12	12	0	0	12
6097	55.40	6.95	0	8	2	2	2	2	2	0	0	2
6099	55.08	8.57	5	2	0	19	19	0	0	0	0	0
6100	55.70	9.20	73	4	7	7	7	7	7	0	0	7
6100	55.72	9.22	74	2	3	3	3	3	3	0	0	3
6104	55.73	9.15	72	8	45	45	45	45	45	33	0	45
6104	55.73	9.17	79	8	28	28	28	28	28	18	0	28
6106	55.92	9.92	66	4	0	13	13	13	13	0	0	13
6107	55.40	7.57	1	8	18	20	20	20	19	0	0	19
6107	55.40	7.60	1	4	0	0	0	0	0	0	0	0
6107	55.57	7.33	1	8	1	1	1	1	1	0	0	1
6108	55.43	9.33	45	2	0	0	0	0	0	0	0	0
6109	55.47	9.12	62	1	0	0	0	0	0	0	0	0
6110	55.22	9.27	73	2	7	7	7	7	7	0	0	7
6110	55.23	9.27	40	8	61	61	61	61	61	51	0	61
6111	55.30	9.80	2	4	0	12	12	12	12	0	0	12
6113	55.18	9.08	44	1	0	0	0	0	0	0	0	0
6120	55.48	10.33	17	2	22	22	22	22	22	6	0	22
6120	55.47	10.33	17	4	37	37	37	37	37	22	0	37
6122	55.10	10.68	49	2	0	0	0	0	0	0	0	0
6123	55.32	9.90	6	1	0	0	0	0	0	0	0	0
6123	55.25	9.88	3	1	0	0	0	0	0	0	0	0
6124	55.02	10.57	6	2	0	0	0	0	0	0	0	0
6128	55.52	9.77	28	1	0	0	0	0	0	0	0	0
6131	55.77	10.55	-9999	2	0	18	18	0	0	0	0	0
6150	55.08	11.77	4	2	0	0	0	0	0	0	0	0
6150	55.08	11.78	4	4	18	18	18	18	18	0	0	18
6151	55.17	11.13	2	8	0	47	47	47	5	21	0	5
6151	55.17	11.20	2	2	0	0	0	0	0	0	0	0
6152	55.35	11.68	25	4	16	16	16	16	15	0	0	15
6153	55.38	11.68	38	4	0	0	0	0	0	0	0	0
6153	55.38	11.72	38	2	0	0	0	0	0	0	0	0
6154	55.20	11.85	46	1	0	0	0	0	0	0	0	0
6155	55.43	11.78	39	2	0	0	0	0	0	0	0	0
6156	55.72	11.72	12	8	0	28	28	27	27	27	0	27
6157	56.17	12.30	0	2	0	0	0	0	0	0	0	0
6158	55.33	11.12	3	2	5	5	5	5	5	0	0	5
6159	55.75	10.87	11	8	36	36	36	36	36	31	0	36
6160	55.77	12.32	17	8	26	26	26	26	26	26	0	26
6160	55.77	12.33	31	8	15	15	15	15	15	15	0	15
6161	55.98	11.87	-9999	2	0	19	19	0	0	0	0	0
6164	56.20	11.72	8	4	3	3	3	3	3	0	0	3
6168	56.12	12.35	35	8	7	7	7	7	7	0	0	7
6169	56.00	11.28	4	8	22	22	22	22	22	12	0	21
6169	56.02	11.28	12	8	4	4	4	4	4	4	0	4
6170	55.58	12.13	44	8	52	52	52	52	52	40	0	52
6174	55.40	12.15	22	2	0	0	0	0	0	0	0	0
6180	55.62	12.65	5	8	58	58	58	58	58	17	0	58
6180	55.63	12.70	5	4	0	0	0	0	0	0	0	0
6180	55.63	12.67	5	8	40	40	40	40	40	33	0	40
6180	55.63	12.66	5	4	1	1	1	1	1	0	0	1
6181	55.77	12.52	40	2	0	0	0	0	0	0	0	0
6181	55.77	12.53	42	2	0	0	0	0	0	0	0	0
6181	55.75	12.52	40	1	0	0	0	0	0	0	0	0
6182	55.72	12.68	20	1	0	0	0	0	0	0	0	0
6183	55.53	12.72	2	8	0	17	17	17	0	0	0	0
6184	55.72	12.57	8	1	0	0	0	0	0	0	0	0
6190	55.07	14.75	16	4	36	36	36	36	36	12	0	36
6191	55.32	15.18	13	8	40	40	40	40	40	35	0	40
6191	55.32	15.20	13	2	0	0	0	0	0	0	0	0
6193	55.30	14.78	11	8	42	43	43	43	43	42	0	43
6193	55.30	14.77	9	1	0	0	0	0	0	0	0	0
6196	55.02	15.07	22	4	0	2	2	2	2	0	0	2
6199	55.00	15.08	6	8	30	30	30	30	30	0	0	30
6199	55.00	15.10	6	4	0	0	0	0	0	0	0	0
10008	55.00	6.33	3	2	0	0	0	0	0	0	0	0
10020	55.02	8.42	27	24	80	80	80	80	80	50	2	80
10043	56.77	9.80	4	8	7	7	7	7	7	0	0	7
12057	63.42	10.45	127	2	0	0	0	0	0	0	0	0
20024	67.50	18.30	425	1	0	0	0	0	0	0	0	0
20029	67.92	18.60	1151	1	0	0	0	0	0	0	0	0
20072	67.73	22.83	313	1	0	0	0	0	0	0	0	0
21002	65.10	14.52	1036	1	0	0	0	0	0	0	0	0
21010	65.33	15.07	577	1	0	0	0	0	0	0	0	0
21035	65.57	17.87	393	1	0	0	0	0	0	0	0	0
21047	65.15	18.60	363	1	0	0	0	0	0	0	0	0
21049	65.60	19.27	384	1	0	0	0	0	0	0	0	0
21061	66.75	20.93	327	1	0	0	0	0	0	0	0	0
21074	66.28	21.13	186	1	0	0	0	0	0	0	0	0
22030	64.22	15.55	310	1	0	0	0	0	0	0	0	0
22033	65.53	15.38	545	1	0	0	0	0	0	0	0	0
22063	64.08	18.37	327	1	0	0	0	0	0	0	0	0
23017	62.10	13.62	566	2	0	0	0	0	0	0	0	0
24040	60.97	16.43	162	1	0	0	0	0	0	0	0	0
24064	59.37	17.90	15	2	0	0	0	0	0	0	0	0
24072	60.12	15.12	240	1	0	0	0	0	0	0	0	0
24081	59.92	16.68	58	1	0	0	0	0	0	0	0	0
24082	60.27	16.98	57	1	0	0	0	0	0	0	0	0
24090	59.83	18.63	16	1	0	0	0	0	0	0	0	0
25021	58.60	12.42	55	1	0	0	0	0	0	0	0	0
25040	58.60	12.20	174	1	0	0	0	0	0	0	0	0
25054	58.72	15.03	225	1	0	0	0	0	0	0	0	0
25058	58.68	16.32	153	2	0	0	0	0	0	0	0	0
25087	57.92	18.95	13	1	0	0	0	0	0	0	0	0
26002	56.38	12.93	140	1	0	0	0	0	0	0	0	0
26012	59.83	22.23	1	2	5	5	5	5	5	0	0	5
26012	57.92	22.05	2	8	25	25	25	25	25	0	0	25
26027	59.30	23.35	5	2	0	0	0	0	0	0	0	0
26029	59.40	24.02	26	2	0	0	0	0	0	0	0	0
26029	59.35	24.07	26	2	0	0	0	0	0	0	0	0
26029	59.35	24.05	26	8	14	14	14	14	14	0	0	14
26034	59.62	24.75	2	2	0	0	0	0	0	0	0	0
26034	59.60	24.50	2	2	0	0	0	0	0	0	0	0
26038	59.42	24.80	44	8	72	72	72	72	72	4	0	72
26038	59.25	24.48	44	1	0	0	0	0	0	0	0	0
26038	59.38	24.58	34	8	28	28	28	28	28	10	0	28
26115	58.92	22.07	9	8	77	77	77	77	77	4	0	77
26115	58.55	22.04	9	1	0	0	0	0	0	0	0	0
26115	58.92	22.10	9	4	0	0	0	0	0	0	0	0
26115	58.92	22.08	9	4	6	6	6	6	6	0	0	6
26116	58.98	22.73	8	2	0	0	0	0	0	0	0	0
26116	58.83	22.78	8	2	0	0	0	0	0	0	0	0
26116	59.00	22.82	4	8	7	7	7	7	7	0	0	7
26119	58.57	22.53	7	2	0	0	0	0	0	0	0	0
26120	58.93	23.53	5	2	0	0	0	0	0	0	0	0
26120	59.22	23.52	5	2	8	8	8	8	8	0	0	8
26122	59.13	23.53	12	2	0	0	0	0	0	0	0	0
26124	58.97	23.08	4	2	0	0	0	0	0	0	0	0
26124	58.88	23.05	4	2	4	4	4	4	4	0	0	4
26124	58.87	23.05	4	2	0	0	0	0	0	0	0	0
26124	58.95	23.82	25	4	25	25	25	25	25	0	0	25
26128	58.57	23.52	2	8	25	25	25	25	25	0	0	25
26128	58.58	23.52	2	2	0	0	0	0	0	0	0	0
26134	59.00	24.80	51	2	0	0	0	0	0	0	0	0
26134	58.97	24.73	52	4	23	23	23	23	23	0	0	23
26214	58.25	21.90	6	2	0	0	0	0	0	0	0	0
26214	58.37	21.83	6	2	0	0	0	0	0	0	0	0
26214	58.38	21.82	8	8	28	28	28	28	28	9	0	28
26215	58.25	22.48	2	8	11	11	11	11	11	0	0	11
26215	58.15	22.29	7	1	0	0	0	0	0	0	0	0
26215	58.25	22.50	2	2	0	0	0	0	0	0	0	0
26215	58.23	22.05	4	8	1	1	1	1	1	0	0	1
26215	58.23	22.50	4	8	8	8	8	8	8	0	0	8
26226	58.22	24.13	3	2	0	0	0	0	0	0	0	0
26226	58.10	23.97	3	4	25	25	25	25	25	0	0	25
26226	58.12	23.97	3	2	0	0	0	0	0	0	0	0
26227	57.80	23.25	2	2	0	0	0	0	0	0	0	0
26227	57.78	23.25	2	2	0	0	0	0	0	0	0	0
26229	57.87	24.37	11	8	19	19	19	19	19	10	0	19
26229	57.52	24.22	11	1	0	0	0	0	0	0	0	0
26229	57.87	24.40	11	2	0	0	0	0	0	0	0	0
26231	58.38	24.50	14	8	75	75	75	75	75	4	0	75
26231	58.23	24.30	14	1	0	0	0	0	0	0	0	0
26231	58.37	24.50	8	8	25	25	25	25	25	9	0	25
26310	57.23	22.75	70	2	0	0	0	0	0	0	0	0
26310	57.17	22.50	70	2	0	0	0	0	0	0	0	0
26313	57.75	22.60	5	8	92	92	92	92	92	25	0	92
26313	57.45	22.36	5	1	0	0	0	0	0	0	0	0
26314	57.22	21.33	4	1	0	0	0	0	0	0	0	0
26314	57.37	21.55	4	8	5	5	5	5	5	1	0	5
26314	57.40	21.53	3	8	14	14	14	14	14	3	0	14
26318	57.20	22.38	82	2	5	5	5	5	5	1	0	5
26318	57.12	22.23	82	1	0	0	0	0	0	0	0	0
26318	57.20	22.40	82	2	0	0	0	0	0	0	0	0
26318	57.18	22.55	80	8	13	13	13	13	13	3	0	13
26324	57.35	23.12	8	8	26	26	26	26	26	7	0	26
26324	57.21	23.07	8	1	0	0	0	0	0	0	0	0
26324	57.35	23.20	8	2	0	0	0	0	0	0	0	0
26326	57.32	24.42	10	8	18	18	18	18	18	5	0	18
26326	57.19	24.25	10	1	0	0	0	0	0	0	0	0
26326	57.32	24.50	10	2	0	0	0	0	0	0	0	0
26403	56.90	21.20	8	4	5	5	5	5	5	0	0	5
26403	56.90	21.18	8	2	0	0	0	0	0	0	0	0
26403	56.88	21.18	9	8	18	18	18	18	18	7	0	18
26406	56.55	21.02	4	8	61	61	61	61	61	12	0	61
26406	56.33	21.01	8	1	0	0	0	0	0	0	0	0
26406	56.55	21.10	6	2	0	0	0	0	0	0	0	0
26406	56.48	21.02	7	8	29	29	29	29	29	12	0	29
26414	56.73	21.83	95	2	6	6	6	5	5	0	0	5
26414	56.73	21.73	95	2	0	0	0	0	0	0	0	0
26416	56.68	22.97	112	2	0	0	0	0	0	0	0	0
26416	56.67	22.50	112	2	0	0	0	0	0	0	0	0
26416	56.68	22.50	112	8	33	33	33	33	33	14	0	33
26419	56.47	22.90	104	2	0	0	0	0	0	0	0	0
26422	56.97	24.07	3	8	71	71	71	71	71	13	0	71
26422	56.58	24.04	3	1	0	0	0	0	0	0	0	0
26422	56.97	24.10	3	4	0	0	0	0	0	0	0	0
26422	56.97	24.05	28	8	24	24	24	24	24	8	0	24
26422	56.93	24.98	9	8	5	5	5	5	5	0	0	5
26424	56.62	23.32	44	8	18	18	18	18	18	6	0	18
26425	56.65	23.73	6	8	14	14	14	14	14	5	0	14
26425	56.39	23.44	6	1	0	0	0	0	0	0	0	0
26425	56.65	23.80	6	2	0	0	0	0	0	0	0	0
26425	56.67	23.73	6	8	4	4	4	4	4	4	0	4
26429	56.40	24.18	31	2	0	0	0	0	0	0	0	0
26429	56.42	24.20	31	2	0	0	0	0	0	0	0	0
26429	56.40	24.22	33	8	14	14	14	14	14	5	0	14
26429	56.42	24.18	31	8	4	4	4	4	4	4	0	4
26502	56.03	21.08	5	1	0	0	0	0	0	0	0	0
26502	55.97	21.10	15	8	3	3	3	3	3	2	0	3
26503	56.02	21.25	18	2	0	0	0	0	0	0	0	0
26503	56.15	21.17	18	2	0	0	0	0	0	0	0	0
26509	55.70	21.15	10	8	42	43	43	42	42	10	0	42
26509	55.42	21.09	10	1	0	0	0	0	0	0	0	0
26509	55.70	21.20	10	4	0	0	0	0	0	0	0	0
26509	55.73	21.07	7	8	29	29	29	29	29	15	0	29
26515	55.97	22.27	153	2	0	0	0	0	0	0	0	0
26515	55.98	22.23	153	2	5	5	5	5	5	0	0	5
26515	55.97	22.25	153	8	11	11	11	11	11	3	0	11
26517	55.70	21.48	64	2	0	0	0	0	0	0	0	0
26518	55.62	22.23	167	8	32	32	32	32	32	18	0	32
26518	55.62	22.22	167	2	0	0	0	0	0	0	0	0
26524	55.93	23.32	108	8	92	92	92	92	92	38	0	92
26524	55.56	23.19	108	1	0	0	0	0	0	0	0	0
26524	55.93	23.40	108	4	0	0	0	0	0	0	0	0
26529	55.72	24.42	57	2	0	0	0	0	0	0	0	0
26529	55.73	24.33	57	2	0	0	0	0	0	0	0	0
26529	55.75	24.38	59	8	16	16	16	16	16	8	0	16
26531	56.22	24.75	61	2	11	11	11	11	11	2	0	11
26531	56.13	24.45	58	1	0	0	0	0	0	0	0	0
26531	56.22	24.80	61	2	0	0	0	0	0	0	0	0
26531	56.20	24.77	62	8	29	29	29	29	29	21	0	29
26600	55.35	21.47	6	8	16	16	16	16	16	8	0	16
26603	55.35	21.48	17	2	0	0	0	0	0	0	0	0
26603	55.32	21.02	17	8	13	13	13	13	13	8	0	13
26614	55.12	21.92	37	2	0	0	0	0	0	0	0	0
26614	55.08	21.87	37	2	0	0	0	0	0	0	0	0
26615	55.25	22.28	35	2	0	0	0	0	0	0	0	0
26620	55.28	23.97	70	2	0	0	0	0	0	0	0	0
26620	55.37	23.90	70	2	0	0	0	0	0	0	0	0
26620	55.40	23.87	69	8	11	11	11	11	11	10	0	11
26621	55.50	23.08	103	2	0	0	0	0	0	0	0	0
26621	55.38	23.13	103	2	0	0	0	0	0	0	0	0
26621	55.38	23.12	111	8	16	16	16	16	16	9	0	16
26634	55.23	24.77	72	2	0	0	0	0	0	0	0	0
26634	55.25	24.77	72	8	11	11	11	11	11	8	0	11
60055	56.37	8.12	5	1	0	0	0	0	0	0	0	0
60066	56.00	8.35	6	2	0	0	0	0	0	0	0	0
61056	55.73	11.60	13	1	0	0	0	0	0	0	0	0
61086	55.68	12.55	7	2	0	0	0	0	0	0	0	0
